# Supplementary material
Source: publisher figshare collection journal article supplement (https://plos.figshare.com/articles/dataset/_/5025842)
Supplement: Supplementary file 1 [file 1]

Archive with 6 entries (6 files):
- S1 Fig.pdf
- S1 File.pdf
- S2 File.pdf
- S3 File.pdf
- S4 File.pdf
- S5 File.pdf
