# Supplementary material
Source: publisher figshare collection journal article supplement (https://plos.figshare.com/articles/dataset/_/5025842)
Supplement: Supplementary file 1 [file 1 › S2 File.pdf]

## **S2 File Knowledge and attitudes scales**

### **Knowledge scale**

#### **Key**

\* For each item in Q 1a-1g, 2a-2e, and 3a-3c, participants were given a choice of yes, no, or unsure.

# For Q 4, participants were given one choice from: any of the above, all of the above, or none of the above.

\*\* For Q 5 and Q 9, participants were given one choice from: true, false or unsure. For Q 6 – Q 8 participants chose only one response.

1. Under recently enacted Pennsylvania law, you would be required to report suspected abuse when a parent, caregiver, or other adult does or causes which of the following to a child?\*

- a) Physically restrain a child by locking them in a closet
- b) Place duct tape over a child's mouth as a form of punishment
- c) Cause any kind of physical injury
- d) Cause substantial pain from disciplining a child
- e) Impair physical functioning from disciplining a child
- f) Forcefully slap a child under one year of age
- g) Expose a child to domestic violence

2. In which of the following scenarios does bruising raise sufficient concern for child abuse that Pennsylvania law requires you to report it?\*

- a) Any bruising in an infant who hasn't started pulling to stand
- b) Any bruising in a child younger than 5 years old
- c) Any bruising from spanking
- d) Bruising on a toddler's shins
- e) Bruising on a toddler's ears

3. Under Pennsylvania law, if you fail to report suspected abuse/neglect, which of the following penalties might you face?\*

- a) Financial penalty
- b) Loss of professional license
- c) Incarceration (i.e., prison)

4. Under recently enacted Pennsylvania law, for an act (or failure to act) to count as abuse/neglect, which of the following must be true? #

- The act (or failure to act) must be committed intentionally
- The act (or failure to act) must be committed knowingly
- The act (or failure to act) must be committed recklessly

5. Under Pennsylvania law, you can be held legally liable if you suspect child abuse/neglect and report it, but it turns out to be unfounded.\*\*

6. Under Pennsylvania law, once you have “reasonable cause to suspect” child abuse/neglect, you must report your suspicion to authorities:

- Within a day
- Within 48 hours
- Within 72 hours
- Immediately
- Within a week
- I am unsure

7. Under Pennsylvania law, you must report:

- Whenever I think it is possible that a child has been abused/neglected
- Only when I am certain that a child has been abused/neglected
- Whenever I have reasonable cause to suspect that a child has been abused/neglected
- Only if I think it is more likely than not that a child has been abused/neglected
- I am unsure

8. According to newly enacted Pennsylvania law, you are required to report suspected child abuse/neglect to:

- The police
- ChildLine only
- My supervisor only
- Both ChildLine and my supervisor
- I am unsure

9. Under Pennsylvania law, are you required to report suspected child abuse/neglect if a child was put at significant risk for being injured even when no injury or harm actually occurred? \*\*

### **Attitude scale**

- a) I might not report child abuse/neglect for fear of backlash from the family or others
- b) I might not report child abuse/neglect because it could result in parents doing something bad to their child
- c) I would like to fulfill my professional responsibility by reporting cases where I suspect child abuse/neglect
- d) Reporting cases of suspected child abuse/neglect improves children’s safety
- e) I would not report child abuse/neglect if I thought the child would be removed from his/her family
- f) Reporting suspected child abuse/neglect can result in children and families receiving helpful services
- g) Early childhood practitioners should be required by law to report suspected child abuse/neglect
- h) Children’s long-term interests are promoted by early childhood practitioners reporting suspected child abuse/neglect
- i) I am concerned that I could be held legally liable for reporting child abuse/neglect that turns out to be unfounded
- j) It is a waste of time to report child abuse/neglect because often no one follows up on the report
- k) I should still report suspected child abuse/neglect even if my work supervisor disagrees with me
- l) I have little confidence that Children and Youth Services will respond effectively if I report suspected child abuse/neglect
- m) I would not report suspected child abuse/neglect because it is too hard to be sure that abuse occurred
