# Supplementary material
Source: publisher figshare collection journal article supplement (https://plos.figshare.com/articles/dataset/_/5025842)
Supplement: Supplementary file 1 [file 1 › S3 File.pdf]

*Data dictionary***S3 File Data repository - Demographics**

|                            |                              |                             |     |
|----------------------------|------------------------------|-----------------------------|-----|
| <b>Data Set Name</b>       | WORK.USER                    | <b>Observations</b>         | 765 |
| <b>Member Type</b>         | DATA                         | <b>Variables</b>            | 37  |
| <b>Engine</b>              | V9                           | <b>Indexes</b>              | 0   |
| <b>Created</b>             | 08/15/2014 10:53:47          | <b>Observation Length</b>   | 296 |
| <b>Last Modified</b>       | 08/15/2014 10:53:47          | <b>Deleted Observations</b> | 0   |
| <b>Protection</b>          |                              | <b>Compressed</b>           | NO  |
| <b>Data Set Type</b>       |                              | <b>Sorted</b>               | NO  |
| <b>Label</b>               |                              |                             |     |
| <b>Data Representation</b> | WINDOWS_64                   |                             |     |
| <b>Encoding</b>            | wlatin1 Western<br>(Windows) |                             |     |

| Alphabetic List of Variables and Attributes |                                |      |     |                   |          |
|---------------------------------------------|--------------------------------|------|-----|-------------------|----------|
| #                                           | Variable                       | Type | Len | Format            | Informat |
| 11                                          | age_category_id                | Num  | 8   | AGEID.            | BEST32.  |
| 5                                           | confident_to_recognize_abuse   | Num  | 8   | YN.               | BEST32.  |
| 2                                           | contact_by_email               | Num  | 8   | YN.               | BEST32.  |
| 8                                           | county_id                      | Num  | 8   | COUNTYID.         | BEST32.  |
| 1                                           | dim_user_id                    | Num  | 8   | BEST12.           | BEST32.  |
| 14                                          | education_level_id             | Num  | 8   | EDUCATIONLEVELID. | BEST32.  |
| 19                                          | employment_type_id             | Num  | 8   | EMPLOYMENTID.     | BEST32.  |
| 10                                          | gender_id                      | Num  | 8   | GENDERID.         | BEST32.  |
| 28                                          | has_concern_for_abuse_ear      | Num  | 8   | YN.               | BEST32.  |
| 24                                          | has_concern_for_abuse_infant   | Num  | 8   | YN.               | BEST32.  |
| 29                                          | has_concern_for_abuse_none     | Num  | 8   | YN.               | BEST32.  |
| 27                                          | has_concern_for_abuse_shin     | Num  | 8   | YN.               | BEST32.  |
| 26                                          | has_concern_for_abuse_spanking | Num  | 8   | YN.               | BEST32.  |
| 25                                          | has_concern_for_abuse_younger5 | Num  | 8   | YN.               | BEST32.  |
| 31                                          | has_ethnicity_african_american | Num  | 8   | YN.               | BEST32.  |
| 34                                          | has_ethnicity_asian            | Num  | 8   | YN.               | BEST32.  |
| 32                                          | has_ethnicity_hispanic         | Num  | 8   | YN.               | BEST32.  |
| 33                                          | has_ethnicity_native_american  | Num  | 8   | YN.               | BEST32.  |
| 35                                          | has_ethnicity_native_hawaiian  | Num  | 8   | YN.               | BEST32.  |
| 36                                          | has_ethnicity_other            | Num  | 8   | YN.               | BEST32.  |
| 30                                          | has_ethnicity_white            | Num  | 8   | YN.               | BEST32.  |
| 22                                          | have_reported_abuse_id         | Num  | 8   | ABUSEID.          | BEST32.  |

*Data dictionary*

| Alphabetic List of Variables and Attributes |                                |      |     |                         |          |
|---------------------------------------------|--------------------------------|------|-----|-------------------------|----------|
| #                                           | Variable                       | Type | Len | Format                  | Informat |
| 23                                          | have_suspected_abuse_id        | Num  | 8   | ABUSEID.                | BEST32.  |
| 6                                           | is_supervisor                  | Num  | 8   | YN.                     | BEST32.  |
| 16                                          | job_responsibility_id          | Num  | 8   | JOBRESPONSIBILITYID.    | BEST32.  |
| 13                                          | marital_status_id              | Num  | 8   | MARITALSTATUSID.        | BEST32.  |
| 18                                          | number_of_children_category_id | Num  | 8   | NUMBEROFCHILDRENID.     | BEST32.  |
| 3                                           | parent                         | Num  | 8   | YN.                     | BEST32.  |
| 15                                          | preparedness_to_report_id      | Num  | 8   | PERPAREDNESSTOREPORTID. | BEST32.  |
| 4                                           | previously_trained             | Num  | 8   | YN.                     | BEST32.  |
| 12                                          | religion_id                    | Num  | 8   | RELIGIONID.             | BEST32.  |
| 37                                          | religiousness_type_id          | Num  | 8   | RELIGIOUSNESSID.        | BEST32.  |
| 7                                           | research_category_id           | Num  | 8   | RESEARCHCATEGORYID.     | BEST32.  |
| 9                                           | work_environment_type_id       | Num  | 8   | WORKENVIRONMENTID.      | BEST32.  |
| 17                                          | work_setting_id                | Num  | 8   | WORKSETTINGID.          | BEST32.  |
| 20                                          | years_as_practitioner_id       | Num  | 8   | YEARSEXPERIENCEID.      | BEST32.  |
| 21                                          | years_at_workplace_id          | Num  | 8   | YEARSEXPERIENCEID.      | BEST32.  |

| Alphabetic List of Variables and Attributes |                                                                                                                                                                                                           |
|---------------------------------------------|-----------------------------------------------------------------------------------------------------------------------------------------------------------------------------------------------------------|
| #                                           | Label                                                                                                                                                                                                     |
| 11                                          | How many years old are you?                                                                                                                                                                               |
| 5                                           | Do you feel confident in your ability to identify signs of child abuse/neglect?                                                                                                                           |
| 2                                           | Would you be willing to have the research team (from the survey center) contact you by email in a few months to learn more about your views on mandated reporting by asking you some follow-up questions? |
| 8                                           | Select the county in which you work:                                                                                                                                                                      |
| 1                                           | User ID                                                                                                                                                                                                   |
| 14                                          | What is your highest level of education?                                                                                                                                                                  |
| 19                                          | On what basis are you currently employed?                                                                                                                                                                 |
| 10                                          | What is your gender?                                                                                                                                                                                      |
| 28                                          | Has concern for abuse for toddler ear                                                                                                                                                                     |
| 24                                          | Has concern for abuse infant                                                                                                                                                                              |
| 29                                          | Has concern for abuse for none                                                                                                                                                                            |
| 27                                          | Has concern for abuse for toddler shin                                                                                                                                                                    |
| 26                                          | Has concern for abuse for spanking                                                                                                                                                                        |
| 25                                          | Has concern for abuse age younger than 5                                                                                                                                                                  |
| 31                                          | Non-Hispanic Black ethnicity                                                                                                                                                                              |
| 34                                          | Asian ethnicity                                                                                                                                                                                           |

*Data dictionary*

| Alphabetic List of Variables and Attributes |                                                                                                                             |
|---------------------------------------------|-----------------------------------------------------------------------------------------------------------------------------|
| #                                           | Label                                                                                                                       |
| 32                                          | Hispanic ethnicity                                                                                                          |
| 33                                          | Native American ethnicity                                                                                                   |
| 35                                          | Native Hawaiian ethnicity                                                                                                   |
| 36                                          | Other ethnicity                                                                                                             |
| 30                                          | Non-Hispanic White ethnicity                                                                                                |
| 22                                          | In your work as an early childhood practitioner, have you ever reported a case of child abuse/neglect?                      |
| 23                                          | In your work as an early childhood practitioner, have you ever suspected a case of child abuse/neglect and not reported it? |
| 6                                           | In your current role, are you considered to be a supervisor?                                                                |
| 16                                          | Which of the following best describes your primary job responsibilities?                                                    |
| 13                                          | What is your marital status?                                                                                                |
| 18                                          | How many children are cared for in your childhood work setting?                                                             |
| 3                                           | Are you a parent/guardian?                                                                                                  |
| 15                                          | How prepared do you feel to report child abuse/neglect should the need arise?                                               |
| 4                                           | Have you ever had any training about child abuse/neglect?                                                                   |
| 12                                          | What is your religion?                                                                                                      |
| 37                                          | How spiritual/religious would you say you are?                                                                              |
| 7                                           | Study group                                                                                                                 |
| 9                                           | Select the environment in which you work:                                                                                   |
| 17                                          | Which of the following best describes your childhood work setting?                                                          |
| 20                                          | Including this year, how many years have you worked as an early childhood practitioner?                                     |
| 21                                          | Including this year, how many years have you worked at your current workplace?                                              |

### Summary

| Would you be willing to have the research team (from the survey center) contact you by email in a few months to learn more about your views on mandated reporting by asking you some follow-up questions? |           |         |                      |                    |
|-----------------------------------------------------------------------------------------------------------------------------------------------------------------------------------------------------------|-----------|---------|----------------------|--------------------|
| contact_by_email                                                                                                                                                                                          | Frequency | Percent | Cumulative Frequency | Cumulative Percent |
| no                                                                                                                                                                                                        | 304       | 39.74   | 304                  | 39.74              |
| YES                                                                                                                                                                                                       | 461       | 60.26   | 765                  | 100.00             |

| Are you a parent/guardian? |           |         |                      |                    |
|----------------------------|-----------|---------|----------------------|--------------------|
| parent                     | Frequency | Percent | Cumulative Frequency | Cumulative Percent |
| no                         | 303       | 39.61   | 303                  | 39.61              |
| YES                        | 462       | 60.39   | 765                  | 100.00             |

| Have you ever had any training about child abuse/neglect? |           |         |                      |                    |
|-----------------------------------------------------------|-----------|---------|----------------------|--------------------|
| previously_trained                                        | Frequency | Percent | Cumulative Frequency | Cumulative Percent |
| no                                                        | 166       | 21.70   | 166                  | 21.70              |
| YES                                                       | 599       | 78.30   | 765                  | 100.00             |

| Do you feel confident in your ability to identify signs of child abuse/neglect? |           |         |                      |                    |
|---------------------------------------------------------------------------------|-----------|---------|----------------------|--------------------|
| confident_to_recognize_abuse                                                    | Frequency | Percent | Cumulative Frequency | Cumulative Percent |
| no                                                                              | 103       | 13.46   | 103                  | 13.46              |
| YES                                                                             | 662       | 86.54   | 765                  | 100.00             |

| In your current role, are you considered to be a supervisor? |           |         |                      |                    |
|--------------------------------------------------------------|-----------|---------|----------------------|--------------------|
| is_supervisor                                                | Frequency | Percent | Cumulative Frequency | Cumulative Percent |
| no                                                           | 507       | 66.27   | 507                  | 66.27              |
| YES                                                          | 258       | 33.73   | 765                  | 100.00             |

| Study group          |           |         |                      |                    |
|----------------------|-----------|---------|----------------------|--------------------|
| research_category_id | Frequency | Percent | Cumulative Frequency | Cumulative Percent |
| Experimental         | 376       | 49.15   | 376                  | 49.15              |
| Control              | 389       | 50.85   | 765                  | 100.00             |

## *Summary*

*Summary*

| Select the county in which you work: |           |         |                      |                    |
|--------------------------------------|-----------|---------|----------------------|--------------------|
| county_id                            | Frequency | Percent | Cumulative Frequency | Cumulative Percent |
| ADAMS                                | 56        | 7.32    | 56                   | 7.32               |
| ALLEFHENY                            | 60        | 7.84    | 116                  | 15.16              |
| BEAVER                               | 21        | 2.75    | 137                  | 17.91              |
| BLAIR                                | 5         | 0.65    | 142                  | 18.56              |
| BRADFORD                             | 2         | 0.26    | 144                  | 18.82              |
| BUCKS                                | 18        | 2.35    | 162                  | 21.18              |
| BUTLER                               | 7         | 0.92    | 169                  | 22.09              |
| CAMBRIA                              | 1         | 0.13    | 170                  | 22.22              |
| CARBON                               | 4         | 0.52    | 174                  | 22.75              |
| CENTRE                               | 10        | 1.31    | 184                  | 24.05              |
| CHESTER                              | 25        | 3.27    | 209                  | 27.32              |
| CLINTON                              | 7         | 0.92    | 216                  | 28.24              |
| COLUMBIA                             | 3         | 0.39    | 219                  | 28.63              |
| CRAWFORD                             | 6         | 0.78    | 225                  | 29.41              |
| CUMBERLAND                           | 26        | 3.40    | 251                  | 32.81              |
| DAUPHIN                              | 31        | 4.05    | 282                  | 36.86              |
| DELAWARE                             | 56        | 7.32    | 338                  | 44.18              |
| ELK                                  | 12        | 1.57    | 350                  | 45.75              |
| ERIE                                 | 9         | 1.18    | 359                  | 46.93              |
| FAYETTE                              | 5         | 0.65    | 364                  | 47.58              |
| FRANKLIN                             | 9         | 1.18    | 373                  | 48.76              |
| HUNTINGDON                           | 1         | 0.13    | 374                  | 48.89              |
| LACKAWANNA                           | 19        | 2.48    | 393                  | 51.37              |
| LANCASTER                            | 39        | 5.10    | 432                  | 56.47              |
| LEBANON                              | 5         | 0.65    | 437                  | 57.12              |
| LEHIGH                               | 6         | 0.78    | 443                  | 57.91              |
| LUZERNE                              | 76        | 9.93    | 519                  | 67.84              |
| LYCOMING                             | 16        | 2.09    | 535                  | 69.93              |
| MONTGOMERY                           | 58        | 7.58    | 593                  | 77.52              |
| MONTOUR                              | 13        | 1.70    | 606                  | 79.22              |
| NORTHUMBERLAND                       | 1         | 0.13    | 607                  | 79.35              |
| PERRY                                | 18        | 2.35    | 625                  | 81.70              |
| PHILIDELPHIA                         | 23        | 3.01    | 648                  | 84.71              |

*Summary*

| Select the county in which you work: |           |         |                      |                    |
|--------------------------------------|-----------|---------|----------------------|--------------------|
| county_id                            | Frequency | Percent | Cumulative Frequency | Cumulative Percent |
| WASHINGTON                           | 28        | 3.66    | 676                  | 88.37              |
| WAYNE                                | 3         | 0.39    | 679                  | 88.76              |
| WESTMORELAND                         | 23        | 3.01    | 702                  | 91.76              |
| WYOMING                              | 1         | 0.13    | 703                  | 91.90              |
| YORK                                 | 62        | 8.10    | 765                  | 100.00             |

| Select the environment in which you work: |           |         |                      |                    |
|-------------------------------------------|-----------|---------|----------------------|--------------------|
| work_environment_type_id                  | Frequency | Percent | Cumulative Frequency | Cumulative Percent |
| Rural                                     | 213       | 27.84   | 213                  | 27.84              |
| Suburban                                  | 384       | 50.20   | 597                  | 78.04              |
| Urban                                     | 168       | 21.96   | 765                  | 100.00             |

| What is your gender? |           |         |                      |                    |
|----------------------|-----------|---------|----------------------|--------------------|
| gender_id            | Frequency | Percent | Cumulative Frequency | Cumulative Percent |
| Male                 | 18        | 2.35    | 18                   | 2.35               |
| Female               | 747       | 97.65   | 765                  | 100.00             |

| How many years old are you? |           |         |                      |                    |
|-----------------------------|-----------|---------|----------------------|--------------------|
| age_category_id             | Frequency | Percent | Cumulative Frequency | Cumulative Percent |
| <18                         | 3         | 0.39    | 3                    | 0.39               |
| 18-29                       | 307       | 40.13   | 310                  | 40.52              |
| 30-44                       | 224       | 29.28   | 534                  | 69.80              |
| 45+                         | 231       | 30.20   | 765                  | 100.00             |

| What is your religion? |           |         |                      |                    |
|------------------------|-----------|---------|----------------------|--------------------|
| religion_id            | Frequency | Percent | Cumulative Frequency | Cumulative Percent |
| Baptist                | 1         | 0.13    | 1                    | 0.13               |
| Jewish                 | 1         | 0.13    | 2                    | 0.26               |
| Not provided           | 763       | 99.74   | 765                  | 100.00             |

### Summary

| How spiritual/religious would you say you are? |           |         |                      |                    |
|------------------------------------------------|-----------|---------|----------------------|--------------------|
| religiousness_type_id                          | Frequency | Percent | Cumulative Frequency | Cumulative Percent |
| EXTREMELY_NOT_RELIGIOUS                        | 10        | 1.31    | 10                   | 1.31               |
| NOT_RELIGIOUS                                  | 56        | 7.32    | 66                   | 8.63               |
| SOMEWHAT_NOT_RELIGIOUS                         | 15        | 1.96    | 81                   | 10.59              |
| NUETRAL                                        | 122       | 15.95   | 203                  | 26.54              |
| SOMEWHAT_RELIGIOUS                             | 223       | 29.15   | 426                  | 55.69              |
| RELIGIOUS                                      | 292       | 38.17   | 718                  | 93.86              |
| EXTREMELY_RELIGIOUS                            | 47        | 6.14    | 765                  | 100.00             |

| What is your marital status? |           |         |                      |                    |
|------------------------------|-----------|---------|----------------------|--------------------|
| marital_status_id            | Frequency | Percent | Cumulative Frequency | Cumulative Percent |
| Single                       | 292       | 38.17   | 292                  | 38.17              |
| Married                      | 408       | 53.33   | 700                  | 91.50              |
| Separated                    | 52        | 6.80    | 752                  | 98.30              |
| Widowed                      | 13        | 1.70    | 765                  | 100.00             |

| What is your highest level of education? |           |         |                      |                    |
|------------------------------------------|-----------|---------|----------------------|--------------------|
| education_level_id                       | Frequency | Percent | Cumulative Frequency | Cumulative Percent |
| 8th grade                                | 1         | 0.13    | 1                    | 0.13               |
| High school                              | 202       | 26.41   | 203                  | 26.54              |
| CDA                                      | 101       | 13.20   | 304                  | 39.74              |
| Associates                               | 152       | 19.87   | 456                  | 59.61              |
| Bachelors                                | 239       | 31.24   | 695                  | 90.85              |
| Masters                                  | 70        | 9.15    | 765                  | 100.00             |

### Summary

| How prepared do you feel to report child abuse/neglect should the need arise? |           |         |                      |                    |
|-------------------------------------------------------------------------------|-----------|---------|----------------------|--------------------|
| preparedness_to_report_id                                                     | Frequency | Percent | Cumulative Frequency | Cumulative Percent |
| Entirely unprepared                                                           | 9         | 1.18    | 9                    | 1.18               |
| Unprepared                                                                    | 17        | 2.22    | 26                   | 3.40               |
| Somewhat unprepared                                                           | 47        | 6.14    | 73                   | 9.54               |
| Neither                                                                       | 47        | 6.14    | 120                  | 15.69              |
| Somewhat prepared                                                             | 265       | 34.64   | 385                  | 50.33              |
| Prepared                                                                      | 288       | 37.65   | 673                  | 87.97              |
| Very prepared                                                                 | 92        | 12.03   | 765                  | 100.00             |

| Which of the following best describes your primary job responsibilities? |           |         |                      |                    |
|--------------------------------------------------------------------------|-----------|---------|----------------------|--------------------|
| job_responsibility_id                                                    | Frequency | Percent | Cumulative Frequency | Cumulative Percent |
| Pre-school teacher                                                       | 548       | 71.63   | 548                  | 71.63              |
| Early intervention specialist                                            | 2         | 0.26    | 550                  | 71.90              |
| Kindergarten teacher                                                     | 6         | 0.78    | 556                  | 72.68              |
| Grades 1-4 teacher                                                       | 14        | 1.83    | 570                  | 74.51              |
| Support staff                                                            | 25        | 3.27    | 595                  | 77.78              |
| Assistant director                                                       | 21        | 2.75    | 616                  | 80.52              |
| Director                                                                 | 83        | 10.85   | 699                  | 91.37              |
| Other                                                                    | 66        | 8.63    | 765                  | 100.00             |

| Which of the following best describes your childhood work setting? |           |         |                      |                    |
|--------------------------------------------------------------------|-----------|---------|----------------------|--------------------|
| work_setting_id                                                    | Frequency | Percent | Cumulative Frequency | Cumulative Percent |
| Home                                                               | 22        | 2.88    | 22                   | 2.88               |
| Commercial                                                         | 114       | 14.90   | 136                  | 17.78              |
| Non-commercial                                                     | 427       | 55.82   | 563                  | 73.59              |
| Head start                                                         | 64        | 8.37    | 627                  | 81.96              |
| Religious                                                          | 105       | 13.73   | 732                  | 95.69              |
| Other                                                              | 33        | 4.31    | 765                  | 100.00             |

### Summary

| How many children are cared for in your childhood work setting? |           |         |                      |                    |
|-----------------------------------------------------------------|-----------|---------|----------------------|--------------------|
| number_of_children_category_id                                  | Frequency | Percent | Cumulative Frequency | Cumulative Percent |
| <10                                                             | 46        | 6.01    | 46                   | 6.01               |
| 10-25                                                           | 253       | 33.07   | 299                  | 39.08              |
| >25                                                             | 466       | 60.92   | 765                  | 100.00             |

| On what basis are you currently employed? |           |         |                      |                    |
|-------------------------------------------|-----------|---------|----------------------|--------------------|
| employment_type_id                        | Frequency | Percent | Cumulative Frequency | Cumulative Percent |
| Permanent full-time                       | 552       | 72.16   | 552                  | 72.16              |
| Permanent part-time                       | 171       | 22.35   | 723                  | 94.51              |
| Substitute teacher                        | 6         | 0.78    | 729                  | 95.29              |
| Seasonal                                  | 29        | 3.79    | 758                  | 99.08              |
| Volunteer                                 | 2         | 0.26    | 760                  | 99.35              |
| Other                                     | 5         | 0.65    | 765                  | 100.00             |

| Including this year, how many years have you worked as an early childhood practitioner? |           |         |                      |                    |
|-----------------------------------------------------------------------------------------|-----------|---------|----------------------|--------------------|
| years_as_practitioner_id                                                                | Frequency | Percent | Cumulative Frequency | Cumulative Percent |
| <1                                                                                      | 68        | 8.89    | 68                   | 8.89               |
| 1-2                                                                                     | 117       | 15.29   | 185                  | 24.18              |
| 3-5                                                                                     | 151       | 19.74   | 336                  | 43.92              |
| 6-10                                                                                    | 159       | 20.78   | 495                  | 64.71              |
| 11-15                                                                                   | 76        | 9.93    | 571                  | 74.64              |
| >15                                                                                     | 194       | 25.36   | 765                  | 100.00             |

### Summary

| Including this year, how many years have you worked at your current workplace? |           |         |                      |                    |
|--------------------------------------------------------------------------------|-----------|---------|----------------------|--------------------|
| years_at_workplace_id                                                          | Frequency | Percent | Cumulative Frequency | Cumulative Percent |
| <1                                                                             | 160       | 20.92   | 160                  | 20.92              |
| 1-2                                                                            | 165       | 21.57   | 325                  | 42.48              |
| 3-5                                                                            | 160       | 20.92   | 485                  | 63.40              |
| 6-10                                                                           | 136       | 17.78   | 621                  | 81.18              |
| 11-15                                                                          | 55        | 7.19    | 676                  | 88.37              |
| >15                                                                            | 89        | 11.63   | 765                  | 100.00             |

| In your work as an early childhood practitioner, have you ever reported a case of child abuse/neglect? |           |         |                      |                    |
|--------------------------------------------------------------------------------------------------------|-----------|---------|----------------------|--------------------|
| have_reported_abuse_id                                                                                 | Frequency | Percent | Cumulative Frequency | Cumulative Percent |
| No                                                                                                     | 527       | 68.89   | 527                  | 68.89              |
| Once                                                                                                   | 98        | 12.81   | 625                  | 81.70              |
| 2-5 times                                                                                              | 100       | 13.07   | 725                  | 94.77              |
| 6-10 times                                                                                             | 16        | 2.09    | 741                  | 96.86              |
| More than 10 times                                                                                     | 8         | 1.05    | 749                  | 97.91              |
| No answer                                                                                              | 16        | 2.09    | 765                  | 100.00             |

| In your work as an early childhood practitioner, have you ever suspected a case of child abuse/neglect and not reported it? |           |         |                      |                    |
|-----------------------------------------------------------------------------------------------------------------------------|-----------|---------|----------------------|--------------------|
| have_suspected_abuse_id                                                                                                     | Frequency | Percent | Cumulative Frequency | Cumulative Percent |
| No                                                                                                                          | 638       | 83.40   | 638                  | 83.40              |
| Once                                                                                                                        | 57        | 7.45    | 695                  | 90.85              |
| 2-5 times                                                                                                                   | 36        | 4.71    | 731                  | 95.56              |
| 6-10 times                                                                                                                  | 3         | 0.39    | 734                  | 95.95              |
| No answer                                                                                                                   | 31        | 4.05    | 765                  | 100.00             |

| Has concern for abuse infant |           |         |                      |                    |
|------------------------------|-----------|---------|----------------------|--------------------|
| has_concern_for_abuse_infant | Frequency | Percent | Cumulative Frequency | Cumulative Percent |
| no                           | 134       | 17.52   | 134                  | 17.52              |
| YES                          | 631       | 82.48   | 765                  | 100.00             |

### Summary

| Has concern for abuse age younger than 5 |           |         |                      |                    |
|------------------------------------------|-----------|---------|----------------------|--------------------|
| has_concern_for_abuse_younger5           | Frequency | Percent | Cumulative Frequency | Cumulative Percent |
| no                                       | 540       | 70.59   | 540                  | 70.59              |
| YES                                      | 225       | 29.41   | 765                  | 100.00             |

| Has concern for abuse for spanking |           |         |                      |                    |
|------------------------------------|-----------|---------|----------------------|--------------------|
| has_concern_for_abuse_spanking     | Frequency | Percent | Cumulative Frequency | Cumulative Percent |
| no                                 | 154       | 20.13   | 154                  | 20.13              |
| YES                                | 611       | 79.87   | 765                  | 100.00             |

| Has concern for abuse for toddler shin |           |         |                      |                    |
|----------------------------------------|-----------|---------|----------------------|--------------------|
| has_concern_for_abuse_shin             | Frequency | Percent | Cumulative Frequency | Cumulative Percent |
| no                                     | 619       | 80.92   | 619                  | 80.92              |
| YES                                    | 146       | 19.08   | 765                  | 100.00             |

| Has concern for abuse for toddler ear |           |         |                      |                    |
|---------------------------------------|-----------|---------|----------------------|--------------------|
| has_concern_for_abuse_ear             | Frequency | Percent | Cumulative Frequency | Cumulative Percent |
| no                                    | 267       | 34.90   | 267                  | 34.90              |
| YES                                   | 498       | 65.10   | 765                  | 100.00             |

| Has concern for abuse for none |           |         |                      |                    |
|--------------------------------|-----------|---------|----------------------|--------------------|
| has_concern_for_abuse_none     | Frequency | Percent | Cumulative Frequency | Cumulative Percent |
| no                             | 748       | 97.78   | 748                  | 97.78              |
| YES                            | 17        | 2.22    | 765                  | 100.00             |

| Non-Hispanic White ethnicity |           |         |                      |                    |
|------------------------------|-----------|---------|----------------------|--------------------|
| has_ethnicity_white          | Frequency | Percent | Cumulative Frequency | Cumulative Percent |
| no                           | 118       | 15.42   | 118                  | 15.42              |
| YES                          | 647       | 84.58   | 765                  | 100.00             |

*Summary*

| Non-Hispanic Black ethnicity   |           |         |                      |                    |
|--------------------------------|-----------|---------|----------------------|--------------------|
| has_ethnicity_african_american | Frequency | Percent | Cumulative Frequency | Cumulative Percent |
| no                             | 697       | 91.11   | 697                  | 91.11              |
| YES                            | 68        | 8.89    | 765                  | 100.00             |

| Hispanic ethnicity     |           |         |                      |                    |
|------------------------|-----------|---------|----------------------|--------------------|
| has_ethnicity_hispanic | Frequency | Percent | Cumulative Frequency | Cumulative Percent |
| no                     | 740       | 96.73   | 740                  | 96.73              |
| YES                    | 25        | 3.27    | 765                  | 100.00             |

| Native American ethnicity     |           |         |                      |                    |
|-------------------------------|-----------|---------|----------------------|--------------------|
| has_ethnicity_native_american | Frequency | Percent | Cumulative Frequency | Cumulative Percent |
| no                            | 762       | 99.61   | 762                  | 99.61              |
| YES                           | 3         | 0.39    | 765                  | 100.00             |

| Asian ethnicity     |           |         |                      |                    |
|---------------------|-----------|---------|----------------------|--------------------|
| has_ethnicity_asian | Frequency | Percent | Cumulative Frequency | Cumulative Percent |
| no                  | 748       | 97.78   | 748                  | 97.78              |
| YES                 | 17        | 2.22    | 765                  | 100.00             |

| Native Hawaiian ethnicity     |           |         |                      |                    |
|-------------------------------|-----------|---------|----------------------|--------------------|
| has_ethnicity_native_hawaiian | Frequency | Percent | Cumulative Frequency | Cumulative Percent |
| no                            | 764       | 99.87   | 764                  | 99.87              |
| YES                           | 1         | 0.13    | 765                  | 100.00             |

| Other ethnicity     |           |         |                      |                    |
|---------------------|-----------|---------|----------------------|--------------------|
| has_ethnicity_other | Frequency | Percent | Cumulative Frequency | Cumulative Percent |
| no                  | 752       | 98.30   | 752                  | 98.30              |
| YES                 | 13        | 1.70    | 765                  | 100.00             |
