# Supplementary material
Source: publisher figshare collection journal article supplement (https://plos.figshare.com/articles/dataset/_/5025842)
Supplement: Supplementary file 1 [file 1 › S4 File.pdf]

*Data dictionary***S4 File Data repository - Knowledge**

|                            |                           |                             |      |
|----------------------------|---------------------------|-----------------------------|------|
| <b>Data Set Name</b>       | WORK.KNOW                 | <b>Observations</b>         | 1857 |
| <b>Member Type</b>         | DATA                      | <b>Variables</b>            | 54   |
| <b>Engine</b>              | V9                        | <b>Indexes</b>              | 0    |
| <b>Created</b>             | 08/15/2014 10:53:47       | <b>Observation Length</b>   | 432  |
| <b>Last Modified</b>       | 08/15/2014 10:53:47       | <b>Deleted Observations</b> | 0    |
| <b>Protection</b>          |                           | <b>Compressed</b>           | NO   |
| <b>Data Set Type</b>       |                           | <b>Sorted</b>               | NO   |
| <b>Label</b>               |                           |                             |      |
| <b>Data Representation</b> | WINDOWS_64                |                             |      |
| <b>Encoding</b>            | wlatin1 Western (Windows) |                             |      |

**Alphabetic List of Variables and Attributes**

| #  | Variable         | Type | Len | Format        | Informat | Label                                                                                                                                                                                    |
|----|------------------|------|-----|---------------|----------|------------------------------------------------------------------------------------------------------------------------------------------------------------------------------------------|
| 4  | date             | Num  | 8   | MMDDYY10.     |          | Date of submission                                                                                                                                                                       |
| 1  | dim_user_id      | Num  | 8   | BEST12.       | BEST32.  | dim_user_idect ID                                                                                                                                                                        |
| 2  | event            | Num  | 8   | LESSONTYPEID. |          | Time                                                                                                                                                                                     |
| 3  | group            | Num  | 8   | GRP.          |          | Study group                                                                                                                                                                              |
| 23 | know_q4          | Num  | 8   | KNOWQ4F.      |          | Under recently enacted Pennsylvania law, for an act (or failure to act) to count as abuse/neglect, which of the following must be true?                                                  |
| 24 | know_q5          | Num  | 8   | KNOWQ5F.      |          | Under Pennsylvania law, you can be held legally liable if you suspect child abuse/neglect and report it, but it turns out to be unfounded.                                               |
| 25 | know_q6          | Num  | 8   | KNOWQ6F.      |          | Under Pennsylvania law, once you have reasonable cause to suspect child abuse/neglect, you must report your suspicion to authorities:                                                    |
| 26 | know_q7          | Num  | 8   | KNOWQ7F.      |          | Under Pennsylvania law, you must report:                                                                                                                                                 |
| 27 | know_q8          | Num  | 8   | KNOWQ8F.      |          | According to newly enacted Pennsylvania law, you are required to report suspected child abuse/neglect to:                                                                                |
| 28 | know_q9          | Num  | 8   | KNOWQ9F.      |          | To count as physical child abuse, it must result in a child experiencing:                                                                                                                |
| 21 | know_q10         | Num  | 8   | YN.           |          | Under Pennsylvania law, are you required to report suspected child abuse/neglect if a child was put at significant risk for being injured even when no injury or harm actually occurred? |
| 29 | know_q11         | Num  | 8   | KNOWQ11F.     |          | Requirements for reporting suspected child abuse/neglect refer to recent events. How long ago counts as recent under Pennsylvania law?                                                   |
| 22 | know_q12         | Num  | 8   | YN.           |          | Do you feel confident in your ability to identify signs of child abuse/neglect?                                                                                                          |
| 30 | know_q13         | Num  | 8   | KNOWQ13F.     |          | How prepared do you feel to report child abuse/neglect should the need arise?                                                                                                            |
| 52 | know_q10_correct | Num  | 8   | YN.           |          | Knowledge Question 10 correct                                                                                                                                                            |
| 53 | know_q11_correct | Num  | 8   | YN.           |          | Knowledge Question 11 correct                                                                                                                                                            |

*Data dictionary*

| Alphabetic List of Variables and Attributes |                  |      |     |        |          |                                                               |
|---------------------------------------------|------------------|------|-----|--------|----------|---------------------------------------------------------------|
| #                                           | Variable         | Type | Len | Format | Informat | Label                                                         |
| 6                                           | know_q1a         | Num  | 8   | YN.    |          | Physically restrain a child by locking them in a closet       |
| 31                                          | know_q1a_correct | Num  | 8   | YN.    |          | Knowledge Question 1a correct                                 |
| 7                                           | know_q1b         | Num  | 8   | YN.    |          | Place duct tape over a child's mouth as a form of punishment  |
| 32                                          | know_q1b_correct | Num  | 8   | YN.    |          | Knowledge Question 1b correct                                 |
| 8                                           | know_q1c         | Num  | 8   | YN.    |          | Cause any kind of physical injury                             |
| 33                                          | know_q1c_correct | Num  | 8   | YN.    |          | Knowledge Question 1c correct                                 |
| 9                                           | know_q1d         | Num  | 8   | YN.    |          | Cause substantial pain from disciplining a child              |
| 34                                          | know_q1d_correct | Num  | 8   | YN.    |          | Knowledge Question 1d correct                                 |
| 10                                          | know_q1e         | Num  | 8   | YN.    |          | Impair physical functioning from disciplining a child         |
| 35                                          | know_q1e_correct | Num  | 8   | YN.    |          | Knowledge Question 1e correct                                 |
| 11                                          | know_q1f         | Num  | 8   | YN.    |          | Forcefully slap a child under one year of age                 |
| 36                                          | know_q1f_correct | Num  | 8   | YN.    |          | Knowledge Question 1f correct                                 |
| 12                                          | know_q1g         | Num  | 8   | YN.    |          | Expose a child to domestic violence                           |
| 37                                          | know_q1g_correct | Num  | 8   | YN.    |          | Knowledge Question 1g correct                                 |
| 13                                          | know_q2a         | Num  | 8   | YN.    |          | Any bruising in an infant who hasn't started pulling to stand |
| 38                                          | know_q2a_correct | Num  | 8   | YN.    |          | Knowledge Question 2a correct                                 |
| 14                                          | know_q2b         | Num  | 8   | YN.    |          | Any bruising in a child younger than 5 years old              |
| 39                                          | know_q2b_correct | Num  | 8   | YN.    |          | Knowledge Question 2b correct                                 |
| 15                                          | know_q2c         | Num  | 8   | YN.    |          | Any bruising from spanking                                    |
| 40                                          | know_q2c_correct | Num  | 8   | YN.    |          | Knowledge Question 2c correct                                 |
| 16                                          | know_q2d         | Num  | 8   | YN.    |          | Bruising on toddler's shins                                   |
| 41                                          | know_q2d_correct | Num  | 8   | YN.    |          | Knowledge Question 2d correct                                 |
| 17                                          | know_q2e         | Num  | 8   | YN.    |          | Bruising on toddler's ears                                    |
| 42                                          | know_q2e_correct | Num  | 8   | YN.    |          | Knowledge Question 2e correct                                 |
| 18                                          | know_q3a         | Num  | 8   | YN.    |          | Financial penalty                                             |
| 43                                          | know_q3a_correct | Num  | 8   | YN.    |          | Knowledge Question 3a correct                                 |
| 19                                          | know_q3b         | Num  | 8   | YN.    |          | Loss of professional license                                  |
| 44                                          | know_q3b_correct | Num  | 8   | YN.    |          | Knowledge Question 3b correct                                 |
| 20                                          | know_q3c         | Num  | 8   | YN.    |          | Incarceration                                                 |
| 45                                          | know_q3c_correct | Num  | 8   | YN.    |          | Knowledge Question 3c correct                                 |
| 46                                          | know_q4_correct  | Num  | 8   | YN.    |          | Knowledge Question 4 correct                                  |
| 47                                          | know_q5_correct  | Num  | 8   | YN.    |          | Knowledge Question 5 correct                                  |
| 48                                          | know_q6_correct  | Num  | 8   | YN.    |          | Knowledge Question 6 correct                                  |
| 49                                          | know_q7_correct  | Num  | 8   | YN.    |          | Knowledge Question 7 correct                                  |

*Data dictionary***Alphabetic List of Variables and Attributes**

| #         | Variable        | Type | Len | Format | Informat | Label                        |
|-----------|-----------------|------|-----|--------|----------|------------------------------|
| <b>50</b> | know_q8_correct | Num  | 8   | YN.    |          | Knowledge Question 8 correct |
| <b>51</b> | know_q9_correct | Num  | 8   | YN.    |          | Knowledge Question 9 correct |
| <b>54</b> | know_score      | Num  | 8   |        |          | Total knowledge score        |
| <b>5</b>  | time            | Num  | 8   | TIME.  |          | Time of submission           |

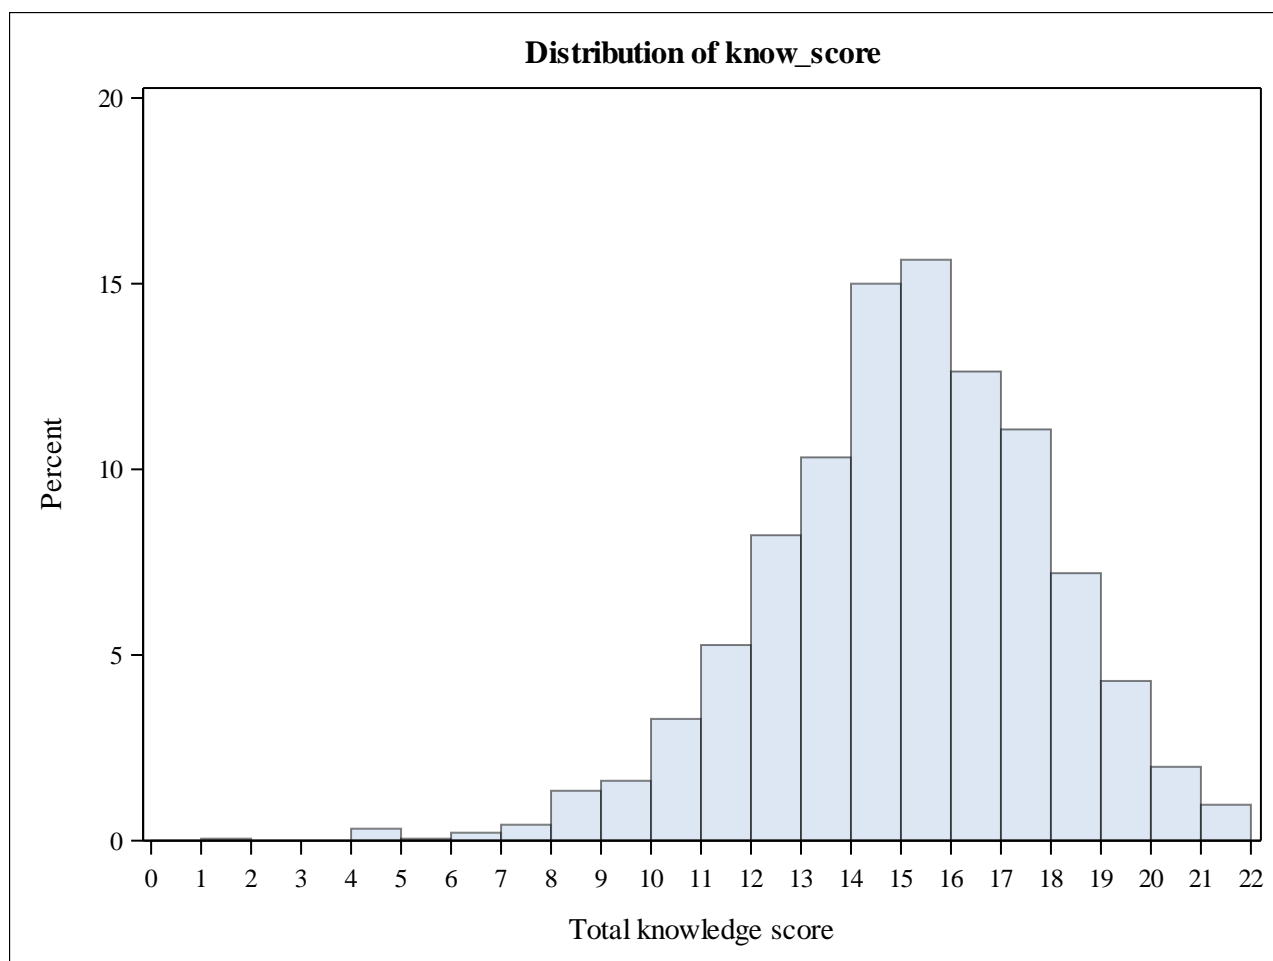

| Analysis Variable : know_score Total knowledge score |        |       |         |        |                |         |         |
|------------------------------------------------------|--------|-------|---------|--------|----------------|---------|---------|
| N                                                    | N Miss | Mean  | Std Dev | Median | Quartile Range | Minimum | Maximum |
| 1856                                                 | 1      | 14.62 | 2.80    | 15.00  | 4.00           | 1.00    | 21.00   |

| Analysis Variable : know_score Total knowledge score |             |       |     |        |       |         |        |                |         |         |
|------------------------------------------------------|-------------|-------|-----|--------|-------|---------|--------|----------------|---------|---------|
| Study group                                          | Time        | N Obs | N   | N Miss | Mean  | Std Dev | Median | Quartile Range | Minimum | Maximum |
| Control                                              | Pre-survey  | 371   | 371 | 0      | 13.53 | 2.66    | 14.00  | 3.00           | 4.00    | 21.00   |
|                                                      | Post-survey | 365   | 365 | 0      | 16.30 | 2.09    | 16.00  | 3.00           | 9.00    | 21.00   |
|                                                      | Re-test     | 371   | 371 | 0      | 13.59 | 2.64    | 14.00  | 3.00           | 1.00    | 21.00   |
| Experimental                                         | Pre-survey  | 377   | 376 | 1      | 13.52 | 2.60    | 14.00  | 3.00           | 4.00    | 21.00   |
|                                                      | Post-survey | 373   | 373 | 0      | 16.20 | 2.29    | 16.00  | 3.00           | 4.00    | 21.00   |

| Total knowledge score |           |         |                      |                    |
|-----------------------|-----------|---------|----------------------|--------------------|
| know_score            | Frequency | Percent | Cumulative Frequency | Cumulative Percent |
| 1                     | 1         | 0.05    | 1                    | 0.05               |
| 4                     | 6         | 0.32    | 7                    | 0.38               |
| 5                     | 1         | 0.05    | 8                    | 0.43               |
| 6                     | 4         | 0.22    | 12                   | 0.65               |
| 7                     | 8         | 0.43    | 20                   | 1.08               |
| 8                     | 25        | 1.35    | 45                   | 2.42               |
| 9                     | 30        | 1.62    | 75                   | 4.04               |
| 10                    | 61        | 3.29    | 136                  | 7.33               |
| 11                    | 98        | 5.28    | 234                  | 12.61              |
| 12                    | 153       | 8.24    | 387                  | 20.85              |
| 13                    | 192       | 10.34   | 579                  | 31.20              |
| 14                    | 278       | 14.98   | 857                  | 46.17              |
| 15                    | 290       | 15.63   | 1147                 | 61.80              |
| 16                    | 234       | 12.61   | 1381                 | 74.41              |
| 17                    | 206       | 11.10   | 1587                 | 85.51              |
| 18                    | 134       | 7.22    | 1721                 | 92.73              |
| 19                    | 80        | 4.31    | 1801                 | 97.04              |
| 20                    | 37        | 1.99    | 1838                 | 99.03              |
| 21                    | 18        | 0.97    | 1856                 | 100.00             |
| Frequency Missing = 1 |           |         |                      |                    |

| Physically restrain a child by locking them in a closet |           |         |                      |                    |
|---------------------------------------------------------|-----------|---------|----------------------|--------------------|
| know_q1a                                                | Frequency | Percent | Cumulative Frequency | Cumulative Percent |
| no                                                      | 33        | 1.78    | 33                   | 1.78               |
| YES                                                     | 1786      | 96.18   | 1819                 | 97.95              |
| Unsure                                                  | 38        | 2.05    | 1857                 | 100.00             |

| Table 1 of know_q1a by event                                      |                                |                                |                                |                |
|-------------------------------------------------------------------|--------------------------------|--------------------------------|--------------------------------|----------------|
| Controlling for group=Control                                     |                                |                                |                                |                |
| know_q1a(Physically restrain a child by locking them in a closet) | event(Time)                    |                                |                                |                |
| Frequency<br>Percent<br>Row Pct<br>Col Pct                        | Pre-survey                     | Post-survey                    | Re-test                        | Total          |
| no                                                                | 11<br>0.99<br>57.89<br>2.96    | 1<br>0.09<br>5.26<br>0.27      | 7<br>0.63<br>36.84<br>1.89     | 19<br>1.72     |
| YES                                                               | 349<br>31.53<br>32.83<br>94.07 | 363<br>32.79<br>34.15<br>99.45 | 351<br>31.71<br>33.02<br>94.61 | 1063<br>96.03  |
| Unsure                                                            | 11<br>0.99<br>44.00<br>2.96    | 1<br>0.09<br>4.00<br>0.27      | 13<br>1.17<br>52.00<br>3.50    | 25<br>2.26     |
| Total                                                             | 371<br>33.51                   | 365<br>32.97                   | 371<br>33.51                   | 1107<br>100.00 |

| Table 2 of know_q1a by event                                               |                                |                                |                        |               |
|----------------------------------------------------------------------------|--------------------------------|--------------------------------|------------------------|---------------|
| Controlling for group=Experimental                                         |                                |                                |                        |               |
| know_q1a(Physically<br>restrain a child by<br>locking them in a<br>closet) | event(Time)                    |                                |                        |               |
| Frequency<br>Percent<br>Row Pct<br>Col Pct                                 | Pre-survey                     | Post-survey                    | Re-test                | Total         |
| <b>no</b>                                                                  | 8<br>1.07<br>57.14<br>2.12     | 6<br>0.80<br>42.86<br>1.61     | 0<br>0.00<br>0.00<br>. | 14<br>1.87    |
| <b>YES</b>                                                                 | 357<br>47.60<br>49.38<br>94.69 | 366<br>48.80<br>50.62<br>98.12 | 0<br>0.00<br>0.00<br>. | 723<br>96.40  |
| <b>Unsure</b>                                                              | 12<br>1.60<br>92.31<br>3.18    | 1<br>0.13<br>7.69<br>0.27      | 0<br>0.00<br>0.00<br>. | 13<br>1.73    |
| <b>Total</b>                                                               | 377<br>50.27                   | 373<br>49.73                   | 0<br>0.00              | 750<br>100.00 |

| Knowledge Question 1a correct |           |         |                      |                    |
|-------------------------------|-----------|---------|----------------------|--------------------|
| know_q1a_correct              | Frequency | Percent | Cumulative Frequency | Cumulative Percent |
| no                            | 71        | 3.82    | 71                   | 3.82               |
| YES                           | 1786      | 96.18   | 1857                 | 100.00             |

| Table 1 of know_q1a_correct by event            |                                |                                |                                |                |
|-------------------------------------------------|--------------------------------|--------------------------------|--------------------------------|----------------|
| Controlling for group=Control                   |                                |                                |                                |                |
| know_q1a_correct(Knowledge Question 1a correct) | event(Time)                    |                                |                                |                |
| Frequency<br>Percent<br>Row Pct<br>Col Pct      | Pre-survey                     | Post-survey                    | Re-test                        | Total          |
| no                                              | 22<br>1.99<br>50.00<br>5.93    | 2<br>0.18<br>4.55<br>0.55      | 20<br>1.81<br>45.45<br>5.39    | 44<br>3.97     |
| YES                                             | 349<br>31.53<br>32.83<br>94.07 | 363<br>32.79<br>34.15<br>99.45 | 351<br>31.71<br>33.02<br>94.61 | 1063<br>96.03  |
| Total                                           | 371<br>33.51                   | 365<br>32.97                   | 371<br>33.51                   | 1107<br>100.00 |

| Table 2 of know_q1a_correct by event            |                                |                                |                        |               |
|-------------------------------------------------|--------------------------------|--------------------------------|------------------------|---------------|
| Controlling for group=Experimental              |                                |                                |                        |               |
| know_q1a_correct(Knowledge Question 1a correct) | event(Time)                    |                                |                        |               |
| Frequency<br>Percent<br>Row Pct<br>Col Pct      | Pre-survey                     | Post-survey                    | Re-test                | Total         |
| no                                              | 20<br>2.67<br>74.07<br>5.31    | 7<br>0.93<br>25.93<br>1.88     | 0<br>0.00<br>0.00<br>. | 27<br>3.60    |
| YES                                             | 357<br>47.60<br>49.38<br>94.69 | 366<br>48.80<br>50.62<br>98.12 | 0<br>0.00<br>0.00<br>. | 723<br>96.40  |
| Total                                           | 377<br>50.27                   | 373<br>49.73                   | 0<br>0.00              | 750<br>100.00 |

| Place duct tape over a child's mouth as a form of punishment |           |         |                      |                    |
|--------------------------------------------------------------|-----------|---------|----------------------|--------------------|
| know_q1b                                                     | Frequency | Percent | Cumulative Frequency | Cumulative Percent |
| no                                                           | 38        | 2.05    | 38                   | 2.05               |
| YES                                                          | 1771      | 95.37   | 1809                 | 97.42              |
| Unsure                                                       | 48        | 2.58    | 1857                 | 100.00             |

| Table 1 of know_q1b by event                                           |                                |                                |                                |                |
|------------------------------------------------------------------------|--------------------------------|--------------------------------|--------------------------------|----------------|
| Controlling for group=Control                                          |                                |                                |                                |                |
| know_q1b(Place duct tape over a child's mouth as a form of punishment) | event(Time)                    |                                |                                |                |
| Frequency<br>Percent<br>Row Pct<br>Col Pct                             | Pre-survey                     | Post-survey                    | Re-test                        | Total          |
| no                                                                     | 11<br>0.99<br>55.00<br>2.96    | 4<br>0.36<br>20.00<br>1.10     | 5<br>0.45<br>25.00<br>1.35     | 20<br>1.81     |
| YES                                                                    | 346<br>31.26<br>32.83<br>93.26 | 358<br>32.34<br>33.97<br>98.08 | 350<br>31.62<br>33.21<br>94.34 | 1054<br>95.21  |
| Unsure                                                                 | 14<br>1.26<br>42.42<br>3.77    | 3<br>0.27<br>9.09<br>0.82      | 16<br>1.45<br>48.48<br>4.31    | 33<br>2.98     |
| Total                                                                  | 371<br>33.51                   | 365<br>32.97                   | 371<br>33.51                   | 1107<br>100.00 |

| Table 2 of know_q1b by event                                                       |                                |                                |                        |               |
|------------------------------------------------------------------------------------|--------------------------------|--------------------------------|------------------------|---------------|
| Controlling for group=Experimental                                                 |                                |                                |                        |               |
| know_q1b(Place<br>duct tape over a<br>child's mouth as<br>a form of<br>punishment) | event(Time)                    |                                |                        |               |
| Frequency<br>Percent<br>Row Pct<br>Col Pct                                         | Pre-survey                     | Post-survey                    | Re-test                | Total         |
| <b>no</b>                                                                          | 9<br>1.20<br>50.00<br>2.39     | 9<br>1.20<br>50.00<br>2.41     | 0<br>0.00<br>0.00<br>. | 18<br>2.40    |
| <b>YES</b>                                                                         | 355<br>47.33<br>49.51<br>94.16 | 362<br>48.27<br>50.49<br>97.05 | 0<br>0.00<br>0.00<br>. | 717<br>95.60  |
| <b>Unsure</b>                                                                      | 13<br>1.73<br>86.67<br>3.45    | 2<br>0.27<br>13.33<br>0.54     | 0<br>0.00<br>0.00<br>. | 15<br>2.00    |
| <b>Total</b>                                                                       | 377<br>50.27                   | 373<br>49.73                   | 0<br>0.00              | 750<br>100.00 |

| Knowledge Question 1b correct |           |         |                      |                    |
|-------------------------------|-----------|---------|----------------------|--------------------|
| know_q1b_correct              | Frequency | Percent | Cumulative Frequency | Cumulative Percent |
| no                            | 86        | 4.63    | 86                   | 4.63               |
| YES                           | 1771      | 95.37   | 1857                 | 100.00             |

| Table 1 of know_q1b_correct by event            |                                |                                |                                |                |
|-------------------------------------------------|--------------------------------|--------------------------------|--------------------------------|----------------|
| Controlling for group=Control                   |                                |                                |                                |                |
| know_q1b_correct(Knowledge Question 1b correct) | event(Time)                    |                                |                                |                |
| Frequency<br>Percent<br>Row Pct<br>Col Pct      | Pre-survey                     | Post-survey                    | Re-test                        | Total          |
| no                                              | 25<br>2.26<br>47.17<br>6.74    | 7<br>0.63<br>13.21<br>1.92     | 21<br>1.90<br>39.62<br>5.66    | 53<br>4.79     |
| YES                                             | 346<br>31.26<br>32.83<br>93.26 | 358<br>32.34<br>33.97<br>98.08 | 350<br>31.62<br>33.21<br>94.34 | 1054<br>95.21  |
| Total                                           | 371<br>33.51                   | 365<br>32.97                   | 371<br>33.51                   | 1107<br>100.00 |

| Table 2 of know_q1b_correct by event            |                                |                                |                        |               |
|-------------------------------------------------|--------------------------------|--------------------------------|------------------------|---------------|
| Controlling for group=Experimental              |                                |                                |                        |               |
| know_q1b_correct(Knowledge Question 1b correct) | event(Time)                    |                                |                        |               |
| Frequency<br>Percent<br>Row Pct<br>Col Pct      | Pre-survey                     | Post-survey                    | Re-test                | Total         |
| no                                              | 22<br>2.93<br>66.67<br>5.84    | 11<br>1.47<br>33.33<br>2.95    | 0<br>0.00<br>0.00<br>. | 33<br>4.40    |
| YES                                             | 355<br>47.33<br>49.51<br>94.16 | 362<br>48.27<br>50.49<br>97.05 | 0<br>0.00<br>0.00<br>. | 717<br>95.60  |
| Total                                           | 377<br>50.27                   | 373<br>49.73                   | 0<br>0.00              | 750<br>100.00 |

| Cause any kind of physical injury |           |         |                      |                    |
|-----------------------------------|-----------|---------|----------------------|--------------------|
| know_q1c                          | Frequency | Percent | Cumulative Frequency | Cumulative Percent |
| no                                | 146       | 7.86    | 146                  | 7.86               |
| YES                               | 1598      | 86.05   | 1744                 | 93.91              |
| Unsure                            | 113       | 6.09    | 1857                 | 100.00             |

| Table 1 of know_q1c by event                |                                |                                |                                |                |
|---------------------------------------------|--------------------------------|--------------------------------|--------------------------------|----------------|
| Controlling for group=Control               |                                |                                |                                |                |
| know_q1c(Cause any kind of physical injury) | event(Time)                    |                                |                                |                |
| Frequency<br>Percent<br>Row Pct<br>Col Pct  | Pre-survey                     | Post-survey                    | Re-test                        | Total          |
| no                                          | 23<br>2.08<br>28.05<br>6.20    | 36<br>3.25<br>43.90<br>9.86    | 23<br>2.08<br>28.05<br>6.20    | 82<br>7.41     |
| YES                                         | 313<br>28.27<br>33.19<br>84.37 | 322<br>29.09<br>34.15<br>88.22 | 308<br>27.82<br>32.66<br>83.02 | 943<br>85.19   |
| Unsure                                      | 35<br>3.16<br>42.68<br>9.43    | 7<br>0.63<br>8.54<br>1.92      | 40<br>3.61<br>48.78<br>10.78   | 82<br>7.41     |
| Total                                       | 371<br>33.51                   | 365<br>32.97                   | 371<br>33.51                   | 1107<br>100.00 |

| Table 2 of know_q1c by event                      |                                |                                |                        |               |
|---------------------------------------------------|--------------------------------|--------------------------------|------------------------|---------------|
| Controlling for group=Experimental                |                                |                                |                        |               |
| know_q1c(Cause<br>any kind of<br>physical injury) | event(Time)                    |                                |                        |               |
| Frequency<br>Percent<br>Row Pct<br>Col Pct        | Pre-survey                     | Post-survey                    | Re-test                | Total         |
| <b>no</b>                                         | 27<br>3.60<br>42.19<br>7.16    | 37<br>4.93<br>57.81<br>9.92    | 0<br>0.00<br>0.00<br>. | 64<br>8.53    |
| <b>YES</b>                                        | 324<br>43.20<br>49.47<br>85.94 | 331<br>44.13<br>50.53<br>88.74 | 0<br>0.00<br>0.00<br>. | 655<br>87.33  |
| <b>Unsure</b>                                     | 26<br>3.47<br>83.87<br>6.90    | 5<br>0.67<br>16.13<br>1.34     | 0<br>0.00<br>0.00<br>. | 31<br>4.13    |
| <b>Total</b>                                      | 377<br>50.27                   | 373<br>49.73                   | 0<br>0.00              | 750<br>100.00 |

| Knowledge Question 1c correct |           |         |                      |                    |
|-------------------------------|-----------|---------|----------------------|--------------------|
| know_q1c_correct              | Frequency | Percent | Cumulative Frequency | Cumulative Percent |
| no                            | 1711      | 92.14   | 1711                 | 92.14              |
| YES                           | 146       | 7.86    | 1857                 | 100.00             |

| Table 1 of know_q1c_correct by event            |                                |                                |                                |                |
|-------------------------------------------------|--------------------------------|--------------------------------|--------------------------------|----------------|
| Controlling for group=Control                   |                                |                                |                                |                |
| know_q1c_correct(Knowledge Question 1c correct) | event(Time)                    |                                |                                |                |
| Frequency<br>Percent<br>Row Pct<br>Col Pct      | Pre-survey                     | Post-survey                    | Re-test                        | Total          |
| no                                              | 348<br>31.44<br>33.95<br>93.80 | 329<br>29.72<br>32.10<br>90.14 | 348<br>31.44<br>33.95<br>93.80 | 1025<br>92.59  |
| YES                                             | 23<br>2.08<br>28.05<br>6.20    | 36<br>3.25<br>43.90<br>9.86    | 23<br>2.08<br>28.05<br>6.20    | 82<br>7.41     |
| Total                                           | 371<br>33.51                   | 365<br>32.97                   | 371<br>33.51                   | 1107<br>100.00 |

| Table 2 of know_q1c_correct by event            |                                |                                |                        |               |
|-------------------------------------------------|--------------------------------|--------------------------------|------------------------|---------------|
| Controlling for group=Experimental              |                                |                                |                        |               |
| know_q1c_correct(Knowledge Question 1c correct) | event(Time)                    |                                |                        |               |
| Frequency<br>Percent<br>Row Pct<br>Col Pct      | Pre-survey                     | Post-survey                    | Re-test                | Total         |
| no                                              | 350<br>46.67<br>51.02<br>92.84 | 336<br>44.80<br>48.98<br>90.08 | 0<br>0.00<br>0.00<br>. | 686<br>91.47  |
| YES                                             | 27<br>3.60<br>42.19<br>7.16    | 37<br>4.93<br>57.81<br>9.92    | 0<br>0.00<br>0.00<br>. | 64<br>8.53    |
| Total                                           | 377<br>50.27                   | 373<br>49.73                   | 0<br>0.00              | 750<br>100.00 |

| Cause substantial pain from disciplining a child |           |         |                      |                    |
|--------------------------------------------------|-----------|---------|----------------------|--------------------|
| know_q1d                                         | Frequency | Percent | Cumulative Frequency | Cumulative Percent |
| no                                               | 35        | 1.88    | 35                   | 1.88               |
| YES                                              | 1761      | 94.83   | 1796                 | 96.72              |
| Unsure                                           | 61        | 3.28    | 1857                 | 100.00             |

| Table 1 of know_q1d by event                               |                                |                                |                                |                |
|------------------------------------------------------------|--------------------------------|--------------------------------|--------------------------------|----------------|
| Controlling for group=Control                              |                                |                                |                                |                |
| know_q1d(Cause substantial pain from disciplining a child) | event(Time)                    |                                |                                |                |
| Frequency<br>Percent<br>Row Pct<br>Col Pct                 | Pre-survey                     | Post-survey                    | Re-test                        | Total          |
| no                                                         | 9<br>0.81<br>56.25<br>2.43     | 3<br>0.27<br>18.75<br>0.82     | 4<br>0.36<br>25.00<br>1.08     | 16<br>1.45     |
| YES                                                        | 340<br>30.71<br>32.26<br>91.64 | 360<br>32.52<br>34.16<br>98.63 | 354<br>31.98<br>33.59<br>95.42 | 1054<br>95.21  |
| Unsure                                                     | 22<br>1.99<br>59.46<br>5.93    | 2<br>0.18<br>5.41<br>0.55      | 13<br>1.17<br>35.14<br>3.50    | 37<br>3.34     |
| Total                                                      | 371<br>33.51                   | 365<br>32.97                   | 371<br>33.51                   | 1107<br>100.00 |

| Table 2 of know_q1d by event                                        |                                |                                |                        |               |
|---------------------------------------------------------------------|--------------------------------|--------------------------------|------------------------|---------------|
| Controlling for group=Experimental                                  |                                |                                |                        |               |
| know_q1d(Cause<br>substantial pain<br>from disciplining<br>a child) | event(Time)                    |                                |                        |               |
| Frequency<br>Percent<br>Row Pct<br>Col Pct                          | Pre-survey                     | Post-survey                    | Re-test                | Total         |
| <b>no</b>                                                           | 13<br>1.73<br>68.42<br>3.45    | 6<br>0.80<br>31.58<br>1.61     | 0<br>0.00<br>0.00<br>. | 19<br>2.53    |
| <b>YES</b>                                                          | 342<br>45.60<br>48.37<br>90.72 | 365<br>48.67<br>51.63<br>97.86 | 0<br>0.00<br>0.00<br>. | 707<br>94.27  |
| <b>Unsure</b>                                                       | 22<br>2.93<br>91.67<br>5.84    | 2<br>0.27<br>8.33<br>0.54      | 0<br>0.00<br>0.00<br>. | 24<br>3.20    |
| <b>Total</b>                                                        | 377<br>50.27                   | 373<br>49.73                   | 0<br>0.00              | 750<br>100.00 |

| Knowledge Question 1d correct |           |         |                      |                    |
|-------------------------------|-----------|---------|----------------------|--------------------|
| know_q1d_correct              | Frequency | Percent | Cumulative Frequency | Cumulative Percent |
| no                            | 96        | 5.17    | 96                   | 5.17               |
| YES                           | 1761      | 94.83   | 1857                 | 100.00             |

| Table 1 of know_q1d_correct by event            |                                |                                |                                |                |
|-------------------------------------------------|--------------------------------|--------------------------------|--------------------------------|----------------|
| Controlling for group=Control                   |                                |                                |                                |                |
| know_q1d_correct(Knowledge Question 1d correct) | event(Time)                    |                                |                                |                |
| Frequency<br>Percent<br>Row Pct<br>Col Pct      | Pre-survey                     | Post-survey                    | Re-test                        | Total          |
| no                                              | 31<br>2.80<br>58.49<br>8.36    | 5<br>0.45<br>9.43<br>1.37      | 17<br>1.54<br>32.08<br>4.58    | 53<br>4.79     |
| YES                                             | 340<br>30.71<br>32.26<br>91.64 | 360<br>32.52<br>34.16<br>98.63 | 354<br>31.98<br>33.59<br>95.42 | 1054<br>95.21  |
| Total                                           | 371<br>33.51                   | 365<br>32.97                   | 371<br>33.51                   | 1107<br>100.00 |

| Table 2 of know_q1d_correct by event            |                                |                                |                        |               |
|-------------------------------------------------|--------------------------------|--------------------------------|------------------------|---------------|
| Controlling for group=Experimental              |                                |                                |                        |               |
| know_q1d_correct(Knowledge Question 1d correct) | event(Time)                    |                                |                        |               |
| Frequency<br>Percent<br>Row Pct<br>Col Pct      | Pre-survey                     | Post-survey                    | Re-test                | Total         |
| no                                              | 35<br>4.67<br>81.40<br>9.28    | 8<br>1.07<br>18.60<br>2.14     | 0<br>0.00<br>0.00<br>. | 43<br>5.73    |
| YES                                             | 342<br>45.60<br>48.37<br>90.72 | 365<br>48.67<br>51.63<br>97.86 | 0<br>0.00<br>0.00<br>. | 707<br>94.27  |
| Total                                           | 377<br>50.27                   | 373<br>49.73                   | 0<br>0.00              | 750<br>100.00 |

| Impair physical functioning from disciplining a child |           |         |                      |                    |
|-------------------------------------------------------|-----------|---------|----------------------|--------------------|
| know_q1e                                              | Frequency | Percent | Cumulative Frequency | Cumulative Percent |
| no                                                    | 24        | 1.29    | 24                   | 1.29               |
| YES                                                   | 1768      | 95.21   | 1792                 | 96.50              |
| Unsure                                                | 65        | 3.50    | 1857                 | 100.00             |

| Table 1 of know_q1e by event                                    |                                |                                |                                |                |
|-----------------------------------------------------------------|--------------------------------|--------------------------------|--------------------------------|----------------|
| Controlling for group=Control                                   |                                |                                |                                |                |
| know_q1e(Impair physical functioning from disciplining a child) | event(Time)                    |                                |                                |                |
| Frequency<br>Percent<br>Row Pct<br>Col Pct                      | Pre-survey                     | Post-survey                    | Re-test                        | Total          |
| no                                                              | 6<br>0.54<br>46.15<br>1.62     | 2<br>0.18<br>15.38<br>0.55     | 5<br>0.45<br>38.46<br>1.35     | 13<br>1.17     |
| YES                                                             | 344<br>31.07<br>32.45<br>92.72 | 361<br>32.61<br>34.06<br>98.90 | 355<br>32.07<br>33.49<br>95.69 | 1060<br>95.75  |
| Unsure                                                          | 21<br>1.90<br>61.76<br>5.66    | 2<br>0.18<br>5.88<br>0.55      | 11<br>0.99<br>32.35<br>2.96    | 34<br>3.07     |
| Total                                                           | 371<br>33.51                   | 365<br>32.97                   | 371<br>33.51                   | 1107<br>100.00 |

| Table 2 of know_q1e by event                                                |                                |                                |                        |               |
|-----------------------------------------------------------------------------|--------------------------------|--------------------------------|------------------------|---------------|
| Controlling for group=Experimental                                          |                                |                                |                        |               |
| know_q1e(Impair<br>physical<br>functioning from<br>disciplining a<br>child) | event(Time)                    |                                |                        |               |
| Frequency<br>Percent<br>Row Pct<br>Col Pct                                  | Pre-survey                     | Post-survey                    | Re-test                | Total         |
| <b>no</b>                                                                   | 8<br>1.07<br>72.73<br>2.12     | 3<br>0.40<br>27.27<br>0.80     | 0<br>0.00<br>0.00<br>. | 11<br>1.47    |
| <b>YES</b>                                                                  | 340<br>45.33<br>48.02<br>90.19 | 368<br>49.07<br>51.98<br>98.66 | 0<br>0.00<br>0.00<br>. | 708<br>94.40  |
| <b>Unsure</b>                                                               | 29<br>3.87<br>93.55<br>7.69    | 2<br>0.27<br>6.45<br>0.54      | 0<br>0.00<br>0.00<br>. | 31<br>4.13    |
| <b>Total</b>                                                                | 377<br>50.27                   | 373<br>49.73                   | 0<br>0.00              | 750<br>100.00 |

| Knowledge Question 1e correct |           |         |                      |                    |
|-------------------------------|-----------|---------|----------------------|--------------------|
| know_q1e_correct              | Frequency | Percent | Cumulative Frequency | Cumulative Percent |
| no                            | 89        | 4.79    | 89                   | 4.79               |
| YES                           | 1768      | 95.21   | 1857                 | 100.00             |

| Table 1 of know_q1e_correct by event            |                                |                                |                                |                |
|-------------------------------------------------|--------------------------------|--------------------------------|--------------------------------|----------------|
| Controlling for group=Control                   |                                |                                |                                |                |
| know_q1e_correct(Knowledge Question 1e correct) | event(Time)                    |                                |                                |                |
| Frequency<br>Percent<br>Row Pct<br>Col Pct      | Pre-survey                     | Post-survey                    | Re-test                        | Total          |
| no                                              | 27<br>2.44<br>57.45<br>7.28    | 4<br>0.36<br>8.51<br>1.10      | 16<br>1.45<br>34.04<br>4.31    | 47<br>4.25     |
| YES                                             | 344<br>31.07<br>32.45<br>92.72 | 361<br>32.61<br>34.06<br>98.90 | 355<br>32.07<br>33.49<br>95.69 | 1060<br>95.75  |
| Total                                           | 371<br>33.51                   | 365<br>32.97                   | 371<br>33.51                   | 1107<br>100.00 |

| Table 2 of know_q1e_correct by event            |                                |                                |                        |               |
|-------------------------------------------------|--------------------------------|--------------------------------|------------------------|---------------|
| Controlling for group=Experimental              |                                |                                |                        |               |
| know_q1e_correct(Knowledge Question 1e correct) | event(Time)                    |                                |                        |               |
| Frequency<br>Percent<br>Row Pct<br>Col Pct      | Pre-survey                     | Post-survey                    | Re-test                | Total         |
| no                                              | 37<br>4.93<br>88.10<br>9.81    | 5<br>0.67<br>11.90<br>1.34     | 0<br>0.00<br>0.00<br>. | 42<br>5.60    |
| YES                                             | 340<br>45.33<br>48.02<br>90.19 | 368<br>49.07<br>51.98<br>98.66 | 0<br>0.00<br>0.00<br>. | 708<br>94.40  |
| Total                                           | 377<br>50.27                   | 373<br>49.73                   | 0<br>0.00              | 750<br>100.00 |

| Forcefully slap a child under one year of age |           |         |                      |                    |
|-----------------------------------------------|-----------|---------|----------------------|--------------------|
| know_q1f                                      | Frequency | Percent | Cumulative Frequency | Cumulative Percent |
| no                                            | 35        | 1.88    | 35                   | 1.88               |
| YES                                           | 1777      | 95.69   | 1812                 | 97.58              |
| Unsure                                        | 45        | 2.42    | 1857                 | 100.00             |

| Table 1 of know_q1f by event                            |                                |                                |                                |                |
|---------------------------------------------------------|--------------------------------|--------------------------------|--------------------------------|----------------|
| Controlling for group=Control                           |                                |                                |                                |                |
| know_q1f(Forcefully slap a child under one year of age) | event(Time)                    |                                |                                |                |
| Frequency<br>Percent<br>Row Pct<br>Col Pct              | Pre-survey                     | Post-survey                    | Re-test                        | Total          |
| no                                                      | 10<br>0.90<br>62.50<br>2.70    | 1<br>0.09<br>6.25<br>0.27      | 5<br>0.45<br>31.25<br>1.35     | 16<br>1.45     |
| YES                                                     | 347<br>31.35<br>32.46<br>93.53 | 363<br>32.79<br>33.96<br>99.45 | 359<br>32.43<br>33.58<br>96.77 | 1069<br>96.57  |
| Unsure                                                  | 14<br>1.26<br>63.64<br>3.77    | 1<br>0.09<br>4.55<br>0.27      | 7<br>0.63<br>31.82<br>1.89     | 22<br>1.99     |
| Total                                                   | 371<br>33.51                   | 365<br>32.97                   | 371<br>33.51                   | 1107<br>100.00 |

| Table 2 of know_q1f by event                                  |                                |                                |                        |               |
|---------------------------------------------------------------|--------------------------------|--------------------------------|------------------------|---------------|
| Controlling for group=Experimental                            |                                |                                |                        |               |
| know_q1f(Forcefully<br>slap a child under<br>one year of age) | event(Time)                    |                                |                        |               |
| Frequency<br>Percent<br>Row Pct<br>Col Pct                    | Pre-survey                     | Post-survey                    | Re-test                | Total         |
| <b>no</b>                                                     | 15<br>2.00<br>78.95<br>3.98    | 4<br>0.53<br>21.05<br>1.07     | 0<br>0.00<br>0.00<br>. | 19<br>2.53    |
| <b>YES</b>                                                    | 340<br>45.33<br>48.02<br>90.19 | 368<br>49.07<br>51.98<br>98.66 | 0<br>0.00<br>0.00<br>. | 708<br>94.40  |
| <b>Unsure</b>                                                 | 22<br>2.93<br>95.65<br>5.84    | 1<br>0.13<br>4.35<br>0.27      | 0<br>0.00<br>0.00<br>. | 23<br>3.07    |
| <b>Total</b>                                                  | 377<br>50.27                   | 373<br>49.73                   | 0<br>0.00              | 750<br>100.00 |

| Knowledge Question 1f correct |           |         |                      |                    |
|-------------------------------|-----------|---------|----------------------|--------------------|
| know_q1f_correct              | Frequency | Percent | Cumulative Frequency | Cumulative Percent |
| no                            | 80        | 4.31    | 80                   | 4.31               |
| YES                           | 1777      | 95.69   | 1857                 | 100.00             |

| Table 1 of know_q1f_correct by event            |                                |                                |                                |                |
|-------------------------------------------------|--------------------------------|--------------------------------|--------------------------------|----------------|
| Controlling for group=Control                   |                                |                                |                                |                |
| know_q1f_correct(Knowledge Question 1f correct) | event(Time)                    |                                |                                |                |
| Frequency<br>Percent<br>Row Pct<br>Col Pct      | Pre-survey                     | Post-survey                    | Re-test                        | Total          |
| no                                              | 24<br>2.17<br>63.16<br>6.47    | 2<br>0.18<br>5.26<br>0.55      | 12<br>1.08<br>31.58<br>3.23    | 38<br>3.43     |
| YES                                             | 347<br>31.35<br>32.46<br>93.53 | 363<br>32.79<br>33.96<br>99.45 | 359<br>32.43<br>33.58<br>96.77 | 1069<br>96.57  |
| Total                                           | 371<br>33.51                   | 365<br>32.97                   | 371<br>33.51                   | 1107<br>100.00 |

| Table 2 of know_q1f_correct by event            |                                |                                |                        |               |
|-------------------------------------------------|--------------------------------|--------------------------------|------------------------|---------------|
| Controlling for group=Experimental              |                                |                                |                        |               |
| know_q1f_correct(Knowledge Question 1f correct) | event(Time)                    |                                |                        |               |
| Frequency<br>Percent<br>Row Pct<br>Col Pct      | Pre-survey                     | Post-survey                    | Re-test                | Total         |
| no                                              | 37<br>4.93<br>88.10<br>9.81    | 5<br>0.67<br>11.90<br>1.34     | 0<br>0.00<br>0.00<br>. | 42<br>5.60    |
| YES                                             | 340<br>45.33<br>48.02<br>90.19 | 368<br>49.07<br>51.98<br>98.66 | 0<br>0.00<br>0.00<br>. | 708<br>94.40  |
| Total                                           | 377<br>50.27                   | 373<br>49.73                   | 0<br>0.00              | 750<br>100.00 |

| Expose a child to domestic violence |           |         |                      |                    |
|-------------------------------------|-----------|---------|----------------------|--------------------|
| know_q1g                            | Frequency | Percent | Cumulative Frequency | Cumulative Percent |
| no                                  | 230       | 12.39   | 230                  | 12.39              |
| YES                                 | 1431      | 77.06   | 1661                 | 89.45              |
| Unsure                              | 196       | 10.55   | 1857                 | 100.00             |

| Table 1 of know_q1g by event                  |                                |                                |                                |                |
|-----------------------------------------------|--------------------------------|--------------------------------|--------------------------------|----------------|
| Controlling for group=Control                 |                                |                                |                                |                |
| know_q1g(Expose a child to domestic violence) | event(Time)                    |                                |                                |                |
| Frequency<br>Percent<br>Row Pct<br>Col Pct    | Pre-survey                     | Post-survey                    | Re-test                        | Total          |
| no                                            | 31<br>2.80<br>24.41<br>8.36    | 71<br>6.41<br>55.91<br>19.45   | 25<br>2.26<br>19.69<br>6.74    | 127<br>11.47   |
| YES                                           | 277<br>25.02<br>32.25<br>74.66 | 286<br>25.84<br>33.29<br>78.36 | 296<br>26.74<br>34.46<br>79.78 | 859<br>77.60   |
| Unsure                                        | 63<br>5.69<br>52.07<br>16.98   | 8<br>0.72<br>6.61<br>2.19      | 50<br>4.52<br>41.32<br>13.48   | 121<br>10.93   |
| Total                                         | 371<br>33.51                   | 365<br>32.97                   | 371<br>33.51                   | 1107<br>100.00 |

| Table 2 of know_q1g by event                        |                                |                                |                        |               |
|-----------------------------------------------------|--------------------------------|--------------------------------|------------------------|---------------|
| Controlling for group=Experimental                  |                                |                                |                        |               |
| know_q1g(Expose<br>a child to domestic<br>violence) | event(Time)                    |                                |                        |               |
| Frequency<br>Percent<br>Row Pct<br>Col Pct          | Pre-survey                     | Post-survey                    | Re-test                | Total         |
| <b>no</b>                                           | 27<br>3.60<br>26.21<br>7.16    | 76<br>10.13<br>73.79<br>20.38  | 0<br>0.00<br>0.00<br>. | 103<br>13.73  |
| <b>YES</b>                                          | 282<br>37.60<br>49.30<br>74.80 | 290<br>38.67<br>50.70<br>77.75 | 0<br>0.00<br>0.00<br>. | 572<br>76.27  |
| <b>Unsure</b>                                       | 68<br>9.07<br>90.67<br>18.04   | 7<br>0.93<br>9.33<br>1.88      | 0<br>0.00<br>0.00<br>. | 75<br>10.00   |
| <b>Total</b>                                        | 377<br>50.27                   | 373<br>49.73                   | 0<br>0.00              | 750<br>100.00 |

| Knowledge Question 1g correct |           |         |                      |                    |
|-------------------------------|-----------|---------|----------------------|--------------------|
| know_q1g_correct              | Frequency | Percent | Cumulative Frequency | Cumulative Percent |
| no                            | 1627      | 87.61   | 1627                 | 87.61              |
| YES                           | 230       | 12.39   | 1857                 | 100.00             |

| Table 1 of know_q1g_correct by event            |                                |                                |                                |                |
|-------------------------------------------------|--------------------------------|--------------------------------|--------------------------------|----------------|
| Controlling for group=Control                   |                                |                                |                                |                |
| know_q1g_correct(Knowledge Question 1g correct) | event(Time)                    |                                |                                |                |
| Frequency<br>Percent<br>Row Pct<br>Col Pct      | Pre-survey                     | Post-survey                    | Re-test                        | Total          |
| no                                              | 340<br>30.71<br>34.69<br>91.64 | 294<br>26.56<br>30.00<br>80.55 | 346<br>31.26<br>35.31<br>93.26 | 980<br>88.53   |
| YES                                             | 31<br>2.80<br>24.41<br>8.36    | 71<br>6.41<br>55.91<br>19.45   | 25<br>2.26<br>19.69<br>6.74    | 127<br>11.47   |
| Total                                           | 371<br>33.51                   | 365<br>32.97                   | 371<br>33.51                   | 1107<br>100.00 |

| Table 2 of know_q1g_correct by event            |                                |                                |                        |               |
|-------------------------------------------------|--------------------------------|--------------------------------|------------------------|---------------|
| Controlling for group=Experimental              |                                |                                |                        |               |
| know_q1g_correct(Knowledge Question 1g correct) | event(Time)                    |                                |                        |               |
| Frequency<br>Percent<br>Row Pct<br>Col Pct      | Pre-survey                     | Post-survey                    | Re-test                | Total         |
| no                                              | 350<br>46.67<br>54.10<br>92.84 | 297<br>39.60<br>45.90<br>79.62 | 0<br>0.00<br>0.00<br>. | 647<br>86.27  |
| YES                                             | 27<br>3.60<br>26.21<br>7.16    | 76<br>10.13<br>73.79<br>20.38  | 0<br>0.00<br>0.00<br>. | 103<br>13.73  |
| Total                                           | 377<br>50.27                   | 373<br>49.73                   | 0<br>0.00              | 750<br>100.00 |

| Any bruising in an infant who hasn't started pulling to stand |           |         |                      |                    |
|---------------------------------------------------------------|-----------|---------|----------------------|--------------------|
| know_q2a                                                      | Frequency | Percent | Cumulative Frequency | Cumulative Percent |
| no                                                            | 71        | 3.83    | 71                   | 3.83               |
| YES                                                           | 1662      | 89.55   | 1733                 | 93.37              |
| Unsure                                                        | 123       | 6.63    | 1856                 | 100.00             |
| Frequency Missing = 1                                         |           |         |                      |                    |

| Table 1 of know_q2a by event                                            |                                |                                |                                |                |
|-------------------------------------------------------------------------|--------------------------------|--------------------------------|--------------------------------|----------------|
| Controlling for group=Control                                           |                                |                                |                                |                |
| know_q2a(Any bruising in an infant who hasn't started pulling to stand) | event(Time)                    |                                |                                |                |
| Frequency<br>Percent<br>Row Pct<br>Col Pct                              | Pre-survey                     | Post-survey                    | Re-test                        | Total          |
| no                                                                      | 20<br>1.81<br>45.45<br>5.39    | 4<br>0.36<br>9.09<br>1.10      | 20<br>1.81<br>45.45<br>5.39    | 44<br>3.97     |
| YES                                                                     | 308<br>27.82<br>31.27<br>83.02 | 360<br>32.52<br>36.55<br>98.63 | 317<br>28.64<br>32.18<br>85.44 | 985<br>88.98   |
| Unsure                                                                  | 43<br>3.88<br>55.13<br>11.59   | 1<br>0.09<br>1.28<br>0.27      | 34<br>3.07<br>43.59<br>9.16    | 78<br>7.05     |
| Total                                                                   | 371<br>33.51                   | 365<br>32.97                   | 371<br>33.51                   | 1107<br>100.00 |

| Table 2 of know_q2a by event                                            |                                |                                |                        |               |
|-------------------------------------------------------------------------|--------------------------------|--------------------------------|------------------------|---------------|
| Controlling for group=Experimental                                      |                                |                                |                        |               |
| know_q2a(Any bruising in an infant who hasn't started pulling to stand) | event(Time)                    |                                |                        |               |
| Frequency<br>Percent<br>Row Pct<br>Col Pct                              | Pre-survey                     | Post-survey                    | Re-test                | Total         |
| <b>no</b>                                                               | 19<br>2.54<br>70.37<br>5.05    | 8<br>1.07<br>29.63<br>2.14     | 0<br>0.00<br>0.00<br>. | 27<br>3.60    |
| <b>YES</b>                                                              | 316<br>42.19<br>46.68<br>84.04 | 361<br>48.20<br>53.32<br>96.78 | 0<br>0.00<br>0.00<br>. | 677<br>90.39  |
| <b>Unsure</b>                                                           | 41<br>5.47<br>91.11<br>10.90   | 4<br>0.53<br>8.89<br>1.07      | 0<br>0.00<br>0.00<br>. | 45<br>6.01    |
| <b>Total</b>                                                            | 376<br>50.20                   | 373<br>49.80                   | 0<br>0.00              | 749<br>100.00 |
| Frequency Missing = 1                                                   |                                |                                |                        |               |

| Knowledge Question 2a correct |           |         |                      |                    |
|-------------------------------|-----------|---------|----------------------|--------------------|
| know_q2a_correct              | Frequency | Percent | Cumulative Frequency | Cumulative Percent |
| no                            | 194       | 10.45   | 194                  | 10.45              |
| YES                           | 1662      | 89.55   | 1856                 | 100.00             |
| Frequency Missing = 1         |           |         |                      |                    |

| Table 1 of know_q2a_correct by event            |                                |                                |                                |                |
|-------------------------------------------------|--------------------------------|--------------------------------|--------------------------------|----------------|
| Controlling for group=Control                   |                                |                                |                                |                |
| know_q2a_correct(Knowledge Question 2a correct) | event(Time)                    |                                |                                |                |
| Frequency<br>Percent<br>Row Pct<br>Col Pct      | Pre-survey                     | Post-survey                    | Re-test                        | Total          |
| no                                              | 63<br>5.69<br>51.64<br>16.98   | 5<br>0.45<br>4.10<br>1.37      | 54<br>4.88<br>44.26<br>14.56   | 122<br>11.02   |
| YES                                             | 308<br>27.82<br>31.27<br>83.02 | 360<br>32.52<br>36.55<br>98.63 | 317<br>28.64<br>32.18<br>85.44 | 985<br>88.98   |
| Total                                           | 371<br>33.51                   | 365<br>32.97                   | 371<br>33.51                   | 1107<br>100.00 |

| Table 2 of know_q2a_correct by event            |                                |                                |                        |               |
|-------------------------------------------------|--------------------------------|--------------------------------|------------------------|---------------|
| Controlling for group=Experimental              |                                |                                |                        |               |
| know_q2a_correct(Knowledge Question 2a correct) | event(Time)                    |                                |                        |               |
| Frequency<br>Percent<br>Row Pct<br>Col Pct      | Pre-survey                     | Post-survey                    | Re-test                | Total         |
| no                                              | 60<br>8.01<br>83.33<br>15.96   | 12<br>1.60<br>16.67<br>3.22    | 0<br>0.00<br>0.00<br>. | 72<br>9.61    |
| YES                                             | 316<br>42.19<br>46.68<br>84.04 | 361<br>48.20<br>53.32<br>96.78 | 0<br>0.00<br>0.00<br>. | 677<br>90.39  |
| Total                                           | 376<br>50.20                   | 373<br>49.80                   | 0<br>0.00              | 749<br>100.00 |
| Frequency Missing = 1                           |                                |                                |                        |               |

| Any bruising in a child younger than 5 years old |           |         |                      |                    |
|--------------------------------------------------|-----------|---------|----------------------|--------------------|
| know_q2b                                         | Frequency | Percent | Cumulative Frequency | Cumulative Percent |
| no                                               | 876       | 47.20   | 876                  | 47.20              |
| YES                                              | 686       | 36.96   | 1562                 | 84.16              |
| Unsure                                           | 294       | 15.84   | 1856                 | 100.00             |
| Frequency Missing = 1                            |           |         |                      |                    |

| Table 1 of know_q2b by event                               |                                |                                |                                |                |
|------------------------------------------------------------|--------------------------------|--------------------------------|--------------------------------|----------------|
| Controlling for group=Control                              |                                |                                |                                |                |
| know_q2b(Any bruising in a child younger than 5 years old) | event(Time)                    |                                |                                |                |
| Frequency<br>Percent<br>Row Pct<br>Col Pct                 | Pre-survey                     | Post-survey                    | Re-test                        | Total          |
| no                                                         | 165<br>14.91<br>32.80<br>44.47 | 188<br>16.98<br>37.38<br>51.51 | 150<br>13.55<br>29.82<br>40.43 | 503<br>45.44   |
| YES                                                        | 120<br>10.84<br>28.24<br>32.35 | 162<br>14.63<br>38.12<br>44.38 | 143<br>12.92<br>33.65<br>38.54 | 425<br>38.39   |
| Unsure                                                     | 86<br>7.77<br>48.04<br>23.18   | 15<br>1.36<br>8.38<br>4.11     | 78<br>7.05<br>43.58<br>21.02   | 179<br>16.17   |
| Total                                                      | 371<br>33.51                   | 365<br>32.97                   | 371<br>33.51                   | 1107<br>100.00 |

| Table 2 of know_q2b by event                                           |                                |                                |                        |               |
|------------------------------------------------------------------------|--------------------------------|--------------------------------|------------------------|---------------|
| Controlling for group=Experimental                                     |                                |                                |                        |               |
| know_q2b(Any<br>bruising in a<br>child younger<br>than 5 years<br>old) | event(Time)                    |                                |                        |               |
| Frequency<br>Percent<br>Row Pct<br>Col Pct                             | Pre-survey                     | Post-survey                    | Re-test                | Total         |
| <b>no</b>                                                              | 167<br>22.30<br>44.77<br>44.41 | 206<br>27.50<br>55.23<br>55.23 | 0<br>0.00<br>0.00<br>. | 373<br>49.80  |
| <b>YES</b>                                                             | 116<br>15.49<br>44.44<br>30.85 | 145<br>19.36<br>55.56<br>38.87 | 0<br>0.00<br>0.00<br>. | 261<br>34.85  |
| <b>Unsure</b>                                                          | 93<br>12.42<br>80.87<br>24.73  | 22<br>2.94<br>19.13<br>5.90    | 0<br>0.00<br>0.00<br>. | 115<br>15.35  |
| <b>Total</b>                                                           | 376<br>50.20                   | 373<br>49.80                   | 0<br>0.00              | 749<br>100.00 |
| Frequency Missing = 1                                                  |                                |                                |                        |               |

| Knowledge Question 2b correct |           |         |                      |                    |
|-------------------------------|-----------|---------|----------------------|--------------------|
| know_q2b_correct              | Frequency | Percent | Cumulative Frequency | Cumulative Percent |
| no                            | 980       | 52.80   | 980                  | 52.80              |
| YES                           | 876       | 47.20   | 1856                 | 100.00             |
| Frequency Missing = 1         |           |         |                      |                    |

| Table 1 of know_q2b_correct by event            |                                |                                |                                |                |
|-------------------------------------------------|--------------------------------|--------------------------------|--------------------------------|----------------|
| Controlling for group=Control                   |                                |                                |                                |                |
| know_q2b_correct(Knowledge Question 2b correct) | event(Time)                    |                                |                                |                |
| Frequency<br>Percent<br>Row Pct<br>Col Pct      | Pre-survey                     | Post-survey                    | Re-test                        | Total          |
| no                                              | 206<br>18.61<br>34.11<br>55.53 | 177<br>15.99<br>29.30<br>48.49 | 221<br>19.96<br>36.59<br>59.57 | 604<br>54.56   |
| YES                                             | 165<br>14.91<br>32.80<br>44.47 | 188<br>16.98<br>37.38<br>51.51 | 150<br>13.55<br>29.82<br>40.43 | 503<br>45.44   |
| Total                                           | 371<br>33.51                   | 365<br>32.97                   | 371<br>33.51                   | 1107<br>100.00 |

| Table 2 of know_q2b_correct by event            |                                |                                |                        |               |
|-------------------------------------------------|--------------------------------|--------------------------------|------------------------|---------------|
| Controlling for group=Experimental              |                                |                                |                        |               |
| know_q2b_correct(Knowledge Question 2b correct) | event(Time)                    |                                |                        |               |
| Frequency<br>Percent<br>Row Pct<br>Col Pct      | Pre-survey                     | Post-survey                    | Re-test                | Total         |
| no                                              | 209<br>27.90<br>55.59<br>55.59 | 167<br>22.30<br>44.41<br>44.77 | 0<br>0.00<br>0.00<br>. | 376<br>50.20  |
| YES                                             | 167<br>22.30<br>44.77<br>44.41 | 206<br>27.50<br>55.23<br>55.23 | 0<br>0.00<br>0.00<br>. | 373<br>49.80  |
| Total                                           | 376<br>50.20                   | 373<br>49.80                   | 0<br>0.00              | 749<br>100.00 |
| Frequency Missing = 1                           |                                |                                |                        |               |

| Any bruising from spanking |           |         |                      |                    |
|----------------------------|-----------|---------|----------------------|--------------------|
| know_q2c                   | Frequency | Percent | Cumulative Frequency | Cumulative Percent |
| no                         | 51        | 2.75    | 51                   | 2.75               |
| YES                        | 1714      | 92.35   | 1765                 | 95.10              |
| Unsure                     | 91        | 4.90    | 1856                 | 100.00             |
| Frequency Missing = 1      |           |         |                      |                    |

| Table 1 of know_q2c by event               |                                |                                |                                |                |
|--------------------------------------------|--------------------------------|--------------------------------|--------------------------------|----------------|
| Controlling for group=Control              |                                |                                |                                |                |
| know_q2c(Any bruising from spanking)       | event(Time)                    |                                |                                |                |
| Frequency<br>Percent<br>Row Pct<br>Col Pct | Pre-survey                     | Post-survey                    | Re-test                        | Total          |
| no                                         | 7<br>0.63<br>38.89<br>1.89     | 7<br>0.63<br>38.89<br>1.92     | 4<br>0.36<br>22.22<br>1.08     | 18<br>1.63     |
| YES                                        | 337<br>30.44<br>32.72<br>90.84 | 353<br>31.89<br>34.27<br>96.71 | 340<br>30.71<br>33.01<br>91.64 | 1030<br>93.04  |
| Unsure                                     | 27<br>2.44<br>45.76<br>7.28    | 5<br>0.45<br>8.47<br>1.37      | 27<br>2.44<br>45.76<br>7.28    | 59<br>5.33     |
| Total                                      | 371<br>33.51                   | 365<br>32.97                   | 371<br>33.51                   | 1107<br>100.00 |

| Table 2 of know_q2c by event               |                                |                                |                        |               |
|--------------------------------------------|--------------------------------|--------------------------------|------------------------|---------------|
| Controlling for group=Experimental         |                                |                                |                        |               |
| know_q2c(Any<br>bruising from<br>spanking) | event(Time)                    |                                |                        |               |
| Frequency<br>Percent<br>Row Pct<br>Col Pct | Pre-survey                     | Post-survey                    | Re-test                | Total         |
| <b>no</b>                                  | 16<br>2.14<br>48.48<br>4.26    | 17<br>2.27<br>51.52<br>4.56    | 0<br>0.00<br>0.00<br>. | 33<br>4.41    |
| <b>YES</b>                                 | 332<br>44.33<br>48.54<br>88.30 | 352<br>47.00<br>51.46<br>94.37 | 0<br>0.00<br>0.00<br>. | 684<br>91.32  |
| <b>Unsure</b>                              | 28<br>3.74<br>87.50<br>7.45    | 4<br>0.53<br>12.50<br>1.07     | 0<br>0.00<br>0.00<br>. | 32<br>4.27    |
| <b>Total</b>                               | 376<br>50.20                   | 373<br>49.80                   | 0<br>0.00              | 749<br>100.00 |
| Frequency Missing = 1                      |                                |                                |                        |               |

| Knowledge Question 2c correct |           |         |                      |                    |
|-------------------------------|-----------|---------|----------------------|--------------------|
| know_q2c_correct              | Frequency | Percent | Cumulative Frequency | Cumulative Percent |
| no                            | 142       | 7.65    | 142                  | 7.65               |
| YES                           | 1714      | 92.35   | 1856                 | 100.00             |
| Frequency Missing = 1         |           |         |                      |                    |

| Table 1 of know_q2c_correct by event            |                                |                                |                                |                |
|-------------------------------------------------|--------------------------------|--------------------------------|--------------------------------|----------------|
| Controlling for group=Control                   |                                |                                |                                |                |
| know_q2c_correct(Knowledge Question 2c correct) | event(Time)                    |                                |                                |                |
| Frequency<br>Percent<br>Row Pct<br>Col Pct      | Pre-survey                     | Post-survey                    | Re-test                        | Total          |
| no                                              | 34<br>3.07<br>44.16<br>9.16    | 12<br>1.08<br>15.58<br>3.29    | 31<br>2.80<br>40.26<br>8.36    | 77<br>6.96     |
| YES                                             | 337<br>30.44<br>32.72<br>90.84 | 353<br>31.89<br>34.27<br>96.71 | 340<br>30.71<br>33.01<br>91.64 | 1030<br>93.04  |
| Total                                           | 371<br>33.51                   | 365<br>32.97                   | 371<br>33.51                   | 1107<br>100.00 |

| Table 2 of know_q2c_correct by event            |                                |                                |                        |               |
|-------------------------------------------------|--------------------------------|--------------------------------|------------------------|---------------|
| Controlling for group=Experimental              |                                |                                |                        |               |
| know_q2c_correct(Knowledge Question 2c correct) | event(Time)                    |                                |                        |               |
| Frequency<br>Percent<br>Row Pct<br>Col Pct      | Pre-survey                     | Post-survey                    | Re-test                | Total         |
| no                                              | 44<br>5.87<br>67.69<br>11.70   | 21<br>2.80<br>32.31<br>5.63    | 0<br>0.00<br>0.00<br>. | 65<br>8.68    |
| YES                                             | 332<br>44.33<br>48.54<br>88.30 | 352<br>47.00<br>51.46<br>94.37 | 0<br>0.00<br>0.00<br>. | 684<br>91.32  |
| Total                                           | 376<br>50.20                   | 373<br>49.80                   | 0<br>0.00              | 749<br>100.00 |
| Frequency Missing = 1                           |                                |                                |                        |               |

| Bruising on toddler's shins |           |         |                      |                    |
|-----------------------------|-----------|---------|----------------------|--------------------|
| know_q2d                    | Frequency | Percent | Cumulative Frequency | Cumulative Percent |
| no                          | 1091      | 58.78   | 1091                 | 58.78              |
| YES                         | 476       | 25.65   | 1567                 | 84.43              |
| Unsure                      | 289       | 15.57   | 1856                 | 100.00             |
| Frequency Missing = 1       |           |         |                      |                    |

| Table 1 of know_q2d by event               |                                |                                |                                |                |
|--------------------------------------------|--------------------------------|--------------------------------|--------------------------------|----------------|
| Controlling for group=Control              |                                |                                |                                |                |
| know_q2d(Bruising on toddler's shins)      | event(Time)                    |                                |                                |                |
| Frequency<br>Percent<br>Row Pct<br>Col Pct | Pre-survey                     | Post-survey                    | Re-test                        | Total          |
| no                                         | 226<br>20.42<br>34.77<br>60.92 | 211<br>19.06<br>32.46<br>57.81 | 213<br>19.24<br>32.77<br>57.41 | 650<br>58.72   |
| YES                                        | 65<br>5.87<br>23.64<br>17.52   | 131<br>11.83<br>47.64<br>35.89 | 79<br>7.14<br>28.73<br>21.29   | 275<br>24.84   |
| Unsure                                     | 80<br>7.23<br>43.96<br>21.56   | 23<br>2.08<br>12.64<br>6.30    | 79<br>7.14<br>43.41<br>21.29   | 182<br>16.44   |
| Total                                      | 371<br>33.51                   | 365<br>32.97                   | 371<br>33.51                   | 1107<br>100.00 |

| Table 2 of know_q2d by event               |             |             |         |        |
|--------------------------------------------|-------------|-------------|---------|--------|
| Controlling for group=Experimental         |             |             |         |        |
| know_q2d(Bruising<br>on toddler's shins)   | event(Time) |             |         |        |
| Frequency<br>Percent<br>Row Pct<br>Col Pct | Pre-survey  | Post-survey | Re-test | Total  |
| <b>no</b>                                  | 218         | 223         | 0       | 441    |
|                                            | 29.11       | 29.77       | 0.00    | 58.88  |
|                                            | 49.43       | 50.57       | 0.00    |        |
|                                            | 57.98       | 59.79       | .       |        |
| <b>YES</b>                                 | 75          | 126         | 0       | 201    |
|                                            | 10.01       | 16.82       | 0.00    | 26.84  |
|                                            | 37.31       | 62.69       | 0.00    |        |
|                                            | 19.95       | 33.78       | .       |        |
| <b>Unsure</b>                              | 83          | 24          | 0       | 107    |
|                                            | 11.08       | 3.20        | 0.00    | 14.29  |
|                                            | 77.57       | 22.43       | 0.00    |        |
|                                            | 22.07       | 6.43        | .       |        |
| <b>Total</b>                               | 376         | 373         | 0       | 749    |
|                                            | 50.20       | 49.80       | 0.00    | 100.00 |
| Frequency Missing = 1                      |             |             |         |        |

| Knowledge Question 2d correct |           |         |                      |                    |
|-------------------------------|-----------|---------|----------------------|--------------------|
| know_q2d_correct              | Frequency | Percent | Cumulative Frequency | Cumulative Percent |
| no                            | 765       | 41.22   | 765                  | 41.22              |
| YES                           | 1091      | 58.78   | 1856                 | 100.00             |
| Frequency Missing = 1         |           |         |                      |                    |

| Table 1 of know_q2d_correct by event            |                                |                                |                                |                |
|-------------------------------------------------|--------------------------------|--------------------------------|--------------------------------|----------------|
| Controlling for group=Control                   |                                |                                |                                |                |
| know_q2d_correct(Knowledge Question 2d correct) | event(Time)                    |                                |                                |                |
| Frequency<br>Percent<br>Row Pct<br>Col Pct      | Pre-survey                     | Post-survey                    | Re-test                        | Total          |
| no                                              | 145<br>13.10<br>31.73<br>39.08 | 154<br>13.91<br>33.70<br>42.19 | 158<br>14.27<br>34.57<br>42.59 | 457<br>41.28   |
| YES                                             | 226<br>20.42<br>34.77<br>60.92 | 211<br>19.06<br>32.46<br>57.81 | 213<br>19.24<br>32.77<br>57.41 | 650<br>58.72   |
| Total                                           | 371<br>33.51                   | 365<br>32.97                   | 371<br>33.51                   | 1107<br>100.00 |

| Table 2 of know_q2d_correct by event            |                                |                                |                        |               |
|-------------------------------------------------|--------------------------------|--------------------------------|------------------------|---------------|
| Controlling for group=Experimental              |                                |                                |                        |               |
| know_q2d_correct(Knowledge Question 2d correct) | event(Time)                    |                                |                        |               |
| Frequency<br>Percent<br>Row Pct<br>Col Pct      | Pre-survey                     | Post-survey                    | Re-test                | Total         |
| no                                              | 158<br>21.09<br>51.30<br>42.02 | 150<br>20.03<br>48.70<br>40.21 | 0<br>0.00<br>0.00<br>. | 308<br>41.12  |
| YES                                             | 218<br>29.11<br>49.43<br>57.98 | 223<br>29.77<br>50.57<br>59.79 | 0<br>0.00<br>0.00<br>. | 441<br>58.88  |
| Total                                           | 376<br>50.20                   | 373<br>49.80                   | 0<br>0.00              | 749<br>100.00 |
| Frequency Missing = 1                           |                                |                                |                        |               |

| Bruising on toddler's ears |           |         |                      |                    |
|----------------------------|-----------|---------|----------------------|--------------------|
| know_q2e                   | Frequency | Percent | Cumulative Frequency | Cumulative Percent |
| no                         | 113       | 6.09    | 113                  | 6.09               |
| YES                        | 1506      | 81.14   | 1619                 | 87.23              |
| Unsure                     | 237       | 12.77   | 1856                 | 100.00             |
| Frequency Missing = 1      |           |         |                      |                    |

| Table 1 of know_q2e by event               |                                |                                |                                |                |
|--------------------------------------------|--------------------------------|--------------------------------|--------------------------------|----------------|
| Controlling for group=Control              |                                |                                |                                |                |
| know_q2e(Bruising on toddler's ears)       | event(Time)                    |                                |                                |                |
| Frequency<br>Percent<br>Row Pct<br>Col Pct | Pre-survey                     | Post-survey                    | Re-test                        | Total          |
| no                                         | 24<br>2.17<br>36.36<br>6.47    | 14<br>1.26<br>21.21<br>3.84    | 28<br>2.53<br>42.42<br>7.55    | 66<br>5.96     |
| YES                                        | 274<br>24.75<br>30.58<br>73.85 | 343<br>30.98<br>38.28<br>93.97 | 279<br>25.20<br>31.14<br>75.20 | 896<br>80.94   |
| Unsure                                     | 73<br>6.59<br>50.34<br>19.68   | 8<br>0.72<br>5.52<br>2.19      | 64<br>5.78<br>44.14<br>17.25   | 145<br>13.10   |
| Total                                      | 371<br>33.51                   | 365<br>32.97                   | 371<br>33.51                   | 1107<br>100.00 |

| Table 2 of know_q2e by event               |                                |                                |                        |               |
|--------------------------------------------|--------------------------------|--------------------------------|------------------------|---------------|
| Controlling for group=Experimental         |                                |                                |                        |               |
| know_q2e(Bruising<br>on toddler's ears)    | event(Time)                    |                                |                        |               |
| Frequency<br>Percent<br>Row Pct<br>Col Pct | Pre-survey                     | Post-survey                    | Re-test                | Total         |
| <b>no</b>                                  | 28<br>3.74<br>59.57<br>7.45    | 19<br>2.54<br>40.43<br>5.09    | 0<br>0.00<br>0.00<br>. | 47<br>6.28    |
| <b>YES</b>                                 | 265<br>35.38<br>43.44<br>70.48 | 345<br>46.06<br>56.56<br>92.49 | 0<br>0.00<br>0.00<br>. | 610<br>81.44  |
| <b>Unsure</b>                              | 83<br>11.08<br>90.22<br>22.07  | 9<br>1.20<br>9.78<br>2.41      | 0<br>0.00<br>0.00<br>. | 92<br>12.28   |
| <b>Total</b>                               | 376<br>50.20                   | 373<br>49.80                   | 0<br>0.00              | 749<br>100.00 |
| Frequency Missing = 1                      |                                |                                |                        |               |

| Knowledge Question 2e correct |           |         |                      |                    |
|-------------------------------|-----------|---------|----------------------|--------------------|
| know_q2e_correct              | Frequency | Percent | Cumulative Frequency | Cumulative Percent |
| no                            | 350       | 18.86   | 350                  | 18.86              |
| YES                           | 1506      | 81.14   | 1856                 | 100.00             |
| Frequency Missing = 1         |           |         |                      |                    |

| Table 1 of know_q2e_correct by event            |                                |                                |                                |                |
|-------------------------------------------------|--------------------------------|--------------------------------|--------------------------------|----------------|
| Controlling for group=Control                   |                                |                                |                                |                |
| know_q2e_correct(Knowledge Question 2e correct) | event(Time)                    |                                |                                |                |
| Frequency<br>Percent<br>Row Pct<br>Col Pct      | Pre-survey                     | Post-survey                    | Re-test                        | Total          |
| no                                              | 97<br>8.76<br>45.97<br>26.15   | 22<br>1.99<br>10.43<br>6.03    | 92<br>8.31<br>43.60<br>24.80   | 211<br>19.06   |
| YES                                             | 274<br>24.75<br>30.58<br>73.85 | 343<br>30.98<br>38.28<br>93.97 | 279<br>25.20<br>31.14<br>75.20 | 896<br>80.94   |
| Total                                           | 371<br>33.51                   | 365<br>32.97                   | 371<br>33.51                   | 1107<br>100.00 |

| Table 2 of know_q2e_correct by event            |                                |                                |                        |               |
|-------------------------------------------------|--------------------------------|--------------------------------|------------------------|---------------|
| Controlling for group=Experimental              |                                |                                |                        |               |
| know_q2e_correct(Knowledge Question 2e correct) | event(Time)                    |                                |                        |               |
| Frequency<br>Percent<br>Row Pct<br>Col Pct      | Pre-survey                     | Post-survey                    | Re-test                | Total         |
| no                                              | 111<br>14.82<br>79.86<br>29.52 | 28<br>3.74<br>20.14<br>7.51    | 0<br>0.00<br>0.00<br>. | 139<br>18.56  |
| YES                                             | 265<br>35.38<br>43.44<br>70.48 | 345<br>46.06<br>56.56<br>92.49 | 0<br>0.00<br>0.00<br>. | 610<br>81.44  |
| Total                                           | 376<br>50.20                   | 373<br>49.80                   | 0<br>0.00              | 749<br>100.00 |
| Frequency Missing = 1                           |                                |                                |                        |               |

| Financial penalty     |           |         |                      |                    |
|-----------------------|-----------|---------|----------------------|--------------------|
| know_q3a              | Frequency | Percent | Cumulative Frequency | Cumulative Percent |
| no                    | 245       | 13.20   | 245                  | 13.20              |
| YES                   | 1146      | 61.75   | 1391                 | 74.95              |
| Unsure                | 465       | 25.05   | 1856                 | 100.00             |
| Frequency Missing = 1 |           |         |                      |                    |

| Table 1 of know_q3a by event               |                                |                                |                                |                |
|--------------------------------------------|--------------------------------|--------------------------------|--------------------------------|----------------|
| Controlling for group=Control              |                                |                                |                                |                |
| know_q3a(Financial penalty)                | event(Time)                    |                                |                                |                |
| Frequency<br>Percent<br>Row Pct<br>Col Pct | Pre-survey                     | Post-survey                    | Re-test                        | Total          |
| no                                         | 49<br>4.43<br>36.57<br>13.21   | 34<br>3.07<br>25.37<br>9.32    | 51<br>4.61<br>38.06<br>13.75   | 134<br>12.10   |
| YES                                        | 165<br>14.91<br>25.27<br>44.47 | 316<br>28.55<br>48.39<br>86.58 | 172<br>15.54<br>26.34<br>46.36 | 653<br>58.99   |
| Unsure                                     | 157<br>14.18<br>49.06<br>42.32 | 15<br>1.36<br>4.69<br>4.11     | 148<br>13.37<br>46.25<br>39.89 | 320<br>28.91   |
| Total                                      | 371<br>33.51                   | 365<br>32.97                   | 371<br>33.51                   | 1107<br>100.00 |

| Table 2 of know_q3a by event               |             |             |         |        |
|--------------------------------------------|-------------|-------------|---------|--------|
| Controlling for group=Experimental         |             |             |         |        |
| know_q3a(Financial<br>penalty)             | event(Time) |             |         |        |
| Frequency<br>Percent<br>Row Pct<br>Col Pct | Pre-survey  | Post-survey | Re-test | Total  |
| <b>no</b>                                  | 64          | 47          | 0       | 111    |
|                                            | 8.54        | 6.28        | 0.00    | 14.82  |
|                                            | 57.66       | 42.34       | 0.00    |        |
|                                            | 17.02       | 12.60       | .       |        |
| <b>YES</b>                                 | 184         | 309         | 0       | 493    |
|                                            | 24.57       | 41.26       | 0.00    | 65.82  |
|                                            | 37.32       | 62.68       | 0.00    |        |
|                                            | 48.94       | 82.84       | .       |        |
| <b>Unsure</b>                              | 128         | 17          | 0       | 145    |
|                                            | 17.09       | 2.27        | 0.00    | 19.36  |
|                                            | 88.28       | 11.72       | 0.00    |        |
|                                            | 34.04       | 4.56        | .       |        |
| <b>Total</b>                               | 376         | 373         | 0       | 749    |
|                                            | 50.20       | 49.80       | 0.00    | 100.00 |
| Frequency Missing = 1                      |             |             |         |        |

| Knowledge Question 3a correct |           |         |                      |                    |
|-------------------------------|-----------|---------|----------------------|--------------------|
| know_q3a_correct              | Frequency | Percent | Cumulative Frequency | Cumulative Percent |
| no                            | 710       | 38.25   | 710                  | 38.25              |
| YES                           | 1146      | 61.75   | 1856                 | 100.00             |
| Frequency Missing = 1         |           |         |                      |                    |

| Table 1 of know_q3a_correct by event            |                                |                                |                                |                |
|-------------------------------------------------|--------------------------------|--------------------------------|--------------------------------|----------------|
| Controlling for group=Control                   |                                |                                |                                |                |
| know_q3a_correct(Knowledge Question 3a correct) | event(Time)                    |                                |                                |                |
| Frequency<br>Percent<br>Row Pct<br>Col Pct      | Pre-survey                     | Post-survey                    | Re-test                        | Total          |
| no                                              | 206<br>18.61<br>45.37<br>55.53 | 49<br>4.43<br>10.79<br>13.42   | 199<br>17.98<br>43.83<br>53.64 | 454<br>41.01   |
| YES                                             | 165<br>14.91<br>25.27<br>44.47 | 316<br>28.55<br>48.39<br>86.58 | 172<br>15.54<br>26.34<br>46.36 | 653<br>58.99   |
| Total                                           | 371<br>33.51                   | 365<br>32.97                   | 371<br>33.51                   | 1107<br>100.00 |

| Table 2 of know_q3a_correct by event            |                                |                                |                        |               |
|-------------------------------------------------|--------------------------------|--------------------------------|------------------------|---------------|
| Controlling for group=Experimental              |                                |                                |                        |               |
| know_q3a_correct(Knowledge Question 3a correct) | event(Time)                    |                                |                        |               |
| Frequency<br>Percent<br>Row Pct<br>Col Pct      | Pre-survey                     | Post-survey                    | Re-test                | Total         |
| no                                              | 192<br>25.63<br>75.00<br>51.06 | 64<br>8.54<br>25.00<br>17.16   | 0<br>0.00<br>0.00<br>. | 256<br>34.18  |
| YES                                             | 184<br>24.57<br>37.32<br>48.94 | 309<br>41.26<br>62.68<br>82.84 | 0<br>0.00<br>0.00<br>. | 493<br>65.82  |
| Total                                           | 376<br>50.20                   | 373<br>49.80                   | 0<br>0.00              | 749<br>100.00 |
| Frequency Missing = 1                           |                                |                                |                        |               |

| Loss of professional license |           |         |                      |                    |
|------------------------------|-----------|---------|----------------------|--------------------|
| know_q3b                     | Frequency | Percent | Cumulative Frequency | Cumulative Percent |
| no                           | 68        | 3.66    | 68                   | 3.66               |
| YES                          | 1596      | 85.99   | 1664                 | 89.66              |
| Unsure                       | 192       | 10.34   | 1856                 | 100.00             |
| Frequency Missing = 1        |           |         |                      |                    |

| Table 1 of know_q3b by event               |                                |                                |                                |                |
|--------------------------------------------|--------------------------------|--------------------------------|--------------------------------|----------------|
| Controlling for group=Control              |                                |                                |                                |                |
| know_q3b(Loss of professional license)     | event(Time)                    |                                |                                |                |
| Frequency<br>Percent<br>Row Pct<br>Col Pct | Pre-survey                     | Post-survey                    | Re-test                        | Total          |
| no                                         | 11<br>0.99<br>27.50<br>2.96    | 14<br>1.26<br>35.00<br>3.84    | 15<br>1.36<br>37.50<br>4.04    | 40<br>3.61     |
| YES                                        | 303<br>27.37<br>31.93<br>81.67 | 343<br>30.98<br>36.14<br>93.97 | 303<br>27.37<br>31.93<br>81.67 | 949<br>85.73   |
| Unsure                                     | 57<br>5.15<br>48.31<br>15.36   | 8<br>0.72<br>6.78<br>2.19      | 53<br>4.79<br>44.92<br>14.29   | 118<br>10.66   |
| Total                                      | 371<br>33.51                   | 365<br>32.97                   | 371<br>33.51                   | 1107<br>100.00 |

| Table 2 of know_q3b by event                 |                                |                                |                        |               |
|----------------------------------------------|--------------------------------|--------------------------------|------------------------|---------------|
| Controlling for group=Experimental           |                                |                                |                        |               |
| know_q3b(Loss<br>of professional<br>license) | event(Time)                    |                                |                        |               |
| Frequency<br>Percent<br>Row Pct<br>Col Pct   | Pre-survey                     | Post-survey                    | Re-test                | Total         |
| <b>no</b>                                    | 8<br>1.07<br>28.57<br>2.13     | 20<br>2.67<br>71.43<br>5.36    | 0<br>0.00<br>0.00<br>. | 28<br>3.74    |
| <b>YES</b>                                   | 303<br>40.45<br>46.83<br>80.59 | 344<br>45.93<br>53.17<br>92.23 | 0<br>0.00<br>0.00<br>. | 647<br>86.38  |
| <b>Unsure</b>                                | 65<br>8.68<br>87.84<br>17.29   | 9<br>1.20<br>12.16<br>2.41     | 0<br>0.00<br>0.00<br>. | 74<br>9.88    |
| <b>Total</b>                                 | 376<br>50.20                   | 373<br>49.80                   | 0<br>0.00              | 749<br>100.00 |
| Frequency Missing = 1                        |                                |                                |                        |               |

| Knowledge Question 3b correct |           |         |                      |                    |
|-------------------------------|-----------|---------|----------------------|--------------------|
| know_q3b_correct              | Frequency | Percent | Cumulative Frequency | Cumulative Percent |
| no                            | 260       | 14.01   | 260                  | 14.01              |
| YES                           | 1596      | 85.99   | 1856                 | 100.00             |
| Frequency Missing = 1         |           |         |                      |                    |

| Table 1 of know_q3b_correct by event            |                                |                                |                                |                |
|-------------------------------------------------|--------------------------------|--------------------------------|--------------------------------|----------------|
| Controlling for group=Control                   |                                |                                |                                |                |
| know_q3b_correct(Knowledge Question 3b correct) | event(Time)                    |                                |                                |                |
| Frequency<br>Percent<br>Row Pct<br>Col Pct      | Pre-survey                     | Post-survey                    | Re-test                        | Total          |
| no                                              | 68<br>6.14<br>43.04<br>18.33   | 22<br>1.99<br>13.92<br>6.03    | 68<br>6.14<br>43.04<br>18.33   | 158<br>14.27   |
| YES                                             | 303<br>27.37<br>31.93<br>81.67 | 343<br>30.98<br>36.14<br>93.97 | 303<br>27.37<br>31.93<br>81.67 | 949<br>85.73   |
| Total                                           | 371<br>33.51                   | 365<br>32.97                   | 371<br>33.51                   | 1107<br>100.00 |

| Table 2 of know_q3b_correct by event            |                                |                                |                        |               |
|-------------------------------------------------|--------------------------------|--------------------------------|------------------------|---------------|
| Controlling for group=Experimental              |                                |                                |                        |               |
| know_q3b_correct(Knowledge Question 3b correct) | event(Time)                    |                                |                        |               |
| Frequency<br>Percent<br>Row Pct<br>Col Pct      | Pre-survey                     | Post-survey                    | Re-test                | Total         |
| no                                              | 73<br>9.75<br>71.57<br>19.41   | 29<br>3.87<br>28.43<br>7.77    | 0<br>0.00<br>0.00<br>. | 102<br>13.62  |
| YES                                             | 303<br>40.45<br>46.83<br>80.59 | 344<br>45.93<br>53.17<br>92.23 | 0<br>0.00<br>0.00<br>. | 647<br>86.38  |
| Total                                           | 376<br>50.20                   | 373<br>49.80                   | 0<br>0.00              | 749<br>100.00 |
| Frequency Missing = 1                           |                                |                                |                        |               |

| Incarceration         |           |         |                      |                    |
|-----------------------|-----------|---------|----------------------|--------------------|
| know_q3c              | Frequency | Percent | Cumulative Frequency | Cumulative Percent |
| no                    | 269       | 14.49   | 269                  | 14.49              |
| YES                   | 1153      | 62.12   | 1422                 | 76.62              |
| Unsure                | 434       | 23.38   | 1856                 | 100.00             |
| Frequency Missing = 1 |           |         |                      |                    |

| Table 1 of know_q3c by event               |                                |                                |                                |                |
|--------------------------------------------|--------------------------------|--------------------------------|--------------------------------|----------------|
| Controlling for group=Control              |                                |                                |                                |                |
| know_q3c(Incarceration)                    | event(Time)                    |                                |                                |                |
| Frequency<br>Percent<br>Row Pct<br>Col Pct | Pre-survey                     | Post-survey                    | Re-test                        | Total          |
| no                                         | 62<br>5.60<br>38.75<br>16.71   | 34<br>3.07<br>21.25<br>9.32    | 64<br>5.78<br>40.00<br>17.25   | 160<br>14.45   |
| YES                                        | 177<br>15.99<br>26.58<br>47.71 | 307<br>27.73<br>46.10<br>84.11 | 182<br>16.44<br>27.33<br>49.06 | 666<br>60.16   |
| Unsure                                     | 132<br>11.92<br>46.98<br>35.58 | 24<br>2.17<br>8.54<br>6.58     | 125<br>11.29<br>44.48<br>33.69 | 281<br>25.38   |
| Total                                      | 371<br>33.51                   | 365<br>32.97                   | 371<br>33.51                   | 1107<br>100.00 |

| Table 2 of know_q3c by event               |             |             |         |        |
|--------------------------------------------|-------------|-------------|---------|--------|
| Controlling for group=Experimental         |             |             |         |        |
| know_q3c(Incarceration)                    | event(Time) |             |         |        |
| Frequency<br>Percent<br>Row Pct<br>Col Pct | Pre-survey  | Post-survey | Re-test | Total  |
| <b>no</b>                                  | 69          | 40          | 0       | 109    |
|                                            | 9.21        | 5.34        | 0.00    | 14.55  |
|                                            | 63.30       | 36.70       | 0.00    |        |
|                                            | 18.35       | 10.72       | .       |        |
| <b>YES</b>                                 | 170         | 317         | 0       | 487    |
|                                            | 22.70       | 42.32       | 0.00    | 65.02  |
|                                            | 34.91       | 65.09       | 0.00    |        |
|                                            | 45.21       | 84.99       | .       |        |
| <b>Unsure</b>                              | 137         | 16          | 0       | 153    |
|                                            | 18.29       | 2.14        | 0.00    | 20.43  |
|                                            | 89.54       | 10.46       | 0.00    |        |
|                                            | 36.44       | 4.29        | .       |        |
| <b>Total</b>                               | 376         | 373         | 0       | 749    |
|                                            | 50.20       | 49.80       | 0.00    | 100.00 |
| Frequency Missing = 1                      |             |             |         |        |

| Knowledge Question 3c correct |           |         |                      |                    |
|-------------------------------|-----------|---------|----------------------|--------------------|
| know_q3c_correct              | Frequency | Percent | Cumulative Frequency | Cumulative Percent |
| no                            | 703       | 37.88   | 703                  | 37.88              |
| YES                           | 1153      | 62.12   | 1856                 | 100.00             |
| Frequency Missing = 1         |           |         |                      |                    |

| Table 1 of know_q3c_correct by event            |                                |                                |                                |                |
|-------------------------------------------------|--------------------------------|--------------------------------|--------------------------------|----------------|
| Controlling for group=Control                   |                                |                                |                                |                |
| know_q3c_correct(Knowledge Question 3c correct) | event(Time)                    |                                |                                |                |
| Frequency<br>Percent<br>Row Pct<br>Col Pct      | Pre-survey                     | Post-survey                    | Re-test                        | Total          |
| no                                              | 194<br>17.52<br>43.99<br>52.29 | 58<br>5.24<br>13.15<br>15.89   | 189<br>17.07<br>42.86<br>50.94 | 441<br>39.84   |
| YES                                             | 177<br>15.99<br>26.58<br>47.71 | 307<br>27.73<br>46.10<br>84.11 | 182<br>16.44<br>27.33<br>49.06 | 666<br>60.16   |
| Total                                           | 371<br>33.51                   | 365<br>32.97                   | 371<br>33.51                   | 1107<br>100.00 |

| Table 2 of know_q3c_correct by event            |                                |                                |                        |               |
|-------------------------------------------------|--------------------------------|--------------------------------|------------------------|---------------|
| Controlling for group=Experimental              |                                |                                |                        |               |
| know_q3c_correct(Knowledge Question 3c correct) | event(Time)                    |                                |                        |               |
| Frequency<br>Percent<br>Row Pct<br>Col Pct      | Pre-survey                     | Post-survey                    | Re-test                | Total         |
| no                                              | 206<br>27.50<br>78.63<br>54.79 | 56<br>7.48<br>21.37<br>15.01   | 0<br>0.00<br>0.00<br>. | 262<br>34.98  |
| YES                                             | 170<br>22.70<br>34.91<br>45.21 | 317<br>42.32<br>65.09<br>84.99 | 0<br>0.00<br>0.00<br>. | 487<br>65.02  |
| Total                                           | 376<br>50.20                   | 373<br>49.80                   | 0<br>0.00              | 749<br>100.00 |
| Frequency Missing = 1                           |                                |                                |                        |               |

| Under recently enacted Pennsylvania law, for an act (or failure to act) to count as abuse/neglect, which of the following must be true? |           |         |                      |                    |
|-----------------------------------------------------------------------------------------------------------------------------------------|-----------|---------|----------------------|--------------------|
| know_q4                                                                                                                                 | Frequency | Percent | Cumulative Frequency | Cumulative Percent |
| Any of the above                                                                                                                        | 756       | 40.73   | 756                  | 40.73              |
| All of the above                                                                                                                        | 1073      | 57.81   | 1829                 | 98.55              |
| None of the above                                                                                                                       | 27        | 1.45    | 1856                 | 100.00             |
| Frequency Missing = 1                                                                                                                   |           |         |                      |                    |

| Table 1 of know_q4 by event                                                                                                                      |                                |                                |                                |                |
|--------------------------------------------------------------------------------------------------------------------------------------------------|--------------------------------|--------------------------------|--------------------------------|----------------|
| Controlling for group=Control                                                                                                                    |                                |                                |                                |                |
| know_q4(Under recently enacted Pennsylvania law, for an act (or failure to act) to count as abuse/neglect, which of the following must be true?) | event(Time)                    |                                |                                |                |
| Frequency<br>Percent<br>Row Pct<br>Col Pct                                                                                                       | Pre-survey                     | Post-survey                    | Re-test                        | Total          |
| Any of the above                                                                                                                                 | 148<br>13.37<br>31.62<br>39.89 | 167<br>15.09<br>35.68<br>45.75 | 153<br>13.82<br>32.69<br>41.24 | 468<br>42.28   |
| All of the above                                                                                                                                 | 216<br>19.51<br>34.67<br>58.22 | 195<br>17.62<br>31.30<br>53.42 | 212<br>19.15<br>34.03<br>57.14 | 623<br>56.28   |
| None of the above                                                                                                                                | 7<br>0.63<br>43.75<br>1.89     | 3<br>0.27<br>18.75<br>0.82     | 6<br>0.54<br>37.50<br>1.62     | 16<br>1.45     |
| Total                                                                                                                                            | 371<br>33.51                   | 365<br>32.97                   | 371<br>33.51                   | 1107<br>100.00 |

| Table 2 of know_q4 by event                                                                                                                      |                                |                                |                        |               |
|--------------------------------------------------------------------------------------------------------------------------------------------------|--------------------------------|--------------------------------|------------------------|---------------|
| Controlling for group=Experimental                                                                                                               |                                |                                |                        |               |
| know_q4(Under recently enacted Pennsylvania law, for an act (or failure to act) to count as abuse/neglect, which of the following must be true?) | event(Time)                    |                                |                        |               |
| Frequency<br>Percent<br>Row Pct<br>Col Pct                                                                                                       | Pre-survey                     | Post-survey                    | Re-test                | Total         |
| Any of the above                                                                                                                                 | 135<br>18.02<br>46.88<br>35.90 | 153<br>20.43<br>53.13<br>41.02 | 0<br>0.00<br>0.00<br>. | 288<br>38.45  |
| All of the above                                                                                                                                 | 235<br>31.38<br>52.22<br>62.50 | 215<br>28.70<br>47.78<br>57.64 | 0<br>0.00<br>0.00<br>. | 450<br>60.08  |
| None of the above                                                                                                                                | 6<br>0.80<br>54.55<br>1.60     | 5<br>0.67<br>45.45<br>1.34     | 0<br>0.00<br>0.00<br>. | 11<br>1.47    |
| Total                                                                                                                                            | 376<br>50.20                   | 373<br>49.80                   | 0<br>0.00              | 749<br>100.00 |
| Frequency Missing = 1                                                                                                                            |                                |                                |                        |               |

| Knowledge Question 4 correct |           |         |                      |                    |
|------------------------------|-----------|---------|----------------------|--------------------|
| know_q4_correct              | Frequency | Percent | Cumulative Frequency | Cumulative Percent |
| no                           | 1100      | 59.27   | 1100                 | 59.27              |
| YES                          | 756       | 40.73   | 1856                 | 100.00             |
| Frequency Missing = 1        |           |         |                      |                    |

| Table 1 of know_q4_correct by event           |                                |                                |                                |                |
|-----------------------------------------------|--------------------------------|--------------------------------|--------------------------------|----------------|
| Controlling for group=Control                 |                                |                                |                                |                |
| know_q4_correct(Knowledge Question 4 correct) | event(Time)                    |                                |                                |                |
| Frequency<br>Percent<br>Row Pct<br>Col Pct    | Pre-survey                     | Post-survey                    | Re-test                        | Total          |
| no                                            | 223<br>20.14<br>34.90<br>60.11 | 198<br>17.89<br>30.99<br>54.25 | 218<br>19.69<br>34.12<br>58.76 | 639<br>57.72   |
| YES                                           | 148<br>13.37<br>31.62<br>39.89 | 167<br>15.09<br>35.68<br>45.75 | 153<br>13.82<br>32.69<br>41.24 | 468<br>42.28   |
| Total                                         | 371<br>33.51                   | 365<br>32.97                   | 371<br>33.51                   | 1107<br>100.00 |

| Table 2 of know_q4_correct by event           |                                |                                |                        |               |
|-----------------------------------------------|--------------------------------|--------------------------------|------------------------|---------------|
| Controlling for group=Experimental            |                                |                                |                        |               |
| know_q4_correct(Knowledge Question 4 correct) | event(Time)                    |                                |                        |               |
| Frequency<br>Percent<br>Row Pct<br>Col Pct    | Pre-survey                     | Post-survey                    | Re-test                | Total         |
| no                                            | 241<br>32.18<br>52.28<br>64.10 | 220<br>29.37<br>47.72<br>58.98 | 0<br>0.00<br>0.00<br>. | 461<br>61.55  |
| YES                                           | 135<br>18.02<br>46.88<br>35.90 | 153<br>20.43<br>53.13<br>41.02 | 0<br>0.00<br>0.00<br>. | 288<br>38.45  |
| Total                                         | 376<br>50.20                   | 373<br>49.80                   | 0<br>0.00              | 749<br>100.00 |
| Frequency Missing = 1                         |                                |                                |                        |               |

| Under Pennsylvania law, you can be held legally liable if you suspect child abuse/neglect and report it, but it turns out to be unfounded. |           |         |                      |                    |
|--------------------------------------------------------------------------------------------------------------------------------------------|-----------|---------|----------------------|--------------------|
| know_q5                                                                                                                                    | Frequency | Percent | Cumulative Frequency | Cumulative Percent |
| True                                                                                                                                       | 205       | 11.05   | 205                  | 11.05              |
| False                                                                                                                                      | 1319      | 71.07   | 1524                 | 82.11              |
| I am unsure                                                                                                                                | 332       | 17.89   | 1856                 | 100.00             |
| Frequency Missing = 1                                                                                                                      |           |         |                      |                    |

| Table 1 of know_q5 by event                                                                                                                         |                                |                                |                                |                |
|-----------------------------------------------------------------------------------------------------------------------------------------------------|--------------------------------|--------------------------------|--------------------------------|----------------|
| Controlling for group=Control                                                                                                                       |                                |                                |                                |                |
| know_q5(Under Pennsylvania law, you can be held legally liable if you suspect child abuse/neglect and report it, but it turns out to be unfounded.) | event(Time)                    |                                |                                |                |
| Frequency<br>Percent<br>Row Pct<br>Col Pct                                                                                                          | Pre-survey                     | Post-survey                    | Re-test                        | Total          |
| True                                                                                                                                                | 28<br>2.53<br>21.71<br>7.55    | 59<br>5.33<br>45.74<br>16.16   | 42<br>3.79<br>32.56<br>11.32   | 129<br>11.65   |
| False                                                                                                                                               | 236<br>21.32<br>30.93<br>63.61 | 294<br>26.56<br>38.53<br>80.55 | 233<br>21.05<br>30.54<br>62.80 | 763<br>68.93   |
| I am unsure                                                                                                                                         | 107<br>9.67<br>49.77<br>28.84  | 12<br>1.08<br>5.58<br>3.29     | 96<br>8.67<br>44.65<br>25.88   | 215<br>19.42   |
| Total                                                                                                                                               | 371<br>33.51                   | 365<br>32.97                   | 371<br>33.51                   | 1107<br>100.00 |

| Table 2 of know_q5 by event                                                                                                                                                       |                                |                                |                        |               |
|-----------------------------------------------------------------------------------------------------------------------------------------------------------------------------------|--------------------------------|--------------------------------|------------------------|---------------|
| Controlling for group=Experimental                                                                                                                                                |                                |                                |                        |               |
| know_q5(Under<br>Pennsylvania<br>law, you can be<br>held legally<br>liable if you<br>suspect child<br>abuse/neglect<br>and report it,<br>but it turns out<br>to be<br>unfounded.) | event(Time)                    |                                |                        |               |
| Frequency<br>Percent<br>Row Pct<br>Col Pct                                                                                                                                        | Pre-survey                     | Post-survey                    | Re-test                | Total         |
| <b>True</b>                                                                                                                                                                       | 28<br>3.74<br>36.84<br>7.45    | 48<br>6.41<br>63.16<br>12.87   | 0<br>0.00<br>0.00<br>. | 76<br>10.15   |
| <b>False</b>                                                                                                                                                                      | 242<br>32.31<br>43.53<br>64.36 | 314<br>41.92<br>56.47<br>84.18 | 0<br>0.00<br>0.00<br>. | 556<br>74.23  |
| <b>I am unsure</b>                                                                                                                                                                | 106<br>14.15<br>90.60<br>28.19 | 11<br>1.47<br>9.40<br>2.95     | 0<br>0.00<br>0.00<br>. | 117<br>15.62  |
| <b>Total</b>                                                                                                                                                                      | 376<br>50.20                   | 373<br>49.80                   | 0<br>0.00              | 749<br>100.00 |
| Frequency Missing = 1                                                                                                                                                             |                                |                                |                        |               |

| Knowledge Question 5 correct |           |         |                      |                    |
|------------------------------|-----------|---------|----------------------|--------------------|
| know_q5_correct              | Frequency | Percent | Cumulative Frequency | Cumulative Percent |
| no                           | 537       | 28.93   | 537                  | 28.93              |
| YES                          | 1319      | 71.07   | 1856                 | 100.00             |
| Frequency Missing = 1        |           |         |                      |                    |

| Table 1 of know_q5_correct by event           |                                |                                |                                |                |
|-----------------------------------------------|--------------------------------|--------------------------------|--------------------------------|----------------|
| Controlling for group=Control                 |                                |                                |                                |                |
| know_q5_correct(Knowledge Question 5 correct) | event(Time)                    |                                |                                |                |
| Frequency<br>Percent<br>Row Pct<br>Col Pct    | Pre-survey                     | Post-survey                    | Re-test                        | Total          |
| no                                            | 135<br>12.20<br>39.24<br>36.39 | 71<br>6.41<br>20.64<br>19.45   | 138<br>12.47<br>40.12<br>37.20 | 344<br>31.07   |
| YES                                           | 236<br>21.32<br>30.93<br>63.61 | 294<br>26.56<br>38.53<br>80.55 | 233<br>21.05<br>30.54<br>62.80 | 763<br>68.93   |
| Total                                         | 371<br>33.51                   | 365<br>32.97                   | 371<br>33.51                   | 1107<br>100.00 |

| Table 2 of know_q5_correct by event           |                                |                                |                        |               |
|-----------------------------------------------|--------------------------------|--------------------------------|------------------------|---------------|
| Controlling for group=Experimental            |                                |                                |                        |               |
| know_q5_correct(Knowledge Question 5 correct) | event(Time)                    |                                |                        |               |
| Frequency<br>Percent<br>Row Pct<br>Col Pct    | Pre-survey                     | Post-survey                    | Re-test                | Total         |
| no                                            | 134<br>17.89<br>69.43<br>35.64 | 59<br>7.88<br>30.57<br>15.82   | 0<br>0.00<br>0.00<br>. | 193<br>25.77  |
| YES                                           | 242<br>32.31<br>43.53<br>64.36 | 314<br>41.92<br>56.47<br>84.18 | 0<br>0.00<br>0.00<br>. | 556<br>74.23  |
| Total                                         | 376<br>50.20                   | 373<br>49.80                   | 0<br>0.00              | 749<br>100.00 |
| Frequency Missing = 1                         |                                |                                |                        |               |

| Under Pennsylvania law, once you have reasonable cause to suspect child abuse/neglect, you must report your suspicion to authorities: |           |         |                      |                    |
|---------------------------------------------------------------------------------------------------------------------------------------|-----------|---------|----------------------|--------------------|
| know_q6                                                                                                                               | Frequency | Percent | Cumulative Frequency | Cumulative Percent |
| Within a day                                                                                                                          | 269       | 14.49   | 269                  | 14.49              |
| Within 48 hours                                                                                                                       | 248       | 13.36   | 517                  | 27.86              |
| Within 72 hours                                                                                                                       | 34        | 1.83    | 551                  | 29.69              |
| Immediately                                                                                                                           | 1093      | 58.89   | 1644                 | 88.58              |
| Within a week                                                                                                                         | 9         | 0.48    | 1653                 | 89.06              |
| I am unsure                                                                                                                           | 203       | 10.94   | 1856                 | 100.00             |
| Frequency Missing = 1                                                                                                                 |           |         |                      |                    |

| Table 1 of know_q6 by event                                                                                                                    |                                |                                |                                |                |
|------------------------------------------------------------------------------------------------------------------------------------------------|--------------------------------|--------------------------------|--------------------------------|----------------|
| Controlling for group=Control                                                                                                                  |                                |                                |                                |                |
| know_q6(Under Pennsylvania law, once you have reasonable cause to suspect child abuse/neglect, you must report your suspicion to authorities:) | event(Time)                    |                                |                                |                |
| Frequency<br>Percent<br>Row Pct<br>Col Pct                                                                                                     | Pre-survey                     | Post-survey                    | Re-test                        | Total          |
| Within a day                                                                                                                                   | 53<br>4.79<br>31.93<br>14.29   | 49<br>4.43<br>29.52<br>13.42   | 64<br>5.78<br>38.55<br>17.25   | 166<br>15.00   |
| Within 48 hours                                                                                                                                | 64<br>5.78<br>42.38<br>17.25   | 26<br>2.35<br>17.22<br>7.12    | 61<br>5.51<br>40.40<br>16.44   | 151<br>13.64   |
| Within 72 hours                                                                                                                                | 5<br>0.45<br>29.41<br>1.35     | 5<br>0.45<br>29.41<br>1.37     | 7<br>0.63<br>41.18<br>1.89     | 17<br>1.54     |
| Immediately                                                                                                                                    | 196<br>17.71<br>31.41<br>52.83 | 273<br>24.66<br>43.75<br>74.79 | 155<br>14.00<br>24.84<br>41.78 | 624<br>56.37   |
| Within a week                                                                                                                                  | 0<br>0.00<br>0.00<br>0.00      | 4<br>0.36<br>80.00<br>1.10     | 1<br>0.09<br>20.00<br>0.27     | 5<br>0.45      |
| I am unsure                                                                                                                                    | 53<br>4.79<br>36.81<br>14.29   | 8<br>0.72<br>5.56<br>2.19      | 83<br>7.50<br>57.64<br>22.37   | 144<br>13.01   |
| Total                                                                                                                                          | 371<br>33.51                   | 365<br>32.97                   | 371<br>33.51                   | 1107<br>100.00 |

| Table 2 of know_q6 by event                                                                                                                                               |                                |                                |                        |               |
|---------------------------------------------------------------------------------------------------------------------------------------------------------------------------|--------------------------------|--------------------------------|------------------------|---------------|
| Controlling for group=Experimental                                                                                                                                        |                                |                                |                        |               |
| know_q6(Under<br>Pennsylvania<br>law, once you<br>have reasonable<br>cause to suspect<br>child<br>abuse/neglect,<br>you must report<br>your suspicion<br>to authorities:) | event(Time)                    |                                |                        |               |
| Frequency<br>Percent<br>Row Pct<br>Col Pct                                                                                                                                | Pre-survey                     | Post-survey                    | Re-test                | Total         |
| <b>Within a day</b>                                                                                                                                                       | 48<br>6.41<br>46.60<br>12.77   | 55<br>7.34<br>53.40<br>14.75   | 0<br>0.00<br>0.00<br>. | 103<br>13.75  |
| <b>Within 48 hours</b>                                                                                                                                                    | 57<br>7.61<br>58.76<br>15.16   | 40<br>5.34<br>41.24<br>10.72   | 0<br>0.00<br>0.00<br>. | 97<br>12.95   |
| <b>Within 72 hours</b>                                                                                                                                                    | 14<br>1.87<br>82.35<br>3.72    | 3<br>0.40<br>17.65<br>0.80     | 0<br>0.00<br>0.00<br>. | 17<br>2.27    |
| <b>Immediately</b>                                                                                                                                                        | 205<br>27.37<br>43.71<br>54.52 | 264<br>35.25<br>56.29<br>70.78 | 0<br>0.00<br>0.00<br>. | 469<br>62.62  |
| <b>Within a week</b>                                                                                                                                                      | 2<br>0.27<br>50.00<br>0.53     | 2<br>0.27<br>50.00<br>0.54     | 0<br>0.00<br>0.00<br>. | 4<br>0.53     |
| <b>I am unsure</b>                                                                                                                                                        | 50<br>6.68<br>84.75<br>13.30   | 9<br>1.20<br>15.25<br>2.41     | 0<br>0.00<br>0.00<br>. | 59<br>7.88    |
| <b>Total</b>                                                                                                                                                              | 376<br>50.20                   | 373<br>49.80                   | 0<br>0.00              | 749<br>100.00 |
| Frequency Missing = 1                                                                                                                                                     |                                |                                |                        |               |

| Knowledge Question 6 correct |           |         |                      |                    |
|------------------------------|-----------|---------|----------------------|--------------------|
| know_q6_correct              | Frequency | Percent | Cumulative Frequency | Cumulative Percent |
| no                           | 763       | 41.11   | 763                  | 41.11              |
| YES                          | 1093      | 58.89   | 1856                 | 100.00             |
| Frequency Missing = 1        |           |         |                      |                    |

| Table 1 of know_q6_correct by event           |                                |                                |                                |                |
|-----------------------------------------------|--------------------------------|--------------------------------|--------------------------------|----------------|
| Controlling for group=Control                 |                                |                                |                                |                |
| know_q6_correct(Knowledge Question 6 correct) | event(Time)                    |                                |                                |                |
| Frequency<br>Percent<br>Row Pct<br>Col Pct    | Pre-survey                     | Post-survey                    | Re-test                        | Total          |
| no                                            | 175<br>15.81<br>36.23<br>47.17 | 92<br>8.31<br>19.05<br>25.21   | 216<br>19.51<br>44.72<br>58.22 | 483<br>43.63   |
| YES                                           | 196<br>17.71<br>31.41<br>52.83 | 273<br>24.66<br>43.75<br>74.79 | 155<br>14.00<br>24.84<br>41.78 | 624<br>56.37   |
| Total                                         | 371<br>33.51                   | 365<br>32.97                   | 371<br>33.51                   | 1107<br>100.00 |

| Table 2 of know_q6_correct by event           |                                |                                |                        |               |
|-----------------------------------------------|--------------------------------|--------------------------------|------------------------|---------------|
| Controlling for group=Experimental            |                                |                                |                        |               |
| know_q6_correct(Knowledge Question 6 correct) | event(Time)                    |                                |                        |               |
| Frequency<br>Percent<br>Row Pct<br>Col Pct    | Pre-survey                     | Post-survey                    | Re-test                | Total         |
| no                                            | 171<br>22.83<br>61.07<br>45.48 | 109<br>14.55<br>38.93<br>29.22 | 0<br>0.00<br>0.00<br>. | 280<br>37.38  |
| YES                                           | 205<br>27.37<br>43.71<br>54.52 | 264<br>35.25<br>56.29<br>70.78 | 0<br>0.00<br>0.00<br>. | 469<br>62.62  |
| Total                                         | 376<br>50.20                   | 373<br>49.80                   | 0<br>0.00              | 749<br>100.00 |
| Frequency Missing = 1                         |                                |                                |                        |               |

| Under Pennsylvania law, you must report:                                           |           |         |                      |                    |
|------------------------------------------------------------------------------------|-----------|---------|----------------------|--------------------|
| know_q7                                                                            | Frequency | Percent | Cumulative Frequency | Cumulative Percent |
| Whenever I think it is possible that a child has been abused/neglected             | 247       | 13.31   | 247                  | 13.31              |
| Only when I am certain that a child has been abused/neglected                      | 76        | 4.09    | 323                  | 17.40              |
| Whenever I have reasonable cause to suspect that a child has been abused/neglected | 1472      | 79.31   | 1795                 | 96.71              |
| Only if I think it is more likely than not that a child has been abused/neglected  | 18        | 0.97    | 1813                 | 97.68              |
| I am unsure                                                                        | 43        | 2.32    | 1856                 | 100.00             |
| Frequency Missing = 1                                                              |           |         |                      |                    |

| Table 1 of know_q7 by event                                                        |                                |                                |                                |                |
|------------------------------------------------------------------------------------|--------------------------------|--------------------------------|--------------------------------|----------------|
| Controlling for group=Control                                                      |                                |                                |                                |                |
| know_q7(Under Pennsylvania law, you must report:)                                  | event(Time)                    |                                |                                |                |
| Frequency<br>Percent<br>Row Pct<br>Col Pct                                         | Pre-survey                     | Post-survey                    | Re-test                        | Total          |
| Whenever I think it is possible that a child has been abused/neglected             | 55<br>4.97<br>37.67<br>14.82   | 27<br>2.44<br>18.49<br>7.40    | 64<br>5.78<br>43.84<br>17.25   | 146<br>13.19   |
| Only when I am certain that a child has been abused/neglected                      | 21<br>1.90<br>42.00<br>5.66    | 8<br>0.72<br>16.00<br>2.19     | 21<br>1.90<br>42.00<br>5.66    | 50<br>4.52     |
| Whenever I have reasonable cause to suspect that a child has been abused/neglected | 273<br>24.66<br>31.24<br>73.58 | 327<br>29.54<br>37.41<br>89.59 | 274<br>24.75<br>31.35<br>73.85 | 874<br>78.95   |
| Only if I think it is more likely than not that a child has been abused/neglected  | 2<br>0.18<br>33.33<br>0.54     | 2<br>0.18<br>33.33<br>0.55     | 2<br>0.18<br>33.33<br>0.54     | 6<br>0.54      |
| I am unsure                                                                        | 20<br>1.81<br>64.52<br>5.39    | 1<br>0.09<br>3.23<br>0.27      | 10<br>0.90<br>32.26<br>2.70    | 31<br>2.80     |
| Total                                                                              | 371<br>33.51                   | 365<br>32.97                   | 371<br>33.51                   | 1107<br>100.00 |

| Table 2 of know_q7 by event                                                        |                                |                                |                        |               |
|------------------------------------------------------------------------------------|--------------------------------|--------------------------------|------------------------|---------------|
| Controlling for group=Experimental                                                 |                                |                                |                        |               |
| know_q7(Under Pennsylvania law, you must report:)                                  | event(Time)                    |                                |                        |               |
| Frequency<br>Percent<br>Row Pct<br>Col Pct                                         | Pre-survey                     | Post-survey                    | Re-test                | Total         |
| Whenever I think it is possible that a child has been abused/neglected             | 57<br>7.61<br>56.44<br>15.16   | 44<br>5.87<br>43.56<br>11.80   | 0<br>0.00<br>0.00<br>. | 101<br>13.48  |
| Only when I am certain that a child has been abused/neglected                      | 18<br>2.40<br>69.23<br>4.79    | 8<br>1.07<br>30.77<br>2.14     | 0<br>0.00<br>0.00<br>. | 26<br>3.47    |
| Whenever I have reasonable cause to suspect that a child has been abused/neglected | 283<br>37.78<br>47.32<br>75.27 | 315<br>42.06<br>52.68<br>84.45 | 0<br>0.00<br>0.00<br>. | 598<br>79.84  |
| Only if I think it is more likely than not that a child has been abused/neglected  | 6<br>0.80<br>50.00<br>1.60     | 6<br>0.80<br>50.00<br>1.61     | 0<br>0.00<br>0.00<br>. | 12<br>1.60    |
| I am unsure                                                                        | 12<br>1.60<br>100.00<br>3.19   | 0<br>0.00<br>0.00<br>0.00      | 0<br>0.00<br>0.00<br>. | 12<br>1.60    |
| Total                                                                              | 376<br>50.20                   | 373<br>49.80                   | 0<br>0.00              | 749<br>100.00 |
| Frequency Missing = 1                                                              |                                |                                |                        |               |

| Knowledge Question 7 correct |           |         |                      |                    |
|------------------------------|-----------|---------|----------------------|--------------------|
| know_q7_correct              | Frequency | Percent | Cumulative Frequency | Cumulative Percent |
| no                           | 384       | 20.69   | 384                  | 20.69              |
| YES                          | 1472      | 79.31   | 1856                 | 100.00             |
| Frequency Missing = 1        |           |         |                      |                    |

| Table 1 of know_q7_correct by event           |                                |                                |                                |                |
|-----------------------------------------------|--------------------------------|--------------------------------|--------------------------------|----------------|
| Controlling for group=Control                 |                                |                                |                                |                |
| know_q7_correct(Knowledge Question 7 correct) | event(Time)                    |                                |                                |                |
| Frequency<br>Percent<br>Row Pct<br>Col Pct    | Pre-survey                     | Post-survey                    | Re-test                        | Total          |
| no                                            | 98<br>8.85<br>42.06<br>26.42   | 38<br>3.43<br>16.31<br>10.41   | 97<br>8.76<br>41.63<br>26.15   | 233<br>21.05   |
| YES                                           | 273<br>24.66<br>31.24<br>73.58 | 327<br>29.54<br>37.41<br>89.59 | 274<br>24.75<br>31.35<br>73.85 | 874<br>78.95   |
| Total                                         | 371<br>33.51                   | 365<br>32.97                   | 371<br>33.51                   | 1107<br>100.00 |

| Table 2 of know_q7_correct by event           |                                |                                |                        |               |
|-----------------------------------------------|--------------------------------|--------------------------------|------------------------|---------------|
| Controlling for group=Experimental            |                                |                                |                        |               |
| know_q7_correct(Knowledge Question 7 correct) | event(Time)                    |                                |                        |               |
| Frequency<br>Percent<br>Row Pct<br>Col Pct    | Pre-survey                     | Post-survey                    | Re-test                | Total         |
| no                                            | 93<br>12.42<br>61.59<br>24.73  | 58<br>7.74<br>38.41<br>15.55   | 0<br>0.00<br>0.00<br>. | 151<br>20.16  |
| YES                                           | 283<br>37.78<br>47.32<br>75.27 | 315<br>42.06<br>52.68<br>84.45 | 0<br>0.00<br>0.00<br>. | 598<br>79.84  |
| Total                                         | 376<br>50.20                   | 373<br>49.80                   | 0<br>0.00              | 749<br>100.00 |
| Frequency Missing = 1                         |                                |                                |                        |               |

| According to newly enacted Pennsylvania law, you are required to report suspected child abuse/neglect to: |           |         |                      |                    |
|-----------------------------------------------------------------------------------------------------------|-----------|---------|----------------------|--------------------|
| know_q8                                                                                                   | Frequency | Percent | Cumulative Frequency | Cumulative Percent |
| The police                                                                                                | 108       | 5.82    | 108                  | 5.82               |
| ChildLine only                                                                                            | 576       | 31.03   | 684                  | 36.85              |
| My supervisor only                                                                                        | 55        | 2.96    | 739                  | 39.82              |
| Both ChildLine and my supervisor                                                                          | 981       | 52.86   | 1720                 | 92.67              |
| I am unsure                                                                                               | 136       | 7.33    | 1856                 | 100.00             |
| Frequency Missing = 1                                                                                     |           |         |                      |                    |

| Table 1 of know_q8 by event                                                                                        |                                |                                |                                |                |
|--------------------------------------------------------------------------------------------------------------------|--------------------------------|--------------------------------|--------------------------------|----------------|
| Controlling for group=Control                                                                                      |                                |                                |                                |                |
| know_q8(According to newly enacted Pennsylvania law, you are required to report suspected child abuse/neglect to:) | event(Time)                    |                                |                                |                |
| Frequency<br>Percent<br>Row Pct<br>Col Pct                                                                         | Pre-survey                     | Post-survey                    | Re-test                        | Total          |
| The police                                                                                                         | 29<br>2.62<br>40.28<br>7.82    | 13<br>1.17<br>18.06<br>3.56    | 30<br>2.71<br>41.67<br>8.09    | 72<br>6.50     |
| ChildLine only                                                                                                     | 115<br>10.39<br>31.51<br>31.00 | 135<br>12.20<br>36.99<br>36.99 | 115<br>10.39<br>31.51<br>31.00 | 365<br>32.97   |
| My supervisor only                                                                                                 | 15<br>1.36<br>45.45<br>4.04    | 5<br>0.45<br>15.15<br>1.37     | 13<br>1.17<br>39.39<br>3.50    | 33<br>2.98     |
| Both ChildLine and my supervisor                                                                                   | 169<br>15.27<br>30.90<br>45.55 | 207<br>18.70<br>37.84<br>56.71 | 171<br>15.45<br>31.26<br>46.09 | 547<br>49.41   |
| I am unsure                                                                                                        | 43<br>3.88<br>47.78<br>11.59   | 5<br>0.45<br>5.56<br>1.37      | 42<br>3.79<br>46.67<br>11.32   | 90<br>8.13     |
| Total                                                                                                              | 371<br>33.51                   | 365<br>32.97                   | 371<br>33.51                   | 1107<br>100.00 |

| Table 2 of know_q8 by event                                                                                        |                                |                                |                        |               |
|--------------------------------------------------------------------------------------------------------------------|--------------------------------|--------------------------------|------------------------|---------------|
| Controlling for group=Experimental                                                                                 |                                |                                |                        |               |
| know_q8(According to newly enacted Pennsylvania law, you are required to report suspected child abuse/neglect to:) | event(Time)                    |                                |                        |               |
| Frequency<br>Percent<br>Row Pct<br>Col Pct                                                                         | Pre-survey                     | Post-survey                    | Re-test                | Total         |
| <b>The police</b>                                                                                                  | 25<br>3.34<br>69.44<br>6.65    | 11<br>1.47<br>30.56<br>2.95    | 0<br>0.00<br>0.00<br>. | 36<br>4.81    |
| <b>ChildLine only</b>                                                                                              | 85<br>11.35<br>40.28<br>22.61  | 126<br>16.82<br>59.72<br>33.78 | 0<br>0.00<br>0.00<br>. | 211<br>28.17  |
| <b>My supervisor only</b>                                                                                          | 19<br>2.54<br>86.36<br>5.05    | 3<br>0.40<br>13.64<br>0.80     | 0<br>0.00<br>0.00<br>. | 22<br>2.94    |
| <b>Both ChildLine and my supervisor</b>                                                                            | 203<br>27.10<br>46.77<br>53.99 | 231<br>30.84<br>53.23<br>61.93 | 0<br>0.00<br>0.00<br>. | 434<br>57.94  |
| <b>I am unsure</b>                                                                                                 | 44<br>5.87<br>95.65<br>11.70   | 2<br>0.27<br>4.35<br>0.54      | 0<br>0.00<br>0.00<br>. | 46<br>6.14    |
| <b>Total</b>                                                                                                       | 376<br>50.20                   | 373<br>49.80                   | 0<br>0.00              | 749<br>100.00 |
| Frequency Missing = 1                                                                                              |                                |                                |                        |               |

| Knowledge Question 8 correct |           |         |                      |                    |
|------------------------------|-----------|---------|----------------------|--------------------|
| know_q8_correct              | Frequency | Percent | Cumulative Frequency | Cumulative Percent |
| no                           | 875       | 47.14   | 875                  | 47.14              |
| YES                          | 981       | 52.86   | 1856                 | 100.00             |
| Frequency Missing = 1        |           |         |                      |                    |

| Table 1 of know_q8_correct by event           |                                |                                |                                |                |
|-----------------------------------------------|--------------------------------|--------------------------------|--------------------------------|----------------|
| Controlling for group=Control                 |                                |                                |                                |                |
| know_q8_correct(Knowledge Question 8 correct) | event(Time)                    |                                |                                |                |
| Frequency<br>Percent<br>Row Pct<br>Col Pct    | Pre-survey                     | Post-survey                    | Re-test                        | Total          |
| no                                            | 202<br>18.25<br>36.07<br>54.45 | 158<br>14.27<br>28.21<br>43.29 | 200<br>18.07<br>35.71<br>53.91 | 560<br>50.59   |
| YES                                           | 169<br>15.27<br>30.90<br>45.55 | 207<br>18.70<br>37.84<br>56.71 | 171<br>15.45<br>31.26<br>46.09 | 547<br>49.41   |
| Total                                         | 371<br>33.51                   | 365<br>32.97                   | 371<br>33.51                   | 1107<br>100.00 |

| Table 2 of know_q8_correct by event           |                                |                                |                        |               |
|-----------------------------------------------|--------------------------------|--------------------------------|------------------------|---------------|
| Controlling for group=Experimental            |                                |                                |                        |               |
| know_q8_correct(Knowledge Question 8 correct) | event(Time)                    |                                |                        |               |
| Frequency<br>Percent<br>Row Pct<br>Col Pct    | Pre-survey                     | Post-survey                    | Re-test                | Total         |
| no                                            | 173<br>23.10<br>54.92<br>46.01 | 142<br>18.96<br>45.08<br>38.07 | 0<br>0.00<br>0.00<br>. | 315<br>42.06  |
| YES                                           | 203<br>27.10<br>46.77<br>53.99 | 231<br>30.84<br>53.23<br>61.93 | 0<br>0.00<br>0.00<br>. | 434<br>57.94  |
| Total                                         | 376<br>50.20                   | 373<br>49.80                   | 0<br>0.00              | 749<br>100.00 |
| Frequency Missing = 1                         |                                |                                |                        |               |

| To count as physical child abuse, it must result in a child experiencing: |           |         |                      |                    |
|---------------------------------------------------------------------------|-----------|---------|----------------------|--------------------|
| know_q9                                                                   | Frequency | Percent | Cumulative Frequency | Cumulative Percent |
| Severe pain                                                               | 37        | 4.95    | 37                   | 4.95               |
| Any pain                                                                  | 407       | 54.48   | 444                  | 59.44              |
| Substantial pain                                                          | 119       | 15.93   | 563                  | 75.37              |
| Long-lasting pain                                                         | 43        | 5.76    | 606                  | 81.12              |
| I am unsure                                                               | 141       | 18.88   | 747                  | 100.00             |
| Frequency Missing = 1110                                                  |           |         |                      |                    |

| Table 1 of know_q9 by event                                                        |                                 |                        |                        |               |
|------------------------------------------------------------------------------------|---------------------------------|------------------------|------------------------|---------------|
| Controlling for group=Control                                                      |                                 |                        |                        |               |
| know_q9(To count as physical child abuse, it must result in a child experiencing:) | event(Time)                     |                        |                        |               |
| Frequency<br>Percent<br>Row Pct<br>Col Pct                                         | Pre-survey                      | Post-survey            | Re-test                | Total         |
| Severe pain                                                                        | 10<br>2.70<br>100.00<br>2.70    | 0<br>0.00<br>0.00<br>. | 0<br>0.00<br>0.00<br>. | 10<br>2.70    |
| Any pain                                                                           | 203<br>54.72<br>100.00<br>54.72 | 0<br>0.00<br>0.00<br>. | 0<br>0.00<br>0.00<br>. | 203<br>54.72  |
| Substantial pain                                                                   | 62<br>16.71<br>100.00<br>16.71  | 0<br>0.00<br>0.00<br>. | 0<br>0.00<br>0.00<br>. | 62<br>16.71   |
| Long-lasting pain                                                                  | 25<br>6.74<br>100.00<br>6.74    | 0<br>0.00<br>0.00<br>. | 0<br>0.00<br>0.00<br>. | 25<br>6.74    |
| I am unsure                                                                        | 71<br>19.14<br>100.00<br>19.14  | 0<br>0.00<br>0.00<br>. | 0<br>0.00<br>0.00<br>. | 71<br>19.14   |
| Total                                                                              | 371<br>100.00                   | 0<br>0.00              | 0<br>0.00              | 371<br>100.00 |
| Frequency Missing = 736                                                            |                                 |                        |                        |               |

| Table 2 of know_q9 by event                                                                       |                                 |                        |                        |               |
|---------------------------------------------------------------------------------------------------|---------------------------------|------------------------|------------------------|---------------|
| Controlling for group=Experimental                                                                |                                 |                        |                        |               |
| know_q9(To<br>count as physical<br>child abuse, it<br>must result in a<br>child<br>experiencing:) | event(Time)                     |                        |                        |               |
| Frequency<br>Percent<br>Row Pct<br>Col Pct                                                        | Pre-survey                      | Post-survey            | Re-test                | Total         |
| Severe pain                                                                                       | 27<br>7.18<br>100.00<br>7.18    | 0<br>0.00<br>0.00<br>. | 0<br>0.00<br>0.00<br>. | 27<br>7.18    |
| Any pain                                                                                          | 204<br>54.26<br>100.00<br>54.26 | 0<br>0.00<br>0.00<br>. | 0<br>0.00<br>0.00<br>. | 204<br>54.26  |
| Substantial pain                                                                                  | 57<br>15.16<br>100.00<br>15.16  | 0<br>0.00<br>0.00<br>. | 0<br>0.00<br>0.00<br>. | 57<br>15.16   |
| Long-lasting pain                                                                                 | 18<br>4.79<br>100.00<br>4.79    | 0<br>0.00<br>0.00<br>. | 0<br>0.00<br>0.00<br>. | 18<br>4.79    |
| I am unsure                                                                                       | 70<br>18.62<br>100.00<br>18.62  | 0<br>0.00<br>0.00<br>. | 0<br>0.00<br>0.00<br>. | 70<br>18.62   |
| Total                                                                                             | 376<br>100.00                   | 0<br>0.00              | 0<br>0.00              | 376<br>100.00 |
| Frequency Missing = 374                                                                           |                                 |                        |                        |               |

| Knowledge Question 9 correct |           |         |                      |                    |
|------------------------------|-----------|---------|----------------------|--------------------|
| know_q9_correct              | Frequency | Percent | Cumulative Frequency | Cumulative Percent |
| no                           | 628       | 84.07   | 628                  | 84.07              |
| YES                          | 119       | 15.93   | 747                  | 100.00             |
| Frequency Missing = 1110     |           |         |                      |                    |

| Table 1 of know_q9_correct by event           |                                 |                        |                        |               |
|-----------------------------------------------|---------------------------------|------------------------|------------------------|---------------|
| Controlling for group=Control                 |                                 |                        |                        |               |
| know_q9_correct(Knowledge Question 9 correct) | event(Time)                     |                        |                        |               |
| Frequency<br>Percent<br>Row Pct<br>Col Pct    | Pre-survey                      | Post-survey            | Re-test                | Total         |
| no                                            | 309<br>83.29<br>100.00<br>83.29 | 0<br>0.00<br>0.00<br>. | 0<br>0.00<br>0.00<br>. | 309<br>83.29  |
| YES                                           | 62<br>16.71<br>100.00<br>16.71  | 0<br>0.00<br>0.00<br>. | 0<br>0.00<br>0.00<br>. | 62<br>16.71   |
| Total                                         | 371<br>100.00                   | 0<br>0.00              | 0<br>0.00              | 371<br>100.00 |
| Frequency Missing = 736                       |                                 |                        |                        |               |

| Table 2 of know_q9_correct by event           |                                 |                        |                        |               |
|-----------------------------------------------|---------------------------------|------------------------|------------------------|---------------|
| Controlling for group=Experimental            |                                 |                        |                        |               |
| know_q9_correct(Knowledge Question 9 correct) | event(Time)                     |                        |                        |               |
| Frequency<br>Percent<br>Row Pct<br>Col Pct    | Pre-survey                      | Post-survey            | Re-test                | Total         |
| no                                            | 319<br>84.84<br>100.00<br>84.84 | 0<br>0.00<br>0.00<br>. | 0<br>0.00<br>0.00<br>. | 319<br>84.84  |
| YES                                           | 57<br>15.16<br>100.00<br>15.16  | 0<br>0.00<br>0.00<br>. | 0<br>0.00<br>0.00<br>. | 57<br>15.16   |
| Total                                         | 376<br>100.00                   | 0<br>0.00              | 0<br>0.00              | 376<br>100.00 |
| Frequency Missing = 374                       |                                 |                        |                        |               |

| Under Pennsylvania law, are you required to report suspected child abuse/neglect if a child was put at significant risk for being injured even when no injury or harm actually occurred? |           |         |                      |                    |
|------------------------------------------------------------------------------------------------------------------------------------------------------------------------------------------|-----------|---------|----------------------|--------------------|
| know_q10                                                                                                                                                                                 | Frequency | Percent | Cumulative Frequency | Cumulative Percent |
| no                                                                                                                                                                                       | 54        | 2.91    | 54                   | 2.91               |
| YES                                                                                                                                                                                      | 1538      | 82.87   | 1592                 | 85.78              |
| Unsure                                                                                                                                                                                   | 264       | 14.22   | 1856                 | 100.00             |
| Frequency Missing = 1                                                                                                                                                                    |           |         |                      |                    |

| Table 1 of know_q10 by event                                                                                                                                                                       |                                |                                |                                |                |
|----------------------------------------------------------------------------------------------------------------------------------------------------------------------------------------------------|--------------------------------|--------------------------------|--------------------------------|----------------|
| Controlling for group=Control                                                                                                                                                                      |                                |                                |                                |                |
| know_q10(Under Pennsylvania law, are you required to report suspected child abuse/neglect if a child was put at significant risk for being injured even when no injury or harm actually occurred?) | event(Time)                    |                                |                                |                |
| Frequency<br>Percent<br>Row Pct<br>Col Pct                                                                                                                                                         | Pre-survey                     | Post-survey                    | Re-test                        | Total          |
| no                                                                                                                                                                                                 | 23<br>2.08<br>58.97<br>6.20    | 9<br>0.81<br>23.08<br>2.47     | 7<br>0.63<br>17.95<br>1.89     | 39<br>3.52     |
| YES                                                                                                                                                                                                | 264<br>23.85<br>29.50<br>71.16 | 349<br>31.53<br>38.99<br>95.62 | 282<br>25.47<br>31.51<br>76.01 | 895<br>80.85   |
| Unsure                                                                                                                                                                                             | 84<br>7.59<br>48.55<br>22.64   | 7<br>0.63<br>4.05<br>1.92      | 82<br>7.41<br>47.40<br>22.10   | 173<br>15.63   |
| Total                                                                                                                                                                                              | 371<br>33.51                   | 365<br>32.97                   | 371<br>33.51                   | 1107<br>100.00 |

| Table 2 of know_q10 by event                                                                                                                                                                                                              |                                |                                |                        |               |
|-------------------------------------------------------------------------------------------------------------------------------------------------------------------------------------------------------------------------------------------|--------------------------------|--------------------------------|------------------------|---------------|
| Controlling for group=Experimental                                                                                                                                                                                                        |                                |                                |                        |               |
| know_q10(Under<br>Pennsylvania<br>law, are you<br>required to<br>report suspected<br>child<br>abuse/neglect if a<br>child was put at<br>significant risk<br>for being injured<br>even when no<br>injury or harm<br>actually<br>occurred?) | event(Time)                    |                                |                        |               |
| Frequency<br>Percent<br>Row Pct<br>Col Pct                                                                                                                                                                                                | Pre-survey                     | Post-survey                    | Re-test                | Total         |
| <b>no</b>                                                                                                                                                                                                                                 | 10<br>1.34<br>66.67<br>2.66    | 5<br>0.67<br>33.33<br>1.34     | 0<br>0.00<br>0.00<br>. | 15<br>2.00    |
| <b>YES</b>                                                                                                                                                                                                                                | 278<br>37.12<br>43.23<br>73.94 | 365<br>48.73<br>56.77<br>97.86 | 0<br>0.00<br>0.00<br>. | 643<br>85.85  |
| <b>Unsure</b>                                                                                                                                                                                                                             | 88<br>11.75<br>96.70<br>23.40  | 3<br>0.40<br>3.30<br>0.80      | 0<br>0.00<br>0.00<br>. | 91<br>12.15   |
| <b>Total</b>                                                                                                                                                                                                                              | 376<br>50.20                   | 373<br>49.80                   | 0<br>0.00              | 749<br>100.00 |
| Frequency Missing = 1                                                                                                                                                                                                                     |                                |                                |                        |               |

| Knowledge Question 10 correct |           |         |                      |                    |
|-------------------------------|-----------|---------|----------------------|--------------------|
| know_q10_correct              | Frequency | Percent | Cumulative Frequency | Cumulative Percent |
| no                            | 318       | 17.13   | 318                  | 17.13              |
| YES                           | 1538      | 82.87   | 1856                 | 100.00             |
| Frequency Missing = 1         |           |         |                      |                    |

| Table 1 of know_q10_correct by event            |                                |                                |                                |                |
|-------------------------------------------------|--------------------------------|--------------------------------|--------------------------------|----------------|
| Controlling for group=Control                   |                                |                                |                                |                |
| know_q10_correct(Knowledge Question 10 correct) | event(Time)                    |                                |                                |                |
| Frequency<br>Percent<br>Row Pct<br>Col Pct      | Pre-survey                     | Post-survey                    | Re-test                        | Total          |
| no                                              | 107<br>9.67<br>50.47<br>28.84  | 16<br>1.45<br>7.55<br>4.38     | 89<br>8.04<br>41.98<br>23.99   | 212<br>19.15   |
| YES                                             | 264<br>23.85<br>29.50<br>71.16 | 349<br>31.53<br>38.99<br>95.62 | 282<br>25.47<br>31.51<br>76.01 | 895<br>80.85   |
| Total                                           | 371<br>33.51                   | 365<br>32.97                   | 371<br>33.51                   | 1107<br>100.00 |

| Table 2 of know_q10_correct by event            |                                |                                |                        |               |
|-------------------------------------------------|--------------------------------|--------------------------------|------------------------|---------------|
| Controlling for group=Experimental              |                                |                                |                        |               |
| know_q10_correct(Knowledge Question 10 correct) | event(Time)                    |                                |                        |               |
| Frequency<br>Percent<br>Row Pct<br>Col Pct      | Pre-survey                     | Post-survey                    | Re-test                | Total         |
| no                                              | 98<br>13.08<br>92.45<br>26.06  | 8<br>1.07<br>7.55<br>2.14      | 0<br>0.00<br>0.00<br>. | 106<br>14.15  |
| YES                                             | 278<br>37.12<br>43.23<br>73.94 | 365<br>48.73<br>56.77<br>97.86 | 0<br>0.00<br>0.00<br>. | 643<br>85.85  |
| Total                                           | 376<br>50.20                   | 373<br>49.80                   | 0<br>0.00              | 749<br>100.00 |
| Frequency Missing = 1                           |                                |                                |                        |               |

| Requirements for reporting suspected child abuse/neglect<br>refer to recent events. How long ago counts as recent under<br>Pennsylvania law? |           |         |                         |                       |
|----------------------------------------------------------------------------------------------------------------------------------------------|-----------|---------|-------------------------|-----------------------|
| know_q11                                                                                                                                     | Frequency | Percent | Cumulative<br>Frequency | Cumulative<br>Percent |
| 1 day                                                                                                                                        | 95        | 12.72   | 95                      | 12.72                 |
| 1 week                                                                                                                                       | 90        | 12.05   | 185                     | 24.77                 |
| 1 month                                                                                                                                      | 81        | 10.84   | 266                     | 35.61                 |
| 1 year                                                                                                                                       | 41        | 5.49    | 307                     | 41.10                 |
| 2 years                                                                                                                                      | 54        | 7.23    | 361                     | 48.33                 |
| I am unsure                                                                                                                                  | 386       | 51.67   | 747                     | 100.00                |
| Frequency Missing = 1110                                                                                                                     |           |         |                         |                       |

| Table 1 of know_q11 by event                                                                                                                     |                                 |                        |                        |               |
|--------------------------------------------------------------------------------------------------------------------------------------------------|---------------------------------|------------------------|------------------------|---------------|
| Controlling for group=Control                                                                                                                    |                                 |                        |                        |               |
| know_q11(Requirements for reporting suspected child abuse/neglect refer to recent events. How long ago counts as recent under Pennsylvania law?) | event(Time)                     |                        |                        |               |
| Frequency<br>Percent<br>Row Pct<br>Col Pct                                                                                                       | Pre-survey                      | Post-survey            | Re-test                | Total         |
| <b>1 day</b>                                                                                                                                     | 43<br>11.59<br>100.00<br>11.59  | 0<br>0.00<br>0.00<br>. | 0<br>0.00<br>0.00<br>. | 43<br>11.59   |
| <b>1 week</b>                                                                                                                                    | 39<br>10.51<br>100.00<br>10.51  | 0<br>0.00<br>0.00<br>. | 0<br>0.00<br>0.00<br>. | 39<br>10.51   |
| <b>1 month</b>                                                                                                                                   | 38<br>10.24<br>100.00<br>10.24  | 0<br>0.00<br>0.00<br>. | 0<br>0.00<br>0.00<br>. | 38<br>10.24   |
| <b>1 year</b>                                                                                                                                    | 22<br>5.93<br>100.00<br>5.93    | 0<br>0.00<br>0.00<br>. | 0<br>0.00<br>0.00<br>. | 22<br>5.93    |
| <b>2 years</b>                                                                                                                                   | 25<br>6.74<br>100.00<br>6.74    | 0<br>0.00<br>0.00<br>. | 0<br>0.00<br>0.00<br>. | 25<br>6.74    |
| <b>I am unsure</b>                                                                                                                               | 204<br>54.99<br>100.00<br>54.99 | 0<br>0.00<br>0.00<br>. | 0<br>0.00<br>0.00<br>. | 204<br>54.99  |
| <b>Total</b>                                                                                                                                     | 371<br>100.00                   | 0<br>0.00              | 0<br>0.00              | 371<br>100.00 |
| Frequency Missing = 736                                                                                                                          |                                 |                        |                        |               |

| Table 2 of know_q11 by event                                                                                                                     |                                 |                        |                        |               |
|--------------------------------------------------------------------------------------------------------------------------------------------------|---------------------------------|------------------------|------------------------|---------------|
| Controlling for group=Experimental                                                                                                               |                                 |                        |                        |               |
| know_q11(Requirements for reporting suspected child abuse/neglect refer to recent events. How long ago counts as recent under Pennsylvania law?) | event(Time)                     |                        |                        |               |
| Frequency<br>Percent<br>Row Pct<br>Col Pct                                                                                                       | Pre-survey                      | Post-survey            | Re-test                | Total         |
| <b>1 day</b>                                                                                                                                     | 52<br>13.83<br>100.00<br>13.83  | 0<br>0.00<br>0.00<br>. | 0<br>0.00<br>0.00<br>. | 52<br>13.83   |
| <b>1 week</b>                                                                                                                                    | 51<br>13.56<br>100.00<br>13.56  | 0<br>0.00<br>0.00<br>. | 0<br>0.00<br>0.00<br>. | 51<br>13.56   |
| <b>1 month</b>                                                                                                                                   | 43<br>11.44<br>100.00<br>11.44  | 0<br>0.00<br>0.00<br>. | 0<br>0.00<br>0.00<br>. | 43<br>11.44   |
| <b>1 year</b>                                                                                                                                    | 19<br>5.05<br>100.00<br>5.05    | 0<br>0.00<br>0.00<br>. | 0<br>0.00<br>0.00<br>. | 19<br>5.05    |
| <b>2 years</b>                                                                                                                                   | 29<br>7.71<br>100.00<br>7.71    | 0<br>0.00<br>0.00<br>. | 0<br>0.00<br>0.00<br>. | 29<br>7.71    |
| <b>I am unsure</b>                                                                                                                               | 182<br>48.40<br>100.00<br>48.40 | 0<br>0.00<br>0.00<br>. | 0<br>0.00<br>0.00<br>. | 182<br>48.40  |
| <b>Total</b>                                                                                                                                     | 376<br>100.00                   | 0<br>0.00              | 0<br>0.00              | 376<br>100.00 |
| Frequency Missing = 374                                                                                                                          |                                 |                        |                        |               |

| Knowledge Question 11 correct |           |         |                      |                    |
|-------------------------------|-----------|---------|----------------------|--------------------|
| know_q11_correct              | Frequency | Percent | Cumulative Frequency | Cumulative Percent |
| no                            | 693       | 92.77   | 693                  | 92.77              |
| YES                           | 54        | 7.23    | 747                  | 100.00             |
| Frequency Missing = 1110      |           |         |                      |                    |

| Table 1 of know_q11_correct by event            |                                 |                        |                        |               |
|-------------------------------------------------|---------------------------------|------------------------|------------------------|---------------|
| Controlling for group=Control                   |                                 |                        |                        |               |
| know_q11_correct(Knowledge Question 11 correct) | event(Time)                     |                        |                        |               |
| Frequency<br>Percent<br>Row Pct<br>Col Pct      | Pre-survey                      | Post-survey            | Re-test                | Total         |
| no                                              | 346<br>93.26<br>100.00<br>93.26 | 0<br>0.00<br>0.00<br>. | 0<br>0.00<br>0.00<br>. | 346<br>93.26  |
| YES                                             | 25<br>6.74<br>100.00<br>6.74    | 0<br>0.00<br>0.00<br>. | 0<br>0.00<br>0.00<br>. | 25<br>6.74    |
| Total                                           | 371<br>100.00                   | 0<br>0.00              | 0<br>0.00              | 371<br>100.00 |
| Frequency Missing = 736                         |                                 |                        |                        |               |

| Table 2 of know_q11_correct by event            |                                 |                        |                        |               |
|-------------------------------------------------|---------------------------------|------------------------|------------------------|---------------|
| Controlling for group=Experimental              |                                 |                        |                        |               |
| know_q11_correct(Knowledge Question 11 correct) | event(Time)                     |                        |                        |               |
| Frequency<br>Percent<br>Row Pct<br>Col Pct      | Pre-survey                      | Post-survey            | Re-test                | Total         |
| no                                              | 347<br>92.29<br>100.00<br>92.29 | 0<br>0.00<br>0.00<br>. | 0<br>0.00<br>0.00<br>. | 347<br>92.29  |
| YES                                             | 29<br>7.71<br>100.00<br>7.71    | 0<br>0.00<br>0.00<br>. | 0<br>0.00<br>0.00<br>. | 29<br>7.71    |
| Total                                           | 376<br>100.00                   | 0<br>0.00              | 0<br>0.00              | 376<br>100.00 |
| Frequency Missing = 374                         |                                 |                        |                        |               |

| Do you feel confident in your ability to identify signs of child abuse/neglect? |           |         |                      |                    |
|---------------------------------------------------------------------------------|-----------|---------|----------------------|--------------------|
| know_q12                                                                        | Frequency | Percent | Cumulative Frequency | Cumulative Percent |
| no                                                                              | 60        | 5.41    | 60                   | 5.41               |
| YES                                                                             | 1049      | 94.59   | 1109                 | 100.00             |
| Frequency Missing = 748                                                         |           |         |                      |                    |

| Table 1 of know_q12 by event                                                              |                        |                                |                                |               |
|-------------------------------------------------------------------------------------------|------------------------|--------------------------------|--------------------------------|---------------|
| Controlling for group=Control                                                             |                        |                                |                                |               |
| know_q12(Do you feel confident in your ability to identify signs of child abuse/neglect?) | event(Time)            |                                |                                |               |
| Frequency<br>Percent<br>Row Pct<br>Col Pct                                                | Pre-survey             | Post-survey                    | Re-test                        | Total         |
| no                                                                                        | 0<br>0.00<br>0.00<br>. | 3<br>0.41<br>5.08<br>0.82      | 56<br>7.61<br>94.92<br>15.09   | 59<br>8.02    |
| YES                                                                                       | 0<br>0.00<br>0.00<br>. | 362<br>49.18<br>53.47<br>99.18 | 315<br>42.80<br>46.53<br>84.91 | 677<br>91.98  |
| Total                                                                                     | 0<br>0.00              | 365<br>49.59                   | 371<br>50.41                   | 736<br>100.00 |
| Frequency Missing = 371                                                                   |                        |                                |                                |               |

| Table 2 of know_q12 by event                                                                                |                        |                                 |                        |               |
|-------------------------------------------------------------------------------------------------------------|------------------------|---------------------------------|------------------------|---------------|
| Controlling for group=Experimental                                                                          |                        |                                 |                        |               |
| know_q12(Do<br>you feel<br>confident in<br>your ability to<br>identify signs of<br>child<br>abuse/neglect?) | event(Time)            |                                 |                        |               |
| Frequency<br>Percent<br>Row Pct<br>Col Pct                                                                  | Pre-survey             | Post-survey                     | Re-test                | Total         |
| no                                                                                                          | 0<br>0.00<br>0.00<br>. | 1<br>0.27<br>100.00<br>0.27     | 0<br>0.00<br>0.00<br>. | 1<br>0.27     |
| YES                                                                                                         | 0<br>0.00<br>0.00<br>. | 372<br>99.73<br>100.00<br>99.73 | 0<br>0.00<br>0.00<br>. | 372<br>99.73  |
| Total                                                                                                       | 0<br>0.00              | 373<br>100.00                   | 0<br>0.00              | 373<br>100.00 |
| Frequency Missing = 377                                                                                     |                        |                                 |                        |               |

| <b>How prepared do you feel to report child abuse/neglect should the need arise?</b> |                  |                |                             |                           |
|--------------------------------------------------------------------------------------|------------------|----------------|-----------------------------|---------------------------|
| <b>know_q13</b>                                                                      | <b>Frequency</b> | <b>Percent</b> | <b>Cumulative Frequency</b> | <b>Cumulative Percent</b> |
| <b>Entirely unprepared</b>                                                           | 12               | 1.08           | 12                          | 1.08                      |
| <b>Unprepared</b>                                                                    | 11               | 0.99           | 23                          | 2.07                      |
| <b>Somewhat unprepared</b>                                                           | 22               | 1.98           | 45                          | 4.06                      |
| <b>Neither prepared nor unprepared</b>                                               | 89               | 8.03           | 134                         | 12.08                     |
| <b>Somewhat prepared</b>                                                             | 146              | 13.17          | 280                         | 25.25                     |
| <b>Prepared</b>                                                                      | 394              | 35.53          | 674                         | 60.78                     |
| <b>Very well prepared</b>                                                            | 435              | 39.22          | 1109                        | 100.00                    |
| <b>Frequency Missing = 748</b>                                                       |                  |                |                             |                           |

| Table 1 of know_q13 by event                                                            |                        |                                |                                |               |
|-----------------------------------------------------------------------------------------|------------------------|--------------------------------|--------------------------------|---------------|
| Controlling for group=Control                                                           |                        |                                |                                |               |
| know_q13(How prepared do you feel to report child abuse/neglect should the need arise?) | event(Time)            |                                |                                |               |
| Frequency<br>Percent<br>Row Pct<br>Col Pct                                              | Pre-survey             | Post-survey                    | Re-test                        | Total         |
| Entirely unprepared                                                                     | 0<br>0.00<br>0.00<br>. | 5<br>0.68<br>41.67<br>1.37     | 7<br>0.95<br>58.33<br>1.89     | 12<br>1.63    |
| Unprepared                                                                              | 0<br>0.00<br>0.00<br>. | 0<br>0.00<br>0.00<br>0.00      | 10<br>1.36<br>100.00<br>2.70   | 10<br>1.36    |
| Somewhat unprepared                                                                     | 0<br>0.00<br>0.00<br>. | 0<br>0.00<br>0.00<br>0.00      | 21<br>2.85<br>100.00<br>5.66   | 21<br>2.85    |
| Neither prepared nor unprepared                                                         | 0<br>0.00<br>0.00<br>. | 10<br>1.36<br>12.66<br>2.74    | 69<br>9.38<br>87.34<br>18.60   | 79<br>10.73   |
| Somewhat prepared                                                                       | 0<br>0.00<br>0.00<br>. | 29<br>3.94<br>28.43<br>7.95    | 73<br>9.92<br>71.57<br>19.68   | 102<br>13.86  |
| Prepared                                                                                | 0<br>0.00<br>0.00<br>. | 122<br>16.58<br>52.59<br>33.42 | 110<br>14.95<br>47.41<br>29.65 | 232<br>31.52  |
| Very well prepared                                                                      | 0<br>0.00<br>0.00<br>. | 199<br>27.04<br>71.07<br>54.52 | 81<br>11.01<br>28.93<br>21.83  | 280<br>38.04  |
| Total                                                                                   | 0<br>0.00              | 365<br>49.59                   | 371<br>50.41                   | 736<br>100.00 |
| Frequency Missing = 371                                                                 |                        |                                |                                |               |

| Table 2 of know_q13 by event                                                            |                        |                                 |                        |               |
|-----------------------------------------------------------------------------------------|------------------------|---------------------------------|------------------------|---------------|
| Controlling for group=Experimental                                                      |                        |                                 |                        |               |
| know_q13(How prepared do you feel to report child abuse/neglect should the need arise?) | event(Time)            |                                 |                        |               |
| Frequency<br>Percent<br>Row Pct<br>Col Pct                                              | Pre-survey             | Post-survey                     | Re-test                | Total         |
| Entirely unprepared                                                                     | 0<br>0.00<br>.<br>.    | 0<br>0.00<br>.<br>0.00          | 0<br>0.00<br>.<br>.    | 0<br>0.00     |
| Unprepared                                                                              | 0<br>0.00<br>0.00<br>. | 1<br>0.27<br>100.00<br>0.27     | 0<br>0.00<br>0.00<br>. | 1<br>0.27     |
| Somewhat unprepared                                                                     | 0<br>0.00<br>0.00<br>. | 1<br>0.27<br>100.00<br>0.27     | 0<br>0.00<br>0.00<br>. | 1<br>0.27     |
| Neither prepared nor unprepared                                                         | 0<br>0.00<br>0.00<br>. | 10<br>2.68<br>100.00<br>2.68    | 0<br>0.00<br>0.00<br>. | 10<br>2.68    |
| Somewhat prepared                                                                       | 0<br>0.00<br>0.00<br>. | 44<br>11.80<br>100.00<br>11.80  | 0<br>0.00<br>0.00<br>. | 44<br>11.80   |
| Prepared                                                                                | 0<br>0.00<br>0.00<br>. | 162<br>43.43<br>100.00<br>43.43 | 0<br>0.00<br>0.00<br>. | 162<br>43.43  |
| Very well prepared                                                                      | 0<br>0.00<br>0.00<br>. | 155<br>41.55<br>100.00<br>41.55 | 0<br>0.00<br>0.00<br>. | 155<br>41.55  |
| Total                                                                                   | 0<br>0.00              | 373<br>100.00                   | 0<br>0.00              | 373<br>100.00 |
| Frequency Missing = 377                                                                 |                        |                                 |                        |               |
