# Supplementary material
Source: publisher figshare collection journal article supplement (https://plos.figshare.com/articles/dataset/_/5025842)
Supplement: Supplementary file 1 [file 1 › S5 File.pdf]

*Data dictionary***S5 File Data repository - Attitudes**

|                            |                           |                             |      |
|----------------------------|---------------------------|-----------------------------|------|
| <b>Data Set Name</b>       | WORK.ATTITUDE             | <b>Observations</b>         | 1858 |
| <b>Member Type</b>         | DATA                      | <b>Variables</b>            | 18   |
| <b>Engine</b>              | V9                        | <b>Indexes</b>              | 0    |
| <b>Created</b>             | 08/15/2014 10:53:47       | <b>Observation Length</b>   | 144  |
| <b>Last Modified</b>       | 08/15/2014 10:53:47       | <b>Deleted Observations</b> | 0    |
| <b>Protection</b>          |                           | <b>Compressed</b>           | NO   |
| <b>Data Set Type</b>       |                           | <b>Sorted</b>               | NO   |
| <b>Label</b>               |                           |                             |      |
| <b>Data Representation</b> | WINDOWS_64                |                             |      |
| <b>Encoding</b>            | wlatin1 Western (Windows) |                             |      |

| Alphabetic List of Variables and Attributes |             |      |     |           |          |                                                                                                                              |
|---------------------------------------------|-------------|------|-----|-----------|----------|------------------------------------------------------------------------------------------------------------------------------|
| #                                           | Variable    | Type | Len | Format    | Informat | Label                                                                                                                        |
| 6                                           | attitude_a  | Num  | 8   | AGREE.    |          | I might not report child abuse/neglect for fear of backlash from the family or others.                                       |
| 7                                           | attitude_b  | Num  | 8   | AGREE.    |          | I might not report child abuse/neglect because it could result in parents doing something bad to their child.                |
| 8                                           | attitude_c  | Num  | 8   | AGREE.    |          | I would like to fulfill my professional responsibility by reporting cases where I suspect child abuse/neglect.               |
| 9                                           | attitude_d  | Num  | 8   | AGREE.    |          | Reporting cases of suspected child abuse/neglect improves children's safety.                                                 |
| 10                                          | attitude_e  | Num  | 8   | AGREE.    |          | I would not report child abuse/neglect if I thought the child would be removed from his/her family.                          |
| 11                                          | attitude_f  | Num  | 8   | AGREE.    |          | Reporting suspected child abuse/neglect can result in children and families receiving helpful services.                      |
| 12                                          | attitude_g  | Num  | 8   | AGREE.    |          | Early childhood practitioners should be required by law to report suspected child abuse/neglect.                             |
| 13                                          | attitude_h  | Num  | 8   | AGREE.    |          | Children's long-term interests are promoted by early childhood practitioners reporting suspected child abuse/neglect         |
| 14                                          | attitude_i  | Num  | 8   | AGREE.    |          | I am concerned that I could be held legally liable for reporting child abuse/neglect that turns out to be unfounded          |
| 15                                          | attitude_j  | Num  | 8   | AGREE.    |          | It is a waste of time to report child abuse/neglect because often no one follows up on the report                            |
| 16                                          | attitude_k  | Num  | 8   | AGREE.    |          | I should still report suspected child abuse/neglect even if my work supervisor disagrees with me                             |
| 17                                          | attitude_l  | Num  | 8   | AGREE.    |          | I have little confidence that Children and Youth Services will respond effectively if I report suspected child abuse/neglect |
| 18                                          | attitude_m  | Num  | 8   | AGREE.    |          | I would not report suspected child abuse/neglect because it is too hard to be sure that abuse occurred                       |
| 4                                           | date        | Num  | 8   | MMDDYY10. |          | Date of submission                                                                                                           |
| 1                                           | dim_user_id | Num  | 8   | BEST12.   | BEST32.  | dim_user_idect ID                                                                                                            |

*Data dictionary*

| Alphabetic List of Variables and Attributes |          |      |     |               |          |                    |
|---------------------------------------------|----------|------|-----|---------------|----------|--------------------|
| #                                           | Variable | Type | Len | Format        | Informat | Label              |
| 2                                           | event    | Num  | 8   | LESSONTYPEID. |          | Time               |
| 3                                           | group    | Num  | 8   | GRP.          |          | Study group        |
| 5                                           | time     | Num  | 8   | TIME.         |          | Time of submission |

### *Summary*

| <b>I might not report child abuse/neglect for fear of backlash from the family or others.</b> |                  |                |                             |                           |
|-----------------------------------------------------------------------------------------------|------------------|----------------|-----------------------------|---------------------------|
| <b>attitude_a</b>                                                                             | <b>Frequency</b> | <b>Percent</b> | <b>Cumulative Frequency</b> | <b>Cumulative Percent</b> |
| <b>Strongly disagree</b>                                                                      | 1006             | 54.17          | 1006                        | 54.17                     |
| <b>Disagree</b>                                                                               | 495              | 26.66          | 1501                        | 80.83                     |
| <b>Somewhat disagree</b>                                                                      | 121              | 6.52           | 1622                        | 87.35                     |
| <b>Neutral</b>                                                                                | 128              | 6.89           | 1750                        | 94.24                     |
| <b>Somewhat agree</b>                                                                         | 50               | 2.69           | 1800                        | 96.93                     |
| <b>Agree</b>                                                                                  | 32               | 1.72           | 1832                        | 98.65                     |
| <b>Strongly agree</b>                                                                         | 25               | 1.35           | 1857                        | 100.00                    |
| <b>Frequency Missing = 1</b>                                                                  |                  |                |                             |                           |

### Summary

| Table 1 of attitude_a by event                                                                     |                                |                                |                                |                |
|----------------------------------------------------------------------------------------------------|--------------------------------|--------------------------------|--------------------------------|----------------|
| Controlling for group=Control                                                                      |                                |                                |                                |                |
| attitude_a(I might not report child abuse/neglect for fear of backlash from the family or others.) | event(Time)                    |                                |                                |                |
| Frequency<br>Percent<br>Row Pct<br>Col Pct                                                         | Pre-survey                     | Post-survey                    | Re-test                        | Total          |
| Strongly disagree                                                                                  | 160<br>14.45<br>26.76<br>43.13 | 251<br>22.67<br>41.97<br>68.77 | 187<br>16.89<br>31.27<br>50.40 | 598<br>54.02   |
| Disagree                                                                                           | 109<br>9.85<br>37.98<br>29.38  | 69<br>6.23<br>24.04<br>18.90   | 109<br>9.85<br>37.98<br>29.38  | 287<br>25.93   |
| Somewhat disagree                                                                                  | 37<br>3.34<br>48.05<br>9.97    | 14<br>1.26<br>18.18<br>3.84    | 26<br>2.35<br>33.77<br>7.01    | 77<br>6.96     |
| Neutral                                                                                            | 34<br>3.07<br>41.98<br>9.16    | 19<br>1.72<br>23.46<br>5.21    | 28<br>2.53<br>34.57<br>7.55    | 81<br>7.32     |
| Somewhat agree                                                                                     | 12<br>1.08<br>42.86<br>3.23    | 6<br>0.54<br>21.43<br>1.64     | 10<br>0.90<br>35.71<br>2.70    | 28<br>2.53     |
| Agree                                                                                              | 8<br>0.72<br>42.11<br>2.16     | 2<br>0.18<br>10.53<br>0.55     | 9<br>0.81<br>47.37<br>2.43     | 19<br>1.72     |
| Strongly agree                                                                                     | 11<br>0.99<br>64.71<br>2.96    | 4<br>0.36<br>23.53<br>1.10     | 2<br>0.18<br>11.76<br>0.54     | 17<br>1.54     |
| Total                                                                                              | 371<br>33.51                   | 365<br>32.97                   | 371<br>33.51                   | 1107<br>100.00 |

### Summary

| Table 2 of attitude_a by event                                                                                    |                                |                                |                        |               |
|-------------------------------------------------------------------------------------------------------------------|--------------------------------|--------------------------------|------------------------|---------------|
| Controlling for group=Experimental                                                                                |                                |                                |                        |               |
| attitude_a(I might<br>not report child<br>abuse/neglect for<br>fear of backlash<br>from the family or<br>others.) | event(Time)                    |                                |                        |               |
| Frequency<br>Percent<br>Row Pct<br>Col Pct                                                                        | Pre-survey                     | Post-survey                    | Re-test                | Total         |
| Strongly disagree                                                                                                 | 165<br>22.00<br>40.44<br>43.77 | 243<br>32.40<br>59.56<br>65.15 | 0<br>0.00<br>0.00<br>. | 408<br>54.40  |
| Disagree                                                                                                          | 112<br>14.93<br>53.85<br>29.71 | 96<br>12.80<br>46.15<br>25.74  | 0<br>0.00<br>0.00<br>. | 208<br>27.73  |
| Somewhat disagree                                                                                                 | 31<br>4.13<br>70.45<br>8.22    | 13<br>1.73<br>29.55<br>3.49    | 0<br>0.00<br>0.00<br>. | 44<br>5.87    |
| Neutral                                                                                                           | 37<br>4.93<br>78.72<br>9.81    | 10<br>1.33<br>21.28<br>2.68    | 0<br>0.00<br>0.00<br>. | 47<br>6.27    |
| Somewhat agree                                                                                                    | 20<br>2.67<br>90.91<br>5.31    | 2<br>0.27<br>9.09<br>0.54      | 0<br>0.00<br>0.00<br>. | 22<br>2.93    |
| Agree                                                                                                             | 7<br>0.93<br>53.85<br>1.86     | 6<br>0.80<br>46.15<br>1.61     | 0<br>0.00<br>0.00<br>. | 13<br>1.73    |
| Strongly agree                                                                                                    | 5<br>0.67<br>62.50<br>1.33     | 3<br>0.40<br>37.50<br>0.80     | 0<br>0.00<br>0.00<br>. | 8<br>1.07     |
| Total                                                                                                             | 377<br>50.27                   | 373<br>49.73                   | 0<br>0.00              | 750<br>100.00 |
| Frequency Missing = 1                                                                                             |                                |                                |                        |               |

### *Summary*

| <b>I might not report child abuse/neglect because it could result in parents doing something bad to their child.</b> |                  |                |                             |                           |
|----------------------------------------------------------------------------------------------------------------------|------------------|----------------|-----------------------------|---------------------------|
| <b>attitude_b</b>                                                                                                    | <b>Frequency</b> | <b>Percent</b> | <b>Cumulative Frequency</b> | <b>Cumulative Percent</b> |
| <b>Strongly disagree</b>                                                                                             | 895              | 48.20          | 895                         | 48.20                     |
| <b>Disagree</b>                                                                                                      | 509              | 27.41          | 1404                        | 75.61                     |
| <b>Somewhat disagree</b>                                                                                             | 169              | 9.10           | 1573                        | 84.71                     |
| <b>Neutral</b>                                                                                                       | 170              | 9.15           | 1743                        | 93.86                     |
| <b>Somewhat agree</b>                                                                                                | 71               | 3.82           | 1814                        | 97.68                     |
| <b>Agree</b>                                                                                                         | 23               | 1.24           | 1837                        | 98.92                     |
| <b>Strongly agree</b>                                                                                                | 20               | 1.08           | 1857                        | 100.00                    |
| <b>Frequency Missing = 1</b>                                                                                         |                  |                |                             |                           |

### Summary

| Table 1 of attitude_b by event                                                                                            |                                |                                |                                |                |
|---------------------------------------------------------------------------------------------------------------------------|--------------------------------|--------------------------------|--------------------------------|----------------|
| Controlling for group=Control                                                                                             |                                |                                |                                |                |
| attitude_b(I might not report child abuse/neglect because it could result in parents doing something bad to their child.) | event(Time)                    |                                |                                |                |
| Frequency<br>Percent<br>Row Pct<br>Col Pct                                                                                | Pre-survey                     | Post-survey                    | Re-test                        | Total          |
| Strongly disagree                                                                                                         | 132<br>11.92<br>25.14<br>35.58 | 237<br>21.41<br>45.14<br>64.93 | 156<br>14.09<br>29.71<br>42.05 | 525<br>47.43   |
| Disagree                                                                                                                  | 100<br>9.03<br>33.67<br>26.95  | 85<br>7.68<br>28.62<br>23.29   | 112<br>10.12<br>37.71<br>30.19 | 297<br>26.83   |
| Somewhat disagree                                                                                                         | 58<br>5.24<br>51.79<br>15.63   | 16<br>1.45<br>14.29<br>4.38    | 38<br>3.43<br>33.93<br>10.24   | 112<br>10.12   |
| Neutral                                                                                                                   | 48<br>4.34<br>46.15<br>12.94   | 18<br>1.63<br>17.31<br>4.93    | 38<br>3.43<br>36.54<br>10.24   | 104<br>9.39    |
| Somewhat agree                                                                                                            | 21<br>1.90<br>48.84<br>5.66    | 5<br>0.45<br>11.63<br>1.37     | 17<br>1.54<br>39.53<br>4.58    | 43<br>3.88     |
| Agree                                                                                                                     | 7<br>0.63<br>50.00<br>1.89     | 1<br>0.09<br>7.14<br>0.27      | 6<br>0.54<br>42.86<br>1.62     | 14<br>1.26     |
| Strongly agree                                                                                                            | 5<br>0.45<br>41.67<br>1.35     | 3<br>0.27<br>25.00<br>0.82     | 4<br>0.36<br>33.33<br>1.08     | 12<br>1.08     |
| Total                                                                                                                     | 371<br>33.51                   | 365<br>32.97                   | 371<br>33.51                   | 1107<br>100.00 |

### Summary

| Table 2 of attitude_b by event                                                                                                              |                                |                                |                        |               |
|---------------------------------------------------------------------------------------------------------------------------------------------|--------------------------------|--------------------------------|------------------------|---------------|
| Controlling for group=Experimental                                                                                                          |                                |                                |                        |               |
| attitude_b(I might<br>not report child<br>abuse/neglect<br>because it could<br>result in parents<br>doing something<br>bad to their child.) | event(Time)                    |                                |                        |               |
| Frequency<br>Percent<br>Row Pct<br>Col Pct                                                                                                  | Pre-survey                     | Post-survey                    | Re-test                | Total         |
| <b>Strongly disagree</b>                                                                                                                    | 148<br>19.73<br>40.00<br>39.26 | 222<br>29.60<br>60.00<br>59.52 | 0<br>0.00<br>0.00<br>. | 370<br>49.33  |
| <b>Disagree</b>                                                                                                                             | 110<br>14.67<br>51.89<br>29.18 | 102<br>13.60<br>48.11<br>27.35 | 0<br>0.00<br>0.00<br>. | 212<br>28.27  |
| <b>Somewhat disagree</b>                                                                                                                    | 37<br>4.93<br>64.91<br>9.81    | 20<br>2.67<br>35.09<br>5.36    | 0<br>0.00<br>0.00<br>. | 57<br>7.60    |
| <b>Neutral</b>                                                                                                                              | 51<br>6.80<br>77.27<br>13.53   | 15<br>2.00<br>22.73<br>4.02    | 0<br>0.00<br>0.00<br>. | 66<br>8.80    |
| <b>Somewhat agree</b>                                                                                                                       | 19<br>2.53<br>67.86<br>5.04    | 9<br>1.20<br>32.14<br>2.41     | 0<br>0.00<br>0.00<br>. | 28<br>3.73    |
| <b>Agree</b>                                                                                                                                | 8<br>1.07<br>88.89<br>2.12     | 1<br>0.13<br>11.11<br>0.27     | 0<br>0.00<br>0.00<br>. | 9<br>1.20     |
| <b>Strongly agree</b>                                                                                                                       | 4<br>0.53<br>50.00<br>1.06     | 4<br>0.53<br>50.00<br>1.07     | 0<br>0.00<br>0.00<br>. | 8<br>1.07     |
| <b>Total</b>                                                                                                                                | 377<br>50.27                   | 373<br>49.73                   | 0<br>0.00              | 750<br>100.00 |
| Frequency Missing = 1                                                                                                                       |                                |                                |                        |               |

### *Summary*

| <b>I would like to fulfill my professional responsibility by reporting cases where I suspect child abuse/neglect.</b> |                  |                |                             |                           |
|-----------------------------------------------------------------------------------------------------------------------|------------------|----------------|-----------------------------|---------------------------|
| <b>attitude_c</b>                                                                                                     | <b>Frequency</b> | <b>Percent</b> | <b>Cumulative Frequency</b> | <b>Cumulative Percent</b> |
| <b>Strongly disagree</b>                                                                                              | 26               | 1.40           | 26                          | 1.40                      |
| <b>Disagree</b>                                                                                                       | 20               | 1.08           | 46                          | 2.48                      |
| <b>Somewhat disagree</b>                                                                                              | 11               | 0.59           | 57                          | 3.07                      |
| <b>Neutral</b>                                                                                                        | 49               | 2.64           | 106                         | 5.71                      |
| <b>Somewhat agree</b>                                                                                                 | 123              | 6.62           | 229                         | 12.33                     |
| <b>Agree</b>                                                                                                          | 442              | 23.80          | 671                         | 36.13                     |
| <b>Strongly agree</b>                                                                                                 | 1186             | 63.87          | 1857                        | 100.00                    |
| <b>Frequency Missing = 1</b>                                                                                          |                  |                |                             |                           |

*Summary*

| Table 1 of attitude_c by event                                                                                             |                                |                                |                                |                |
|----------------------------------------------------------------------------------------------------------------------------|--------------------------------|--------------------------------|--------------------------------|----------------|
| Controlling for group=Control                                                                                              |                                |                                |                                |                |
| attitude_c(I would like to fulfill my professional responsibility by reporting cases where I suspect child abuse/neglect.) | event(Time)                    |                                |                                |                |
| Frequency<br>Percent<br>Row Pct<br>Col Pct                                                                                 | Pre-survey                     | Post-survey                    | Re-test                        | Total          |
| Strongly disagree                                                                                                          | 6<br>0.54<br>50.00<br>1.62     | 3<br>0.27<br>25.00<br>0.82     | 3<br>0.27<br>25.00<br>0.81     | 12<br>1.08     |
| Disagree                                                                                                                   | 3<br>0.27<br>33.33<br>0.81     | 2<br>0.18<br>22.22<br>0.55     | 4<br>0.36<br>44.44<br>1.08     | 9<br>0.81      |
| Somewhat disagree                                                                                                          | 4<br>0.36<br>80.00<br>1.08     | 0<br>0.00<br>0.00<br>0.00      | 1<br>0.09<br>20.00<br>0.27     | 5<br>0.45      |
| Neutral                                                                                                                    | 15<br>1.36<br>45.45<br>4.04    | 5<br>0.45<br>15.15<br>1.37     | 13<br>1.17<br>39.39<br>3.50    | 33<br>2.98     |
| Somewhat agree                                                                                                             | 28<br>2.53<br>36.84<br>7.55    | 13<br>1.17<br>17.11<br>3.56    | 35<br>3.16<br>46.05<br>9.43    | 76<br>6.87     |
| Agree                                                                                                                      | 97<br>8.76<br>36.74<br>26.15   | 69<br>6.23<br>26.14<br>18.90   | 98<br>8.85<br>37.12<br>26.42   | 264<br>23.85   |
| Strongly agree                                                                                                             | 218<br>19.69<br>30.79<br>58.76 | 273<br>24.66<br>38.56<br>74.79 | 217<br>19.60<br>30.65<br>58.49 | 708<br>63.96   |
| Total                                                                                                                      | 371<br>33.51                   | 365<br>32.97                   | 371<br>33.51                   | 1107<br>100.00 |

### Summary

| Table 2 of attitude_c by event                                                                                             |                                |                                |                        |               |
|----------------------------------------------------------------------------------------------------------------------------|--------------------------------|--------------------------------|------------------------|---------------|
| Controlling for group=Experimental                                                                                         |                                |                                |                        |               |
| attitude_c(I would like to fulfill my professional responsibility by reporting cases where I suspect child abuse/neglect.) | event(Time)                    |                                |                        |               |
| Frequency<br>Percent<br>Row Pct<br>Col Pct                                                                                 | Pre-survey                     | Post-survey                    | Re-test                | Total         |
| <b>Strongly disagree</b>                                                                                                   | 10<br>1.33<br>71.43<br>2.65    | 4<br>0.53<br>28.57<br>1.07     | 0<br>0.00<br>0.00<br>. | 14<br>1.87    |
| <b>Disagree</b>                                                                                                            | 8<br>1.07<br>72.73<br>2.12     | 3<br>0.40<br>27.27<br>0.80     | 0<br>0.00<br>0.00<br>. | 11<br>1.47    |
| <b>Somewhat disagree</b>                                                                                                   | 4<br>0.53<br>66.67<br>1.06     | 2<br>0.27<br>33.33<br>0.54     | 0<br>0.00<br>0.00<br>. | 6<br>0.80     |
| <b>Neutral</b>                                                                                                             | 14<br>1.87<br>87.50<br>3.71    | 2<br>0.27<br>12.50<br>0.54     | 0<br>0.00<br>0.00<br>. | 16<br>2.13    |
| <b>Somewhat agree</b>                                                                                                      | 33<br>4.40<br>70.21<br>8.75    | 14<br>1.87<br>29.79<br>3.75    | 0<br>0.00<br>0.00<br>. | 47<br>6.27    |
| <b>Agree</b>                                                                                                               | 100<br>13.33<br>56.18<br>26.53 | 78<br>10.40<br>43.82<br>20.91  | 0<br>0.00<br>0.00<br>. | 178<br>23.73  |
| <b>Strongly agree</b>                                                                                                      | 208<br>27.73<br>43.51<br>55.17 | 270<br>36.00<br>56.49<br>72.39 | 0<br>0.00<br>0.00<br>. | 478<br>63.73  |
| <b>Total</b>                                                                                                               | 377<br>50.27                   | 373<br>49.73                   | 0<br>0.00              | 750<br>100.00 |
| Frequency Missing = 1                                                                                                      |                                |                                |                        |               |

### *Summary*

| <b>Reporting cases of suspected child abuse/neglect improves children's safety.</b> |                  |                |                             |                           |
|-------------------------------------------------------------------------------------|------------------|----------------|-----------------------------|---------------------------|
| <b>attitude_d</b>                                                                   | <b>Frequency</b> | <b>Percent</b> | <b>Cumulative Frequency</b> | <b>Cumulative Percent</b> |
| <b>Strongly disagree</b>                                                            | 22               | 1.18           | 22                          | 1.18                      |
| <b>Disagree</b>                                                                     | 20               | 1.08           | 42                          | 2.26                      |
| <b>Somewhat disagree</b>                                                            | 9                | 0.48           | 51                          | 2.74                      |
| <b>Neutral</b>                                                                      | 77               | 4.14           | 128                         | 6.89                      |
| <b>Somewhat agree</b>                                                               | 131              | 7.05           | 259                         | 13.94                     |
| <b>Agree</b>                                                                        | 477              | 25.67          | 736                         | 39.61                     |
| <b>Strongly agree</b>                                                               | 1122             | 60.39          | 1858                        | 100.00                    |

*Summary*

| Table 1 of attitude_d by event                                                           |                                |                                |                                |                |
|------------------------------------------------------------------------------------------|--------------------------------|--------------------------------|--------------------------------|----------------|
| Controlling for group=Control                                                            |                                |                                |                                |                |
| attitude_d(Reporting cases of suspected child abuse/neglect improves children's safety.) | event(Time)                    |                                |                                |                |
| Frequency<br>Percent<br>Row Pct<br>Col Pct                                               | Pre-survey                     | Post-survey                    | Re-test                        | Total          |
| <b>Strongly disagree</b>                                                                 | 10<br>0.90<br>58.82<br>2.70    | 3<br>0.27<br>17.65<br>0.82     | 4<br>0.36<br>23.53<br>1.08     | 17<br>1.54     |
| <b>Disagree</b>                                                                          | 6<br>0.54<br>54.55<br>1.62     | 2<br>0.18<br>18.18<br>0.55     | 3<br>0.27<br>27.27<br>0.81     | 11<br>0.99     |
| <b>Somewhat disagree</b>                                                                 | 0<br>0.00<br>0.00<br>0.00      | 0<br>0.00<br>0.00<br>0.00      | 2<br>0.18<br>100.00<br>0.54    | 2<br>0.18      |
| <b>Neutral</b>                                                                           | 25<br>2.26<br>50.00<br>6.74    | 8<br>0.72<br>16.00<br>2.19     | 17<br>1.54<br>34.00<br>4.58    | 50<br>4.52     |
| <b>Somewhat agree</b>                                                                    | 35<br>3.16<br>43.21<br>9.43    | 12<br>1.08<br>14.81<br>3.29    | 34<br>3.07<br>41.98<br>9.16    | 81<br>7.32     |
| <b>Agree</b>                                                                             | 100<br>9.03<br>35.21<br>26.95  | 79<br>7.14<br>27.82<br>21.64   | 105<br>9.49<br>36.97<br>28.30  | 284<br>25.65   |
| <b>Strongly agree</b>                                                                    | 195<br>17.62<br>29.46<br>52.56 | 261<br>23.58<br>39.43<br>71.51 | 206<br>18.61<br>31.12<br>55.53 | 662<br>59.80   |
| <b>Total</b>                                                                             | 371<br>33.51                   | 365<br>32.97                   | 371<br>33.51                   | 1107<br>100.00 |

*Summary*

| Table 2 of attitude_d by event                                                           |                                |                                |                        |               |
|------------------------------------------------------------------------------------------|--------------------------------|--------------------------------|------------------------|---------------|
| Controlling for group=Experimental                                                       |                                |                                |                        |               |
| attitude_d(Reporting cases of suspected child abuse/neglect improves children's safety.) | event(Time)                    |                                |                        |               |
| Frequency<br>Percent<br>Row Pct<br>Col Pct                                               | Pre-survey                     | Post-survey                    | Re-test                | Total         |
| Strongly disagree                                                                        | 5<br>0.67<br>100.00<br>1.32    | 0<br>0.00<br>0.00<br>0.00      | 0<br>0.00<br>0.00<br>. | 5<br>0.67     |
| Disagree                                                                                 | 7<br>0.93<br>77.78<br>1.85     | 2<br>0.27<br>22.22<br>0.54     | 0<br>0.00<br>0.00<br>. | 9<br>1.20     |
| Somewhat disagree                                                                        | 6<br>0.80<br>85.71<br>1.59     | 1<br>0.13<br>14.29<br>0.27     | 0<br>0.00<br>0.00<br>. | 7<br>0.93     |
| Neutral                                                                                  | 22<br>2.93<br>81.48<br>5.82    | 5<br>0.67<br>18.52<br>1.34     | 0<br>0.00<br>0.00<br>. | 27<br>3.60    |
| Somewhat agree                                                                           | 42<br>5.59<br>84.00<br>11.11   | 8<br>1.07<br>16.00<br>2.14     | 0<br>0.00<br>0.00<br>. | 50<br>6.66    |
| Agree                                                                                    | 107<br>14.25<br>55.44<br>28.31 | 86<br>11.45<br>44.56<br>23.06  | 0<br>0.00<br>0.00<br>. | 193<br>25.70  |
| Strongly agree                                                                           | 189<br>25.17<br>41.09<br>50.00 | 271<br>36.09<br>58.91<br>72.65 | 0<br>0.00<br>0.00<br>. | 460<br>61.25  |
| Total                                                                                    | 378<br>50.33                   | 373<br>49.67                   | 0<br>0.00              | 751<br>100.00 |

### *Summary*

| <b>I would not report child abuse/neglect if I thought the child would be removed from his/her family.</b> |                  |                |                             |                           |
|------------------------------------------------------------------------------------------------------------|------------------|----------------|-----------------------------|---------------------------|
| <b>attitude_e</b>                                                                                          | <b>Frequency</b> | <b>Percent</b> | <b>Cumulative Frequency</b> | <b>Cumulative Percent</b> |
| <b>Strongly disagree</b>                                                                                   | 1049             | 56.49          | 1049                        | 56.49                     |
| <b>Disagree</b>                                                                                            | 543              | 29.24          | 1592                        | 85.73                     |
| <b>Somewhat disagree</b>                                                                                   | 117              | 6.30           | 1709                        | 92.03                     |
| <b>Neutral</b>                                                                                             | 78               | 4.20           | 1787                        | 96.23                     |
| <b>Somewhat agree</b>                                                                                      | 25               | 1.35           | 1812                        | 97.58                     |
| <b>Agree</b>                                                                                               | 27               | 1.45           | 1839                        | 99.03                     |
| <b>Strongly agree</b>                                                                                      | 18               | 0.97           | 1857                        | 100.00                    |
| <b>Frequency Missing = 1</b>                                                                               |                  |                |                             |                           |

### Summary

| Table 1 of attitude_e by event                                                                                  |                                |                                |                                |                |
|-----------------------------------------------------------------------------------------------------------------|--------------------------------|--------------------------------|--------------------------------|----------------|
| Controlling for group=Control                                                                                   |                                |                                |                                |                |
| attitude_e(I would not report child abuse/neglect if I thought the child would be removed from his/her family.) | event(Time)                    |                                |                                |                |
| Frequency<br>Percent<br>Row Pct<br>Col Pct                                                                      | Pre-survey                     | Post-survey                    | Re-test                        | Total          |
| Strongly disagree                                                                                               | 188<br>16.98<br>29.79<br>50.67 | 253<br>22.85<br>40.10<br>69.32 | 190<br>17.16<br>30.11<br>51.21 | 631<br>57.00   |
| Disagree                                                                                                        | 116<br>10.48<br>38.28<br>31.27 | 78<br>7.05<br>25.74<br>21.37   | 109<br>9.85<br>35.97<br>29.38  | 303<br>27.37   |
| Somewhat disagree                                                                                               | 26<br>2.35<br>33.77<br>7.01    | 20<br>1.81<br>25.97<br>5.48    | 31<br>2.80<br>40.26<br>8.36    | 77<br>6.96     |
| Neutral                                                                                                         | 27<br>2.44<br>46.55<br>7.28    | 7<br>0.63<br>12.07<br>1.92     | 24<br>2.17<br>41.38<br>6.47    | 58<br>5.24     |
| Somewhat agree                                                                                                  | 7<br>0.63<br>46.67<br>1.89     | 3<br>0.27<br>20.00<br>0.82     | 5<br>0.45<br>33.33<br>1.35     | 15<br>1.36     |
| Agree                                                                                                           | 4<br>0.36<br>30.77<br>1.08     | 2<br>0.18<br>15.38<br>0.55     | 7<br>0.63<br>53.85<br>1.89     | 13<br>1.17     |
| Strongly agree                                                                                                  | 3<br>0.27<br>30.00<br>0.81     | 2<br>0.18<br>20.00<br>0.55     | 5<br>0.45<br>50.00<br>1.35     | 10<br>0.90     |
| Total                                                                                                           | 371<br>33.51                   | 365<br>32.97                   | 371<br>33.51                   | 1107<br>100.00 |

### Summary

| Table 2 of attitude_e by event                                                                                  |                                |                                |                        |               |
|-----------------------------------------------------------------------------------------------------------------|--------------------------------|--------------------------------|------------------------|---------------|
| Controlling for group=Experimental                                                                              |                                |                                |                        |               |
| attitude_e(I would not report child abuse/neglect if I thought the child would be removed from his/her family.) | event(Time)                    |                                |                        |               |
| Frequency<br>Percent<br>Row Pct<br>Col Pct                                                                      | Pre-survey                     | Post-survey                    | Re-test                | Total         |
| <b>Strongly disagree</b>                                                                                        | 176<br>23.47<br>42.11<br>46.68 | 242<br>32.27<br>57.89<br>64.88 | 0<br>0.00<br>0.00<br>. | 418<br>55.73  |
| <b>Disagree</b>                                                                                                 | 138<br>18.40<br>57.50<br>36.60 | 102<br>13.60<br>42.50<br>27.35 | 0<br>0.00<br>0.00<br>. | 240<br>32.00  |
| <b>Somewhat disagree</b>                                                                                        | 32<br>4.27<br>80.00<br>8.49    | 8<br>1.07<br>20.00<br>2.14     | 0<br>0.00<br>0.00<br>. | 40<br>5.33    |
| <b>Neutral</b>                                                                                                  | 12<br>1.60<br>60.00<br>3.18    | 8<br>1.07<br>40.00<br>2.14     | 0<br>0.00<br>0.00<br>. | 20<br>2.67    |
| <b>Somewhat agree</b>                                                                                           | 8<br>1.07<br>80.00<br>2.12     | 2<br>0.27<br>20.00<br>0.54     | 0<br>0.00<br>0.00<br>. | 10<br>1.33    |
| <b>Agree</b>                                                                                                    | 9<br>1.20<br>64.29<br>2.39     | 5<br>0.67<br>35.71<br>1.34     | 0<br>0.00<br>0.00<br>. | 14<br>1.87    |
| <b>Strongly agree</b>                                                                                           | 2<br>0.27<br>25.00<br>0.53     | 6<br>0.80<br>75.00<br>1.61     | 0<br>0.00<br>0.00<br>. | 8<br>1.07     |
| <b>Total</b>                                                                                                    | 377<br>50.27                   | 373<br>49.73                   | 0<br>0.00              | 750<br>100.00 |
| Frequency Missing = 1                                                                                           |                                |                                |                        |               |

### *Summary*

| <b>Reporting suspected child abuse/neglect can result in children and families receiving helpful services.</b> |                  |                |                             |                           |
|----------------------------------------------------------------------------------------------------------------|------------------|----------------|-----------------------------|---------------------------|
| <b>attitude_f</b>                                                                                              | <b>Frequency</b> | <b>Percent</b> | <b>Cumulative Frequency</b> | <b>Cumulative Percent</b> |
| <b>Strongly disagree</b>                                                                                       | 19               | 1.02           | 19                          | 1.02                      |
| <b>Disagree</b>                                                                                                | 17               | 0.92           | 36                          | 1.94                      |
| <b>Somewhat disagree</b>                                                                                       | 16               | 0.86           | 52                          | 2.80                      |
| <b>Neutral</b>                                                                                                 | 84               | 4.52           | 136                         | 7.32                      |
| <b>Somewhat agree</b>                                                                                          | 198              | 10.66          | 334                         | 17.99                     |
| <b>Agree</b>                                                                                                   | 498              | 26.82          | 832                         | 44.80                     |
| <b>Strongly agree</b>                                                                                          | 1025             | 55.20          | 1857                        | 100.00                    |
| <b>Frequency Missing = 1</b>                                                                                   |                  |                |                             |                           |

### Summary

| Table 1 of attitude_f by event                                                                                      |                                |                                |                                |                |
|---------------------------------------------------------------------------------------------------------------------|--------------------------------|--------------------------------|--------------------------------|----------------|
| Controlling for group=Control                                                                                       |                                |                                |                                |                |
| attitude_f(Reporting suspected child abuse/neglect can result in children and families receiving helpful services.) | event(Time)                    |                                |                                |                |
| Frequency<br>Percent<br>Row Pct<br>Col Pct                                                                          | Pre-survey                     | Post-survey                    | Re-test                        | Total          |
| <b>Strongly disagree</b>                                                                                            | 4<br>0.36<br>40.00<br>1.08     | 2<br>0.18<br>20.00<br>0.55     | 4<br>0.36<br>40.00<br>1.08     | 10<br>0.90     |
| <b>Disagree</b>                                                                                                     | 5<br>0.45<br>71.43<br>1.35     | 1<br>0.09<br>14.29<br>0.27     | 1<br>0.09<br>14.29<br>0.27     | 7<br>0.63      |
| <b>Somewhat disagree</b>                                                                                            | 5<br>0.45<br>45.45<br>1.35     | 1<br>0.09<br>9.09<br>0.27      | 5<br>0.45<br>45.45<br>1.35     | 11<br>0.99     |
| <b>Neutral</b>                                                                                                      | 28<br>2.53<br>47.46<br>7.55    | 10<br>0.90<br>16.95<br>2.74    | 21<br>1.90<br>35.59<br>5.66    | 59<br>5.33     |
| <b>Somewhat agree</b>                                                                                               | 53<br>4.79<br>44.54<br>14.29   | 15<br>1.36<br>12.61<br>4.11    | 51<br>4.61<br>42.86<br>13.75   | 119<br>10.75   |
| <b>Agree</b>                                                                                                        | 110<br>9.94<br>38.46<br>29.65  | 83<br>7.50<br>29.02<br>22.74   | 93<br>8.40<br>32.52<br>25.07   | 286<br>25.84   |
| <b>Strongly agree</b>                                                                                               | 166<br>15.00<br>26.99<br>44.74 | 253<br>22.85<br>41.14<br>69.32 | 196<br>17.71<br>31.87<br>52.83 | 615<br>55.56   |
| <b>Total</b>                                                                                                        | 371<br>33.51                   | 365<br>32.97                   | 371<br>33.51                   | 1107<br>100.00 |

*Summary*

| Table 2 of attitude_f by event                                                                                      |                                |                                |                        |                           |
|---------------------------------------------------------------------------------------------------------------------|--------------------------------|--------------------------------|------------------------|---------------------------|
| Controlling for group=Experimental                                                                                  |                                |                                |                        |                           |
| attitude_f(Reporting suspected child abuse/neglect can result in children and families receiving helpful services.) | event(Time)                    |                                |                        |                           |
| Frequency<br>Percent<br>Row Pct<br>Col Pct                                                                          | Pre-survey                     | Post-survey                    | Re-test                | Total                     |
| <b>Strongly disagree</b>                                                                                            | 5<br>0.67<br>55.56<br>1.33     | 4<br>0.53<br>44.44<br>1.07     | 0<br>0.00<br>0.00<br>. | 9<br>1.20<br>0.00<br>.    |
| <b>Disagree</b>                                                                                                     | 9<br>1.20<br>90.00<br>2.39     | 1<br>0.13<br>10.00<br>0.27     | 0<br>0.00<br>0.00<br>. | 10<br>1.33<br>0.00<br>.   |
| <b>Somewhat disagree</b>                                                                                            | 2<br>0.27<br>40.00<br>0.53     | 3<br>0.40<br>60.00<br>0.80     | 0<br>0.00<br>0.00<br>. | 5<br>0.67<br>0.00<br>.    |
| <b>Neutral</b>                                                                                                      | 19<br>2.53<br>76.00<br>5.04    | 6<br>0.80<br>24.00<br>1.61     | 0<br>0.00<br>0.00<br>. | 25<br>3.33<br>0.00<br>.   |
| <b>Somewhat agree</b>                                                                                               | 66<br>8.80<br>83.54<br>17.51   | 13<br>1.73<br>16.46<br>3.49    | 0<br>0.00<br>0.00<br>. | 79<br>10.53<br>0.00<br>.  |
| <b>Agree</b>                                                                                                        | 108<br>14.40<br>50.94<br>28.65 | 104<br>13.87<br>49.06<br>27.88 | 0<br>0.00<br>0.00<br>. | 212<br>28.27<br>0.00<br>. |
| <b>Strongly agree</b>                                                                                               | 168<br>22.40<br>40.98<br>44.56 | 242<br>32.27<br>59.02<br>64.88 | 0<br>0.00<br>0.00<br>. | 410<br>54.67<br>0.00<br>. |
| <b>Total</b>                                                                                                        | 377<br>50.27                   | 373<br>49.73                   | 0<br>0.00              | 750<br>100.00             |
| Frequency Missing = 1                                                                                               |                                |                                |                        |                           |

### *Summary*

| <b>Early childhood practitioners should be required by law to report suspected child abuse/neglect.</b> |                  |                |                             |                           |
|---------------------------------------------------------------------------------------------------------|------------------|----------------|-----------------------------|---------------------------|
| <b>attitude_g</b>                                                                                       | <b>Frequency</b> | <b>Percent</b> | <b>Cumulative Frequency</b> | <b>Cumulative Percent</b> |
| <b>Strongly disagree</b>                                                                                | 27               | 1.45           | 27                          | 1.45                      |
| <b>Disagree</b>                                                                                         | 13               | 0.70           | 40                          | 2.15                      |
| <b>Somewhat disagree</b>                                                                                | 15               | 0.81           | 55                          | 2.96                      |
| <b>Neutral</b>                                                                                          | 54               | 2.91           | 109                         | 5.87                      |
| <b>Somewhat agree</b>                                                                                   | 85               | 4.58           | 194                         | 10.45                     |
| <b>Agree</b>                                                                                            | 412              | 22.19          | 606                         | 32.63                     |
| <b>Strongly agree</b>                                                                                   | 1251             | 67.37          | 1857                        | 100.00                    |
| <b>Frequency Missing = 1</b>                                                                            |                  |                |                             |                           |

### Summary

| Table 1 of attitude_g by event                                                                                                 |                                |                                |                                |                |
|--------------------------------------------------------------------------------------------------------------------------------|--------------------------------|--------------------------------|--------------------------------|----------------|
| Controlling for group=Control                                                                                                  |                                |                                |                                |                |
| attitude_g(Early<br>childhood<br>practitioners<br>should be required<br>by law to report<br>suspected child<br>abuse/neglect.) | event(Time)                    |                                |                                |                |
| Frequency<br>Percent<br>Row Pct<br>Col Pct                                                                                     | Pre-survey                     | Post-survey                    | Re-test                        | Total          |
| <b>Strongly disagree</b>                                                                                                       | 8<br>0.72<br>53.33<br>2.16     | 3<br>0.27<br>20.00<br>0.82     | 4<br>0.36<br>26.67<br>1.08     | 15<br>1.36     |
| <b>Disagree</b>                                                                                                                | 4<br>0.36<br>44.44<br>1.08     | 1<br>0.09<br>11.11<br>0.27     | 4<br>0.36<br>44.44<br>1.08     | 9<br>0.81      |
| <b>Somewhat disagree</b>                                                                                                       | 3<br>0.27<br>75.00<br>0.81     | 0<br>0.00<br>0.00<br>0.00      | 1<br>0.09<br>25.00<br>0.27     | 4<br>0.36      |
| <b>Neutral</b>                                                                                                                 | 18<br>1.63<br>51.43<br>4.85    | 3<br>0.27<br>8.57<br>0.82      | 14<br>1.26<br>40.00<br>3.77    | 35<br>3.16     |
| <b>Somewhat agree</b>                                                                                                          | 21<br>1.90<br>35.59<br>5.66    | 11<br>0.99<br>18.64<br>3.01    | 27<br>2.44<br>45.76<br>7.28    | 59<br>5.33     |
| <b>Agree</b>                                                                                                                   | 95<br>8.58<br>39.26<br>25.61   | 70<br>6.32<br>28.93<br>19.18   | 77<br>6.96<br>31.82<br>20.75   | 242<br>21.86   |
| <b>Strongly agree</b>                                                                                                          | 222<br>20.05<br>29.88<br>59.84 | 277<br>25.02<br>37.28<br>75.89 | 244<br>22.04<br>32.84<br>65.77 | 743<br>67.12   |
| <b>Total</b>                                                                                                                   | 371<br>33.51                   | 365<br>32.97                   | 371<br>33.51                   | 1107<br>100.00 |

### Summary

| Table 2 of attitude_g by event                                                                                                 |                                |                                |                        |               |
|--------------------------------------------------------------------------------------------------------------------------------|--------------------------------|--------------------------------|------------------------|---------------|
| Controlling for group=Experimental                                                                                             |                                |                                |                        |               |
| attitude_g(Early<br>childhood<br>practitioners<br>should be required<br>by law to report<br>suspected child<br>abuse/neglect.) | event(Time)                    |                                |                        |               |
| Frequency<br>Percent<br>Row Pct<br>Col Pct                                                                                     | Pre-survey                     | Post-survey                    | Re-test                | Total         |
| <b>Strongly disagree</b>                                                                                                       | 9<br>1.20<br>75.00<br>2.39     | 3<br>0.40<br>25.00<br>0.80     | 0<br>0.00<br>0.00<br>. | 12<br>1.60    |
| <b>Disagree</b>                                                                                                                | 3<br>0.40<br>75.00<br>0.80     | 1<br>0.13<br>25.00<br>0.27     | 0<br>0.00<br>0.00<br>. | 4<br>0.53     |
| <b>Somewhat disagree</b>                                                                                                       | 9<br>1.20<br>81.82<br>2.39     | 2<br>0.27<br>18.18<br>0.54     | 0<br>0.00<br>0.00<br>. | 11<br>1.47    |
| <b>Neutral</b>                                                                                                                 | 13<br>1.73<br>68.42<br>3.45    | 6<br>0.80<br>31.58<br>1.61     | 0<br>0.00<br>0.00<br>. | 19<br>2.53    |
| <b>Somewhat agree</b>                                                                                                          | 15<br>2.00<br>57.69<br>3.98    | 11<br>1.47<br>42.31<br>2.95    | 0<br>0.00<br>0.00<br>. | 26<br>3.47    |
| <b>Agree</b>                                                                                                                   | 93<br>12.40<br>54.71<br>24.67  | 77<br>10.27<br>45.29<br>20.64  | 0<br>0.00<br>0.00<br>. | 170<br>22.67  |
| <b>Strongly agree</b>                                                                                                          | 235<br>31.33<br>46.26<br>62.33 | 273<br>36.40<br>53.74<br>73.19 | 0<br>0.00<br>0.00<br>. | 508<br>67.73  |
| <b>Total</b>                                                                                                                   | 377<br>50.27                   | 373<br>49.73                   | 0<br>0.00              | 750<br>100.00 |
| Frequency Missing = 1                                                                                                          |                                |                                |                        |               |

### *Summary*

| <b>Children's long-term interests are promoted by early childhood practitioners reporting suspected child abuse/neglect</b> |                  |                |                             |                           |
|-----------------------------------------------------------------------------------------------------------------------------|------------------|----------------|-----------------------------|---------------------------|
| <b>attitude_h</b>                                                                                                           | <b>Frequency</b> | <b>Percent</b> | <b>Cumulative Frequency</b> | <b>Cumulative Percent</b> |
| <b>Strongly disagree</b>                                                                                                    | 38               | 2.05           | 38                          | 2.05                      |
| <b>Disagree</b>                                                                                                             | 31               | 1.67           | 69                          | 3.72                      |
| <b>Somewhat disagree</b>                                                                                                    | 29               | 1.56           | 98                          | 5.28                      |
| <b>Neutral</b>                                                                                                              | 186              | 10.02          | 284                         | 15.29                     |
| <b>Somewhat agree</b>                                                                                                       | 210              | 11.31          | 494                         | 26.60                     |
| <b>Agree</b>                                                                                                                | 470              | 25.31          | 964                         | 51.91                     |
| <b>Strongly agree</b>                                                                                                       | 893              | 48.09          | 1857                        | 100.00                    |
| <b>Frequency Missing = 1</b>                                                                                                |                  |                |                             |                           |

### Summary

| Table 1 of attitude_h by event                                                                                                                     |                                |                                |                                |                |
|----------------------------------------------------------------------------------------------------------------------------------------------------|--------------------------------|--------------------------------|--------------------------------|----------------|
| Controlling for group=Control                                                                                                                      |                                |                                |                                |                |
| attitude_h(Children's<br>long-term interests<br>are promoted by<br>early childhood<br>practitioners<br>reporting suspected<br>child abuse/neglect) | event(Time)                    |                                |                                |                |
| Frequency<br>Percent<br>Row Pct<br>Col Pct                                                                                                         | Pre-survey                     | Post-survey                    | Re-test                        | Total          |
| <b>Strongly disagree</b>                                                                                                                           | 11<br>0.99<br>45.83<br>2.96    | 5<br>0.45<br>20.83<br>1.37     | 8<br>0.72<br>33.33<br>2.16     | 24<br>2.17     |
| <b>Disagree</b>                                                                                                                                    | 10<br>0.90<br>45.45<br>2.70    | 6<br>0.54<br>27.27<br>1.64     | 6<br>0.54<br>27.27<br>1.62     | 22<br>1.99     |
| <b>Somewhat disagree</b>                                                                                                                           | 8<br>0.72<br>61.54<br>2.16     | 1<br>0.09<br>7.69<br>0.27      | 4<br>0.36<br>30.77<br>1.08     | 13<br>1.17     |
| <b>Neutral</b>                                                                                                                                     | 57<br>5.15<br>49.14<br>15.36   | 13<br>1.17<br>11.21<br>3.56    | 46<br>4.16<br>39.66<br>12.40   | 116<br>10.48   |
| <b>Somewhat agree</b>                                                                                                                              | 57<br>5.15<br>43.18<br>15.36   | 29<br>2.62<br>21.97<br>7.95    | 46<br>4.16<br>34.85<br>12.40   | 132<br>11.92   |
| <b>Agree</b>                                                                                                                                       | 94<br>8.49<br>35.07<br>25.34   | 78<br>7.05<br>29.10<br>21.37   | 96<br>8.67<br>35.82<br>25.88   | 268<br>24.21   |
| <b>Strongly agree</b>                                                                                                                              | 134<br>12.10<br>25.19<br>36.12 | 233<br>21.05<br>43.80<br>63.84 | 165<br>14.91<br>31.02<br>44.47 | 532<br>48.06   |
| <b>Total</b>                                                                                                                                       | 371<br>33.51                   | 365<br>32.97                   | 371<br>33.51                   | 1107<br>100.00 |

### Summary

| Table 2 of attitude_h by event                                                                                                   |                                |                                |                        |               |
|----------------------------------------------------------------------------------------------------------------------------------|--------------------------------|--------------------------------|------------------------|---------------|
| Controlling for group=Experimental                                                                                               |                                |                                |                        |               |
| attitude_h(Children's long-term interests are promoted by early childhood practitioners reporting suspected child abuse/neglect) | event(Time)                    |                                |                        |               |
| Frequency<br>Percent<br>Row Pct<br>Col Pct                                                                                       | Pre-survey                     | Post-survey                    | Re-test                | Total         |
| <b>Strongly disagree</b>                                                                                                         | 8<br>1.07<br>57.14<br>2.12     | 6<br>0.80<br>42.86<br>1.61     | 0<br>0.00<br>0.00<br>. | 14<br>1.87    |
| <b>Disagree</b>                                                                                                                  | 7<br>0.93<br>77.78<br>1.86     | 2<br>0.27<br>22.22<br>0.54     | 0<br>0.00<br>0.00<br>. | 9<br>1.20     |
| <b>Somewhat disagree</b>                                                                                                         | 12<br>1.60<br>75.00<br>3.18    | 4<br>0.53<br>25.00<br>1.07     | 0<br>0.00<br>0.00<br>. | 16<br>2.13    |
| <b>Neutral</b>                                                                                                                   | 57<br>7.60<br>81.43<br>15.12   | 13<br>1.73<br>18.57<br>3.49    | 0<br>0.00<br>0.00<br>. | 70<br>9.33    |
| <b>Somewhat agree</b>                                                                                                            | 55<br>7.33<br>70.51<br>14.59   | 23<br>3.07<br>29.49<br>6.17    | 0<br>0.00<br>0.00<br>. | 78<br>10.40   |
| <b>Agree</b>                                                                                                                     | 109<br>14.53<br>53.96<br>28.91 | 93<br>12.40<br>46.04<br>24.93  | 0<br>0.00<br>0.00<br>. | 202<br>26.93  |
| <b>Strongly agree</b>                                                                                                            | 129<br>17.20<br>35.73<br>34.22 | 232<br>30.93<br>64.27<br>62.20 | 0<br>0.00<br>0.00<br>. | 361<br>48.13  |
| <b>Total</b>                                                                                                                     | 377<br>50.27                   | 373<br>49.73                   | 0<br>0.00              | 750<br>100.00 |
| Frequency Missing = 1                                                                                                            |                                |                                |                        |               |

### *Summary*

| <b>I am concerned that I could be held legally liable for reporting child abuse/neglect that turns out to be unfounded</b> |                  |                |                             |                           |
|----------------------------------------------------------------------------------------------------------------------------|------------------|----------------|-----------------------------|---------------------------|
| <b>attitude_i</b>                                                                                                          | <b>Frequency</b> | <b>Percent</b> | <b>Cumulative Frequency</b> | <b>Cumulative Percent</b> |
| <b>Strongly disagree</b>                                                                                                   | 818              | 44.05          | 818                         | 44.05                     |
| <b>Disagree</b>                                                                                                            | 373              | 20.09          | 1191                        | 64.14                     |
| <b>Somewhat disagree</b>                                                                                                   | 132              | 7.11           | 1323                        | 71.24                     |
| <b>Neutral</b>                                                                                                             | 254              | 13.68          | 1577                        | 84.92                     |
| <b>Somewhat agree</b>                                                                                                      | 123              | 6.62           | 1700                        | 91.55                     |
| <b>Agree</b>                                                                                                               | 91               | 4.90           | 1791                        | 96.45                     |
| <b>Strongly agree</b>                                                                                                      | 66               | 3.55           | 1857                        | 100.00                    |
| <b>Frequency Missing = 1</b>                                                                                               |                  |                |                             |                           |

### Summary

| Table 1 of attitude_i by event                                                                                                  |                                |                                |                                |                |
|---------------------------------------------------------------------------------------------------------------------------------|--------------------------------|--------------------------------|--------------------------------|----------------|
| Controlling for group=Control                                                                                                   |                                |                                |                                |                |
| attitude_i(I am concerned that I could be held legally liable for reporting child abuse/neglect that turns out to be unfounded) | event(Time)                    |                                |                                |                |
| Frequency<br>Percent<br>Row Pct<br>Col Pct                                                                                      | Pre-survey                     | Post-survey                    | Re-test                        | Total          |
| Strongly disagree                                                                                                               | 120<br>10.84<br>24.49<br>32.35 | 231<br>20.87<br>47.14<br>63.29 | 139<br>12.56<br>28.37<br>37.47 | 490<br>44.26   |
| Disagree                                                                                                                        | 64<br>5.78<br>30.48<br>17.25   | 61<br>5.51<br>29.05<br>16.71   | 85<br>7.68<br>40.48<br>22.91   | 210<br>18.97   |
| Somewhat disagree                                                                                                               | 39<br>3.52<br>53.42<br>10.51   | 14<br>1.26<br>19.18<br>3.84    | 20<br>1.81<br>27.40<br>5.39    | 73<br>6.59     |
| Neutral                                                                                                                         | 67<br>6.05<br>43.23<br>18.06   | 19<br>1.72<br>12.26<br>5.21    | 69<br>6.23<br>44.52<br>18.60   | 155<br>14.00   |
| Somewhat agree                                                                                                                  | 40<br>3.61<br>49.38<br>10.78   | 12<br>1.08<br>14.81<br>3.29    | 29<br>2.62<br>35.80<br>7.82    | 81<br>7.32     |
| Agree                                                                                                                           | 27<br>2.44<br>45.76<br>7.28    | 13<br>1.17<br>22.03<br>3.56    | 19<br>1.72<br>32.20<br>5.12    | 59<br>5.33     |
| Strongly agree                                                                                                                  | 14<br>1.26<br>35.90<br>3.77    | 15<br>1.36<br>38.46<br>4.11    | 10<br>0.90<br>25.64<br>2.70    | 39<br>3.52     |
| Total                                                                                                                           | 371<br>33.51                   | 365<br>32.97                   | 371<br>33.51                   | 1107<br>100.00 |

### Summary

| Table 2 of attitude_i by event                                                                                                  |                                |                                |                        |               |
|---------------------------------------------------------------------------------------------------------------------------------|--------------------------------|--------------------------------|------------------------|---------------|
| Controlling for group=Experimental                                                                                              |                                |                                |                        |               |
| attitude_i(I am concerned that I could be held legally liable for reporting child abuse/neglect that turns out to be unfounded) | event(Time)                    |                                |                        |               |
| Frequency<br>Percent<br>Row Pct<br>Col Pct                                                                                      | Pre-survey                     | Post-survey                    | Re-test                | Total         |
| <b>Strongly disagree</b>                                                                                                        | 108<br>14.40<br>32.93<br>28.65 | 220<br>29.33<br>67.07<br>58.98 | 0<br>0.00<br>0.00<br>. | 328<br>43.73  |
| <b>Disagree</b>                                                                                                                 | 77<br>10.27<br>47.24<br>20.42  | 86<br>11.47<br>52.76<br>23.06  | 0<br>0.00<br>0.00<br>. | 163<br>21.73  |
| <b>Somewhat disagree</b>                                                                                                        | 46<br>6.13<br>77.97<br>12.20   | 13<br>1.73<br>22.03<br>3.49    | 0<br>0.00<br>0.00<br>. | 59<br>7.87    |
| <b>Neutral</b>                                                                                                                  | 74<br>9.87<br>74.75<br>19.63   | 25<br>3.33<br>25.25<br>6.70    | 0<br>0.00<br>0.00<br>. | 99<br>13.20   |
| <b>Somewhat agree</b>                                                                                                           | 32<br>4.27<br>76.19<br>8.49    | 10<br>1.33<br>23.81<br>2.68    | 0<br>0.00<br>0.00<br>. | 42<br>5.60    |
| <b>Agree</b>                                                                                                                    | 23<br>3.07<br>71.88<br>6.10    | 9<br>1.20<br>28.13<br>2.41     | 0<br>0.00<br>0.00<br>. | 32<br>4.27    |
| <b>Strongly agree</b>                                                                                                           | 17<br>2.27<br>62.96<br>4.51    | 10<br>1.33<br>37.04<br>2.68    | 0<br>0.00<br>0.00<br>. | 27<br>3.60    |
| <b>Total</b>                                                                                                                    | 377<br>50.27                   | 373<br>49.73                   | 0<br>0.00              | 750<br>100.00 |
| Frequency Missing = 1                                                                                                           |                                |                                |                        |               |

*Summary*

| <b>It is a waste of time to report child abuse/neglect because often no one follows up on the report</b> |                  |                |                             |                           |
|----------------------------------------------------------------------------------------------------------|------------------|----------------|-----------------------------|---------------------------|
| <b>attitude_j</b>                                                                                        | <b>Frequency</b> | <b>Percent</b> | <b>Cumulative Frequency</b> | <b>Cumulative Percent</b> |
| <b>Strongly disagree</b>                                                                                 | 1071             | 57.67          | 1071                        | 57.67                     |
| <b>Disagree</b>                                                                                          | 513              | 27.63          | 1584                        | 85.30                     |
| <b>Somewhat disagree</b>                                                                                 | 103              | 5.55           | 1687                        | 90.85                     |
| <b>Neutral</b>                                                                                           | 95               | 5.12           | 1782                        | 95.96                     |
| <b>Somewhat agree</b>                                                                                    | 38               | 2.05           | 1820                        | 98.01                     |
| <b>Agree</b>                                                                                             | 27               | 1.45           | 1847                        | 99.46                     |
| <b>Strongly agree</b>                                                                                    | 10               | 0.54           | 1857                        | 100.00                    |
| <b>Frequency Missing = 1</b>                                                                             |                  |                |                             |                           |

### Summary

| Table 1 of attitude_j by event                                                                                |                                |                                |                                |                |
|---------------------------------------------------------------------------------------------------------------|--------------------------------|--------------------------------|--------------------------------|----------------|
| Controlling for group=Control                                                                                 |                                |                                |                                |                |
| attitude_j(It is a waste of time to report child abuse/neglect because often no one follows up on the report) | event(Time)                    |                                |                                |                |
| Frequency<br>Percent<br>Row Pct<br>Col Pct                                                                    | Pre-survey                     | Post-survey                    | Re-test                        | Total          |
| Strongly disagree                                                                                             | 185<br>16.71<br>29.55<br>49.87 | 251<br>22.67<br>40.10<br>68.77 | 190<br>17.16<br>30.35<br>51.21 | 626<br>56.55   |
| Disagree                                                                                                      | 109<br>9.85<br>35.28<br>29.38  | 86<br>7.77<br>27.83<br>23.56   | 114<br>10.30<br>36.89<br>30.73 | 309<br>27.91   |
| Somewhat disagree                                                                                             | 30<br>2.71<br>45.45<br>8.09    | 11<br>0.99<br>16.67<br>3.01    | 25<br>2.26<br>37.88<br>6.74    | 66<br>5.96     |
| Neutral                                                                                                       | 30<br>2.71<br>48.39<br>8.09    | 7<br>0.63<br>11.29<br>1.92     | 25<br>2.26<br>40.32<br>6.74    | 62<br>5.60     |
| Somewhat agree                                                                                                | 11<br>0.99<br>40.74<br>2.96    | 7<br>0.63<br>25.93<br>1.92     | 9<br>0.81<br>33.33<br>2.43     | 27<br>2.44     |
| Agree                                                                                                         | 4<br>0.36<br>33.33<br>1.08     | 2<br>0.18<br>16.67<br>0.55     | 6<br>0.54<br>50.00<br>1.62     | 12<br>1.08     |
| Strongly agree                                                                                                | 2<br>0.18<br>40.00<br>0.54     | 1<br>0.09<br>20.00<br>0.27     | 2<br>0.18<br>40.00<br>0.54     | 5<br>0.45      |
| Total                                                                                                         | 371<br>33.51                   | 365<br>32.97                   | 371<br>33.51                   | 1107<br>100.00 |

### Summary

| Table 2 of attitude_j by event                                                                                |                                |                                |                        |               |
|---------------------------------------------------------------------------------------------------------------|--------------------------------|--------------------------------|------------------------|---------------|
| Controlling for group=Experimental                                                                            |                                |                                |                        |               |
| attitude_j(It is a waste of time to report child abuse/neglect because often no one follows up on the report) | event(Time)                    |                                |                        |               |
| Frequency<br>Percent<br>Row Pct<br>Col Pct                                                                    | Pre-survey                     | Post-survey                    | Re-test                | Total         |
| <b>Strongly disagree</b>                                                                                      | 185<br>24.67<br>41.57<br>49.07 | 260<br>34.67<br>58.43<br>69.71 | 0<br>0.00<br>0.00<br>. | 445<br>59.33  |
| <b>Disagree</b>                                                                                               | 119<br>15.87<br>58.33<br>31.56 | 85<br>11.33<br>41.67<br>22.79  | 0<br>0.00<br>0.00<br>. | 204<br>27.20  |
| <b>Somewhat disagree</b>                                                                                      | 25<br>3.33<br>67.57<br>6.63    | 12<br>1.60<br>32.43<br>3.22    | 0<br>0.00<br>0.00<br>. | 37<br>4.93    |
| <b>Neutral</b>                                                                                                | 29<br>3.87<br>87.88<br>7.69    | 4<br>0.53<br>12.12<br>1.07     | 0<br>0.00<br>0.00<br>. | 33<br>4.40    |
| <b>Somewhat agree</b>                                                                                         | 8<br>1.07<br>72.73<br>2.12     | 3<br>0.40<br>27.27<br>0.80     | 0<br>0.00<br>0.00<br>. | 11<br>1.47    |
| <b>Agree</b>                                                                                                  | 8<br>1.07<br>53.33<br>2.12     | 7<br>0.93<br>46.67<br>1.88     | 0<br>0.00<br>0.00<br>. | 15<br>2.00    |
| <b>Strongly agree</b>                                                                                         | 3<br>0.40<br>60.00<br>0.80     | 2<br>0.27<br>40.00<br>0.54     | 0<br>0.00<br>0.00<br>. | 5<br>0.67     |
| <b>Total</b>                                                                                                  | 377<br>50.27                   | 373<br>49.73                   | 0<br>0.00              | 750<br>100.00 |
| Frequency Missing = 1                                                                                         |                                |                                |                        |               |

*Summary*

| <b>I should still report suspected child abuse/neglect even if my work supervisor disagrees with me</b> |                  |                |                             |                           |
|---------------------------------------------------------------------------------------------------------|------------------|----------------|-----------------------------|---------------------------|
| <b>attitude_k</b>                                                                                       | <b>Frequency</b> | <b>Percent</b> | <b>Cumulative Frequency</b> | <b>Cumulative Percent</b> |
| <b>Strongly disagree</b>                                                                                | 73               | 3.93           | 73                          | 3.93                      |
| <b>Disagree</b>                                                                                         | 51               | 2.75           | 124                         | 6.68                      |
| <b>Somewhat disagree</b>                                                                                | 56               | 3.02           | 180                         | 9.69                      |
| <b>Neutral</b>                                                                                          | 225              | 12.12          | 405                         | 21.81                     |
| <b>Somewhat agree</b>                                                                                   | 219              | 11.79          | 624                         | 33.60                     |
| <b>Agree</b>                                                                                            | 421              | 22.67          | 1045                        | 56.27                     |
| <b>Strongly agree</b>                                                                                   | 812              | 43.73          | 1857                        | 100.00                    |
| <b>Frequency Missing = 1</b>                                                                            |                  |                |                             |                           |

### Summary

| Table 1 of attitude_k by event                                                                                                 |                                |                                |                                |                |
|--------------------------------------------------------------------------------------------------------------------------------|--------------------------------|--------------------------------|--------------------------------|----------------|
| Controlling for group=Control                                                                                                  |                                |                                |                                |                |
| attitude_k(I should<br>still report<br>suspected child<br>abuse/neglect even<br>if my work<br>supervisor<br>disagrees with me) | event(Time)                    |                                |                                |                |
| Frequency<br>Percent<br>Row Pct<br>Col Pct                                                                                     | Pre-survey                     | Post-survey                    | Re-test                        | Total          |
| <b>Strongly disagree</b>                                                                                                       | 17<br>1.54<br>41.46<br>4.58    | 12<br>1.08<br>29.27<br>3.29    | 12<br>1.08<br>29.27<br>3.23    | 41<br>3.70     |
| <b>Disagree</b>                                                                                                                | 11<br>0.99<br>31.43<br>2.96    | 5<br>0.45<br>14.29<br>1.37     | 19<br>1.72<br>54.29<br>5.12    | 35<br>3.16     |
| <b>Somewhat disagree</b>                                                                                                       | 15<br>1.36<br>46.88<br>4.04    | 1<br>0.09<br>3.13<br>0.27      | 16<br>1.45<br>50.00<br>4.31    | 32<br>2.89     |
| <b>Neutral</b>                                                                                                                 | 68<br>6.14<br>49.64<br>18.33   | 7<br>0.63<br>5.11<br>1.92      | 62<br>5.60<br>45.26<br>16.71   | 137<br>12.38   |
| <b>Somewhat agree</b>                                                                                                          | 70<br>6.32<br>47.62<br>18.87   | 21<br>1.90<br>14.29<br>5.75    | 56<br>5.06<br>38.10<br>15.09   | 147<br>13.28   |
| <b>Agree</b>                                                                                                                   | 74<br>6.68<br>31.49<br>19.95   | 83<br>7.50<br>35.32<br>22.74   | 78<br>7.05<br>33.19<br>21.02   | 235<br>21.23   |
| <b>Strongly agree</b>                                                                                                          | 116<br>10.48<br>24.17<br>31.27 | 236<br>21.32<br>49.17<br>64.66 | 128<br>11.56<br>26.67<br>34.50 | 480<br>43.36   |
| <b>Total</b>                                                                                                                   | 371<br>33.51                   | 365<br>32.97                   | 371<br>33.51                   | 1107<br>100.00 |

### Summary

| Table 2 of attitude_k by event                                                                                                 |                                |                                |                        |               |
|--------------------------------------------------------------------------------------------------------------------------------|--------------------------------|--------------------------------|------------------------|---------------|
| Controlling for group=Experimental                                                                                             |                                |                                |                        |               |
| attitude_k(I should<br>still report<br>suspected child<br>abuse/neglect even<br>if my work<br>supervisor<br>disagrees with me) | event(Time)                    |                                |                        |               |
| Frequency<br>Percent<br>Row Pct<br>Col Pct                                                                                     | Pre-survey                     | Post-survey                    | Re-test                | Total         |
| <b>Strongly disagree</b>                                                                                                       | 18<br>2.40<br>56.25<br>4.77    | 14<br>1.87<br>43.75<br>3.75    | 0<br>0.00<br>0.00<br>. | 32<br>4.27    |
| <b>Disagree</b>                                                                                                                | 15<br>2.00<br>93.75<br>3.98    | 1<br>0.13<br>6.25<br>0.27      | 0<br>0.00<br>0.00<br>. | 16<br>2.13    |
| <b>Somewhat disagree</b>                                                                                                       | 18<br>2.40<br>75.00<br>4.77    | 6<br>0.80<br>25.00<br>1.61     | 0<br>0.00<br>0.00<br>. | 24<br>3.20    |
| <b>Neutral</b>                                                                                                                 | 70<br>9.33<br>79.55<br>18.57   | 18<br>2.40<br>20.45<br>4.83    | 0<br>0.00<br>0.00<br>. | 88<br>11.73   |
| <b>Somewhat agree</b>                                                                                                          | 52<br>6.93<br>72.22<br>13.79   | 20<br>2.67<br>27.78<br>5.36    | 0<br>0.00<br>0.00<br>. | 72<br>9.60    |
| <b>Agree</b>                                                                                                                   | 94<br>12.53<br>50.54<br>24.93  | 92<br>12.27<br>49.46<br>24.66  | 0<br>0.00<br>0.00<br>. | 186<br>24.80  |
| <b>Strongly agree</b>                                                                                                          | 110<br>14.67<br>33.13<br>29.18 | 222<br>29.60<br>66.87<br>59.52 | 0<br>0.00<br>0.00<br>. | 332<br>44.27  |
| <b>Total</b>                                                                                                                   | 377<br>50.27                   | 373<br>49.73                   | 0<br>0.00              | 750<br>100.00 |
| Frequency Missing = 1                                                                                                          |                                |                                |                        |               |

### *Summary*

| <b>I have little confidence that Children and Youth Services will respond effectively if I report suspected child abuse/neglect</b> |                  |                |                             |                           |
|-------------------------------------------------------------------------------------------------------------------------------------|------------------|----------------|-----------------------------|---------------------------|
| <b>attitude_1</b>                                                                                                                   | <b>Frequency</b> | <b>Percent</b> | <b>Cumulative Frequency</b> | <b>Cumulative Percent</b> |
| <b>Strongly disagree</b>                                                                                                            | 754              | 40.60          | 754                         | 40.60                     |
| <b>Disagree</b>                                                                                                                     | 498              | 26.82          | 1252                        | 67.42                     |
| <b>Somewhat disagree</b>                                                                                                            | 184              | 9.91           | 1436                        | 77.33                     |
| <b>Neutral</b>                                                                                                                      | 200              | 10.77          | 1636                        | 88.10                     |
| <b>Somewhat agree</b>                                                                                                               | 91               | 4.90           | 1727                        | 93.00                     |
| <b>Agree</b>                                                                                                                        | 83               | 4.47           | 1810                        | 97.47                     |
| <b>Strongly agree</b>                                                                                                               | 47               | 2.53           | 1857                        | 100.00                    |
| <b>Frequency Missing = 1</b>                                                                                                        |                  |                |                             |                           |

### Summary

| Table 1 of attitude_1 by event                                                                                                           |                               |                                |                                |                |
|------------------------------------------------------------------------------------------------------------------------------------------|-------------------------------|--------------------------------|--------------------------------|----------------|
| Controlling for group=Control                                                                                                            |                               |                                |                                |                |
| attitude_1(I have little confidence that Children and Youth Services will respond effectively if I report suspected child abuse/neglect) | event(Time)                   |                                |                                |                |
| Frequency<br>Percent<br>Row Pct<br>Col Pct                                                                                               | Pre-survey                    | Post-survey                    | Re-test                        | Total          |
| Strongly disagree                                                                                                                        | 107<br>9.67<br>23.62<br>28.84 | 216<br>19.51<br>47.68<br>59.18 | 130<br>11.74<br>28.70<br>35.04 | 453<br>40.92   |
| Disagree                                                                                                                                 | 94<br>8.49<br>32.75<br>25.34  | 84<br>7.59<br>29.27<br>23.01   | 109<br>9.85<br>37.98<br>29.38  | 287<br>25.93   |
| Somewhat disagree                                                                                                                        | 53<br>4.79<br>46.09<br>14.29  | 23<br>2.08<br>20.00<br>6.30    | 39<br>3.52<br>33.91<br>10.51   | 115<br>10.39   |
| Neutral                                                                                                                                  | 59<br>5.33<br>48.36<br>15.90  | 16<br>1.45<br>13.11<br>4.38    | 47<br>4.25<br>38.52<br>12.67   | 122<br>11.02   |
| Somewhat agree                                                                                                                           | 26<br>2.35<br>50.98<br>7.01   | 9<br>0.81<br>17.65<br>2.47     | 16<br>1.45<br>31.37<br>4.31    | 51<br>4.61     |
| Agree                                                                                                                                    | 18<br>1.63<br>37.50<br>4.85   | 9<br>0.81<br>18.75<br>2.47     | 21<br>1.90<br>43.75<br>5.66    | 48<br>4.34     |
| Strongly agree                                                                                                                           | 14<br>1.26<br>45.16<br>3.77   | 8<br>0.72<br>25.81<br>2.19     | 9<br>0.81<br>29.03<br>2.43     | 31<br>2.80     |
| Total                                                                                                                                    | 371<br>33.51                  | 365<br>32.97                   | 371<br>33.51                   | 1107<br>100.00 |

### Summary

| Table 2 of attitude_1 by event                                                                                                           |                                |                                |                        |               |
|------------------------------------------------------------------------------------------------------------------------------------------|--------------------------------|--------------------------------|------------------------|---------------|
| Controlling for group=Experimental                                                                                                       |                                |                                |                        |               |
| attitude_1(I have little confidence that Children and Youth Services will respond effectively if I report suspected child abuse/neglect) | event(Time)                    |                                |                        |               |
| Frequency<br>Percent<br>Row Pct<br>Col Pct                                                                                               | Pre-survey                     | Post-survey                    | Re-test                | Total         |
| Strongly disagree                                                                                                                        | 104<br>13.87<br>34.55<br>27.59 | 197<br>26.27<br>65.45<br>52.82 | 0<br>0.00<br>0.00<br>. | 301<br>40.13  |
| Disagree                                                                                                                                 | 103<br>13.73<br>48.82<br>27.32 | 108<br>14.40<br>51.18<br>28.95 | 0<br>0.00<br>0.00<br>. | 211<br>28.13  |
| Somewhat disagree                                                                                                                        | 50<br>6.67<br>72.46<br>13.26   | 19<br>2.53<br>27.54<br>5.09    | 0<br>0.00<br>0.00<br>. | 69<br>9.20    |
| Neutral                                                                                                                                  | 64<br>8.53<br>82.05<br>16.98   | 14<br>1.87<br>17.95<br>3.75    | 0<br>0.00<br>0.00<br>. | 78<br>10.40   |
| Somewhat agree                                                                                                                           | 27<br>3.60<br>67.50<br>7.16    | 13<br>1.73<br>32.50<br>3.49    | 0<br>0.00<br>0.00<br>. | 40<br>5.33    |
| Agree                                                                                                                                    | 20<br>2.67<br>57.14<br>5.31    | 15<br>2.00<br>42.86<br>4.02    | 0<br>0.00<br>0.00<br>. | 35<br>4.67    |
| Strongly agree                                                                                                                           | 9<br>1.20<br>56.25<br>2.39     | 7<br>0.93<br>43.75<br>1.88     | 0<br>0.00<br>0.00<br>. | 16<br>2.13    |
| Total                                                                                                                                    | 377<br>50.27                   | 373<br>49.73                   | 0<br>0.00              | 750<br>100.00 |
| Frequency Missing = 1                                                                                                                    |                                |                                |                        |               |

*Summary*

| <b>I would not report suspected child abuse/neglect because it is too hard to be sure that abuse occurred</b> |                  |                |                             |                           |
|---------------------------------------------------------------------------------------------------------------|------------------|----------------|-----------------------------|---------------------------|
| <b>attitude_m</b>                                                                                             | <b>Frequency</b> | <b>Percent</b> | <b>Cumulative Frequency</b> | <b>Cumulative Percent</b> |
| <b>Strongly disagree</b>                                                                                      | 901              | 48.52          | 901                         | 48.52                     |
| <b>Disagree</b>                                                                                               | 531              | 28.59          | 1432                        | 77.11                     |
| <b>Somewhat disagree</b>                                                                                      | 197              | 10.61          | 1629                        | 87.72                     |
| <b>Neutral</b>                                                                                                | 141              | 7.59           | 1770                        | 95.32                     |
| <b>Somewhat agree</b>                                                                                         | 38               | 2.05           | 1808                        | 97.36                     |
| <b>Agree</b>                                                                                                  | 27               | 1.45           | 1835                        | 98.82                     |
| <b>Strongly agree</b>                                                                                         | 22               | 1.18           | 1857                        | 100.00                    |
| <b>Frequency Missing = 1</b>                                                                                  |                  |                |                             |                           |

### Summary

| Table 1 of attitude_m by event                                                                                                       |                                |                                |                                |                |
|--------------------------------------------------------------------------------------------------------------------------------------|--------------------------------|--------------------------------|--------------------------------|----------------|
| Controlling for group=Control                                                                                                        |                                |                                |                                |                |
| attitude_m(I would<br>not report<br>suspected child<br>abuse/neglect<br>because it is too<br>hard to be sure that<br>abuse occurred) | event(Time)                    |                                |                                |                |
| Frequency<br>Percent<br>Row Pct<br>Col Pct                                                                                           | Pre-survey                     | Post-survey                    | Re-test                        | Total          |
| Strongly disagree                                                                                                                    | 129<br>11.65<br>24.62<br>34.77 | 237<br>21.41<br>45.23<br>64.93 | 158<br>14.27<br>30.15<br>42.59 | 524<br>47.34   |
| Disagree                                                                                                                             | 110<br>9.94<br>35.71<br>29.65  | 92<br>8.31<br>29.87<br>25.21   | 106<br>9.58<br>34.42<br>28.57  | 308<br>27.82   |
| Somewhat disagree                                                                                                                    | 56<br>5.06<br>45.90<br>15.09   | 19<br>1.72<br>15.57<br>5.21    | 47<br>4.25<br>38.52<br>12.67   | 122<br>11.02   |
| Neutral                                                                                                                              | 53<br>4.79<br>53.00<br>14.29   | 9<br>0.81<br>9.00<br>2.47      | 38<br>3.43<br>38.00<br>10.24   | 100<br>9.03    |
| Somewhat agree                                                                                                                       | 12<br>1.08<br>57.14<br>3.23    | 2<br>0.18<br>9.52<br>0.55      | 7<br>0.63<br>33.33<br>1.89     | 21<br>1.90     |
| Agree                                                                                                                                | 5<br>0.45<br>27.78<br>1.35     | 3<br>0.27<br>16.67<br>0.82     | 10<br>0.90<br>55.56<br>2.70    | 18<br>1.63     |
| Strongly agree                                                                                                                       | 6<br>0.54<br>42.86<br>1.62     | 3<br>0.27<br>21.43<br>0.82     | 5<br>0.45<br>35.71<br>1.35     | 14<br>1.26     |
| Total                                                                                                                                | 371<br>33.51                   | 365<br>32.97                   | 371<br>33.51                   | 1107<br>100.00 |

### Summary

| Table 2 of attitude_m by event                                                                                                       |                                |                                |                        |               |
|--------------------------------------------------------------------------------------------------------------------------------------|--------------------------------|--------------------------------|------------------------|---------------|
| Controlling for group=Experimental                                                                                                   |                                |                                |                        |               |
| attitude_m(I would<br>not report<br>suspected child<br>abuse/neglect<br>because it is too<br>hard to be sure that<br>abuse occurred) | event(Time)                    |                                |                        |               |
| Frequency<br>Percent<br>Row Pct<br>Col Pct                                                                                           | Pre-survey                     | Post-survey                    | Re-test                | Total         |
| <b>Strongly disagree</b>                                                                                                             | 152<br>20.27<br>40.32<br>40.32 | 225<br>30.00<br>59.68<br>60.32 | 0<br>0.00<br>0.00<br>. | 377<br>50.27  |
| <b>Disagree</b>                                                                                                                      | 115<br>15.33<br>51.57<br>30.50 | 108<br>14.40<br>48.43<br>28.95 | 0<br>0.00<br>0.00<br>. | 223<br>29.73  |
| <b>Somewhat disagree</b>                                                                                                             | 57<br>7.60<br>76.00<br>15.12   | 18<br>2.40<br>24.00<br>4.83    | 0<br>0.00<br>0.00<br>. | 75<br>10.00   |
| <b>Neutral</b>                                                                                                                       | 32<br>4.27<br>78.05<br>8.49    | 9<br>1.20<br>21.95<br>2.41     | 0<br>0.00<br>0.00<br>. | 41<br>5.47    |
| <b>Somewhat agree</b>                                                                                                                | 12<br>1.60<br>70.59<br>3.18    | 5<br>0.67<br>29.41<br>1.34     | 0<br>0.00<br>0.00<br>. | 17<br>2.27    |
| <b>Agree</b>                                                                                                                         | 5<br>0.67<br>55.56<br>1.33     | 4<br>0.53<br>44.44<br>1.07     | 0<br>0.00<br>0.00<br>. | 9<br>1.20     |
| <b>Strongly agree</b>                                                                                                                | 4<br>0.53<br>50.00<br>1.06     | 4<br>0.53<br>50.00<br>1.07     | 0<br>0.00<br>0.00<br>. | 8<br>1.07     |
| <b>Total</b>                                                                                                                         | 377<br>50.27                   | 373<br>49.73                   | 0<br>0.00              | 750<br>100.00 |
| Frequency Missing = 1                                                                                                                |                                |                                |                        |               |
